# Supplementary material
Source: MDPI journal article supplement (https://www.mdpi.com/2073-4344/12/8/915)
Supplement: s1 [file s1]

## Supporting Information:

### Formation and Intramolecular Capture of $\alpha$ -Imino Gold Carbenoids in the Au(I)-Catalyzed [3 + 2] Reaction of Anthranils, 1,2,4-Oxadiazoles and 4,5-Dihydro-1,2,4-Oxadiazoles with Ynamides

#### Contents

Solvation Effects S-2

Cartesian coordinates of A-Series S-6

Cartesian coordinates of B-Series S-42

Cartesian coordinates of C-Series S-72

Tables of partial charges of crucial structures of B/C-Series S-103

Energy diagrams of B/C-Series including alternative attack of N-4 of oxadiazole S-106

#### List of Figures

S1 A-series reaction mechanism..... S-5

S2 B-series reaction mechanism..... S-41

S3 C-series reaction mechanism..... S-71

S4 B-series reaction mechanism ..... S-106

S5 C-series reaction mechanism ..... S-107

#### Solvation Effects

| Structure           | Gas phase SCF energy | Solv. Effect |  | Solution phase SCF energy |
|---------------------|----------------------|--------------|--|---------------------------|
| A-series            | A.U.                 | kcal/mol     |  | A.U.                      |
| 1a                  | -1660.631455         | -20.9        |  | -1660.664707              |
| 2                   | -399.0803095         | -2.0         |  | -399.083469               |
| 3a1                 | -2059.743484         | -22.1        |  | -2059.778775              |
| 3a2                 | -2059.752059         | -21.3        |  | -2059.785955              |
| 4a1                 | -2059.811325         | -22.2        |  | -2059.846655              |
| 4a2                 | -2059.785408         | -23.0        |  | -2059.822135              |
| 5a1 <sub>anti</sub> | -2059.789509         | -24.6        |  | -2059.828742              |
| 5a1 <sub>syn</sub>  | -2059.780881         | -24.0        |  | -2059.819176              |

|                         |              |              |              |              |
|-------------------------|--------------|--------------|--------------|--------------|
| 5a2 <sub>anti</sub>     | -2059.80376  | <b>-21.7</b> | <b>-21.7</b> | -2059.838396 |
| 5a2 <sub>syn</sub>      | -2059.799664 | <b>-21.5</b> |              | -2059.833853 |
| 6a1 <sub>anti</sub>     | -2059.779871 | <b>-24.7</b> |              | -2059.819204 |
| 6a1                     | -2059.869334 | <b>-22.7</b> |              | -2059.905476 |
| 6a1 <sub>syn</sub>      | -2059.776651 | <b>-25.1</b> |              | -2059.816668 |
| 6a2 <sub>anti</sub>     | -2059.786424 | <b>-25.3</b> |              | -2059.826684 |
| 6a2                     | -2059.862758 | <b>-22.6</b> |              | -2059.898715 |
| 6a2 <sub>syn</sub>      | -2059.78844  | <b>-23.0</b> |              | -2059.825098 |
| TS <sub>3a1</sub>       | -2059.704011 | <b>-20.7</b> |              | -2059.736946 |
| TS <sub>3a2</sub>       | -2059.727328 | <b>-19.8</b> |              | -2059.758827 |
| TS <sub>4a1</sub>       | -2059.736971 | <b>-21.7</b> |              | -2059.771558 |
| TS <sub>4a2</sub>       | -2059.739043 | <b>-20.4</b> |              | -2059.771592 |
| TS <sub>5a1_anti</sub>  | -2059.776951 | <b>-21.9</b> |              | -2059.811906 |
| TS <sub>5a1_syn</sub>   | -2059.763183 | <b>-21.9</b> |              | -2059.79813  |
| TS <sub>5a2_anti</sub>  | -2059.767457 | <b>-21.7</b> | <b>-22.1</b> | -2059.802044 |
| TS <sub>5a2_syn</sub>   | -2059.766955 | <b>-20.9</b> |              | -2059.800304 |
| TS <sub>6a1_anti'</sub> | -2059.754691 | <b>-23.9</b> |              | -2059.792787 |
| TS <sub>6a1_anti</sub>  | -2059.769403 | <b>-23.1</b> |              | -2059.806289 |
| TS <sub>6a1_syn</sub>   | -2059.758855 | <b>-24.1</b> |              | -2059.7972   |
| TS <sub>6a2_anti'</sub> | -2059.758562 | <b>-24.0</b> |              | -2059.796773 |
| TS <sub>6a2_anti</sub>  | -2059.769206 | <b>-23.2</b> |              | -2059.806154 |
| TS <sub>6a2_syn'</sub>  | -2059.757416 | <b>-21.9</b> |              | -2059.792272 |
| TS <sub>6a2_syn</sub>   | -2059.767057 | <b>-22.4</b> |              | -2059.802723 |

average values in boldface

| Structure | Gas phase SCF energy | Solv. Effect |              | Solution phase SCF energy |
|-----------|----------------------|--------------|--------------|---------------------------|
| B-series  | A.U.                 | kcal/mol     |              | A.U.                      |
| 1b        | -1429.919991         | <b>-24.1</b> |              | -1429.95846               |
| 2b        | -762.3983785         | <b>-2.0</b>  |              | -762.4015868              |
| 3b1       | -2192.357401         | <b>-20.5</b> |              | -2192.390039              |
| 3b2       | -2192.361702         | <b>-20.9</b> |              | -2192.395084              |
| 4b1       | -2192.37417          | <b>-24.6</b> |              | -2192.413441              |
| 4b2       | -2192.386678         | <b>-24.3</b> |              | -2192.425423              |
| 5b1       | -2192.357917         | <b>-20.2</b> |              | -2192.390075              |
| 5b2       | -2192.3574           | <b>-23.8</b> |              | -2192.395386              |
| 6b1B      | -2192.356339         | <b>-20.0</b> | <b>-20.4</b> | -2192.388167              |
| 6b1       | -2192.439821         | <b>-23.0</b> |              | -2192.476486              |

|                     |              |              |              |              |
|---------------------|--------------|--------------|--------------|--------------|
| 6b2B                | -2192.357399 | <b>-20.1</b> |              | -2192.38943  |
| 6b2                 | -2192.452758 | <b>-21.1</b> |              | -2192.486364 |
| TS <sub>3b1</sub>   | -2192.332326 | <b>-21.3</b> |              | -2192.366303 |
| TS <sub>3b2</sub>   | -2192.326364 | <b>-20.2</b> |              | -2192.358629 |
| TS <sub>4b1</sub>   | -2192.350205 | <b>-19.4</b> |              | -2192.381146 |
| TS <sub>4b2</sub>   | -2192.346655 | <b>-20.3</b> |              | -2192.37904  |
| TS <sub>5b1</sub>   | -2192.33341  | <b>-20.8</b> | <b>-21.0</b> | -2192.36649  |
| TS <sub>5b2</sub>   | -2192.337623 | <b>-24.3</b> |              | -2192.376423 |
| TS <sub>6b1A</sub>  | -2192.33584  | <b>-22.2</b> |              | -2192.37118  |
| TS <sub>6b1B'</sub> | -2192.343166 | <b>-20.6</b> |              | -2192.375942 |
| TS <sub>6b1B</sub>  | -2192.344463 | <b>-20.2</b> |              | -2192.376607 |
| TS <sub>6b2A</sub>  | -2192.334355 | <b>-22.0</b> |              | -2192.369348 |
| TS <sub>6b2B'</sub> | -2192.339445 | <b>-20.3</b> |              | -2192.371753 |
| TS <sub>6b2B</sub>  | -2192.351036 | <b>-20.5</b> |              | -2192.383777 |

average values in boldface

| Structure | Gas phase SCF energy | Solv. Effect |              | Solution phase SCF energy |
|-----------|----------------------|--------------|--------------|---------------------------|
| C-series  | A.U.                 | kcal/mol     |              | A.U.                      |
| 1b        | -1586.315612         | <b>-41.3</b> |              | -1586.381375              |
| 2c        | -724.3060386         | <b>-6.8</b>  |              | -724.3168507              |
| 3c1       | -2310.682937         | <b>-36.5</b> |              | -2310.741157              |
| 3c2       | -2310.680006         | <b>-36.7</b> |              | -2310.738434              |
| 4c1'      | -1965.619604         | <b>-39.3</b> | <b>-33.4</b> | -1965.682154              |
| 4c1       | -2310.680308         | <b>-34.9</b> |              | -2310.735894              |
| 4c2'      | -1965.631635         | <b>-38.8</b> |              | -1965.693535              |
| 5c1       | -1965.600329         | <b>-34.9</b> |              | -1965.655971              |
| 5c2       | -1965.604836         | <b>-39.6</b> |              | -1965.667921              |
| 6c1A      | -1965.595689         | <b>-36.5</b> |              | -1965.653913              |

|                     |              |              |              |              |
|---------------------|--------------|--------------|--------------|--------------|
| 6c1B                | -1965.606333 | <b>-35.4</b> |              | -1965.662751 |
| 6c1                 | -1965.706768 | <b>-35.9</b> |              | -1965.764042 |
| 6c2A                | -1965.590613 | <b>-38.7</b> |              | -1965.65235  |
| 6c2B                | -1965.603713 | <b>-36.1</b> |              | -1965.661316 |
| 6c2                 | -1965.702307 | <b>-39.7</b> |              | -1965.765556 |
| benzaldehyde        | -345.0592262 | <b>-3.3</b>  |              | -345.0644655 |
| TS <sub>3c1</sub>   | -2310.646406 | <b>-37.6</b> |              | -2310.706364 |
| TS <sub>3c2</sub>   | -2310.633541 | <b>-36.2</b> |              | -2310.69122  |
| TS <sub>4c1'</sub>  | -2310.677423 | <b>-34.7</b> |              | -2310.732662 |
| TS <sub>4c1</sub>   | -2310.664582 | <b>-34.2</b> |              | -2310.719099 |
| TS <sub>4c2</sub>   | -2310.663918 | <b>-37.3</b> |              | -2310.723312 |
| TS <sub>5c1</sub>   | -1965.577278 | <b>-36.2</b> | <b>-36.8</b> | -1965.635043 |
| TS <sub>5c2</sub>   | -1965.576943 | <b>-38.2</b> |              | -1965.637822 |
| TS <sub>6c1A'</sub> | -1965.595822 | <b>-36.4</b> |              | -1965.653908 |
| TS <sub>6c1A</sub>  | -1965.587062 | <b>-36.1</b> |              | -1965.644633 |
| TS <sub>6c1B</sub>  | -1965.597359 | <b>-35.8</b> |              | -1965.654478 |
| TS <sub>6c2A</sub>  | -1965.582648 | <b>-40.2</b> |              | -1965.646778 |
| TS <sub>6c2B</sub>  | -1965.591864 | <b>-38.5</b> |              | -1965.653285 |
| TS <sub>6c1B'</sub> | -1965.589463 | <b>-36.6</b> |              | -1965.647745 |
| TS <sub>6c2A'</sub> | -1965.588634 | <b>-37.6</b> |              | -1965.648502 |
| TS <sub>6c2B'</sub> | -1965.585258 | <b>-36.4</b> |              | -1965.643268 |

average values in boldface

## Cartesian coordinates of A-Series

S - 5

51

scf done: -1660.664707

|    |           |           |           |
|----|-----------|-----------|-----------|
| C  | 5.139051  | -0.573601 | -1.654363 |
| C  | 5.592180  | 0.423811  | -0.851957 |
| N  | 3.797469  | -0.732642 | -1.372568 |
| C  | 3.407965  | 0.141625  | -0.418196 |
| N  | 4.514937  | 0.848953  | -0.100532 |
| Au | 1.499307  | 0.348154  | 0.343815  |
| C  | 2.938388  | -1.691860 | -2.043771 |
| C  | 4.585049  | 1.919528  | 0.875561  |
| H  | 5.650812  | -1.189387 | -2.394006 |
| H  | 6.583361  | 0.863730  | -0.741488 |
| H  | 3.455293  | -2.662795 | -2.113982 |
| H  | 2.009488  | -1.822666 | -1.465101 |
| H  | 2.690348  | -1.340062 | -3.060168 |
| H  | 5.447459  | 1.758400  | 1.543151  |
| H  | 4.692818  | 2.895287  | 0.371660  |
| H  | 3.660297  | 1.919936  | 1.473569  |
| C  | -0.753442 | -0.586475 | 1.503668  |
| C  | -0.522057 | 0.580960  | 1.027055  |
| N  | -1.009754 | -1.834807 | 1.635666  |
| C  | -1.361502 | 1.758507  | 0.841531  |
| C  | -0.846820 | -2.648712 | 2.843192  |
| S  | -1.421020 | -2.734908 | 0.102558  |
| O  | -2.060390 | -3.940937 | 0.589651  |
| C  | -2.562677 | -1.616835 | -0.622823 |
| O  | -0.186020 | -2.763710 | -0.661165 |
| H  | -1.788241 | -3.174725 | 3.066981  |
| H  | -0.042332 | -3.389047 | 2.692437  |
| H  | -0.581850 | -1.976872 | 3.673837  |
| C  | -2.680318 | 1.768813  | 1.330777  |
| C  | -3.515669 | 2.850469  | 1.084054  |
| C  | -3.049609 | 3.936887  | 0.339290  |
| C  | -1.743099 | 3.940462  | -0.147396 |
| C  | -0.901307 | 2.861179  | 0.107287  |
| H  | -3.045927 | 0.913245  | 1.913096  |
| H  | -4.539895 | 2.849120  | 1.474180  |
| H  | -3.709050 | 4.790134  | 0.143907  |
| H  | -1.375015 | 4.794245  | -0.726650 |
| H  | 0.126968  | 2.858976  | -0.275471 |
| C  | -2.109127 | -0.691711 | -1.565459 |
| C  | -3.003637 | 0.253709  | -2.048117 |
| C  | -4.334495 | 0.285230  | -1.606513 |
| C  | -4.760746 | -0.673967 | -0.675623 |
| C  | -3.883714 | -1.626253 | -0.171877 |
| H  | -1.068208 | -0.714509 | -1.907295 |
| H  | -2.664290 | 0.991802  | -2.785349 |
| C  | -5.268636 | 1.339381  | -2.106780 |
| H  | -5.805219 | -0.673287 | -0.341982 |
| H  | -4.217417 | -2.373111 | 0.557189  |
| H  | -6.325251 | 1.056541  | -1.961268 |
| H  | -5.099488 | 2.290568  | -1.563689 |
| H  | -5.105525 | 1.548617  | -3.178940 |

14

```

scf done: -399.083469
C      -0.725546      -1.583504      0.000000
C       0.508775      -2.170618      0.000000
C       1.713680      -1.389747      0.000000
C       1.697989      -0.023338      0.000000
C       0.424861       0.620318      0.000000
C      -0.782150      -0.160104      0.000000
C      -1.759208       0.807414      0.000000
O      -1.194425       2.008322      0.000000
N       0.171274       1.920772      0.000000
H      -1.642188      -2.182634      0.000000
H       0.592893      -3.263124      0.000000
H       2.674670      -1.917282      0.000000
H       2.615649       0.573064      0.000000
H      -2.849919       0.790009      0.000000

```

**TS<sub>3a1</sub>**

65

```

scf done: -2059.736946
C       6.120458       1.287426      -0.552737
C       6.360899       0.498129      -1.644030
C       5.587814      -0.679909      -1.894576
C       4.570899      -1.086633      -1.070477
C       4.297834      -0.279663       0.067011
C       5.069922       0.898830       0.321309
C       4.507277       1.394482       1.476702
O       3.524696       0.606294       1.873132
N       3.378776      -0.453339       1.019063
H       6.710793       2.187434      -0.354843
H       7.160315       0.761690      -2.344487
H       5.826328      -1.279393      -2.780520
H       3.995137      -1.996028      -1.269907
H       4.703084       2.266831       2.102236
C       1.291525      -0.948042       0.672563
C       0.549181       0.029003       1.044142
Au      -1.432907      -0.709346       0.626082
C      -3.397119      -1.206715       0.229812
N      -4.454775      -0.369281       0.309834
C      -5.621091      -1.031326      -0.018855
C      -5.273994      -2.310749      -0.314107
N      -3.904299      -2.397177      -0.156187
C      -3.140487      -3.611568      -0.371491
C      -4.373643       1.019527       0.727144
H      -6.590834      -0.533648      -0.015751
H      -5.875365      -3.164793      -0.625399
H      -3.418657      -4.375936       0.373736
H      -3.333620      -4.003622      -1.384084
H      -2.067277      -3.381733      -0.269992
H      -5.338049       1.511180       0.522983
H      -4.156771       1.086451       1.807531
H      -3.578107       1.539175       0.164138
C       1.502139      -2.201709       0.006802
N       0.738164       1.337836       1.460048
S       1.229971       2.444404       0.246543
C      -0.151100       1.868165       2.484200
H      -0.138278       1.180650       3.346221
H      -1.198712       1.976666       2.126106
H       0.232329       2.846028       2.817193
O       1.676716       3.629292       0.960809

```

|   |           |           |           |
|---|-----------|-----------|-----------|
| O | 2.108183  | 1.709204  | -0.649311 |
| C | -0.278553 | 2.808477  | -0.609030 |
| C | -1.061597 | 3.888786  | -0.204013 |
| C | -2.288139 | 4.101425  | -0.826909 |
| C | -2.743331 | 3.250635  | -1.842892 |
| C | -1.931414 | 2.175569  | -2.231647 |
| C | -0.699971 | 1.949393  | -1.626774 |
| H | -0.705407 | 4.560720  | 0.584820  |
| H | -2.908754 | 4.952075  | -0.519472 |
| C | -4.058982 | 3.492206  | -2.514593 |
| H | -2.270674 | 1.507413  | -3.033301 |
| H | -0.057459 | 1.122696  | -1.950413 |
| H | -4.748671 | 4.063538  | -1.868436 |
| H | -3.925594 | 4.078339  | -3.444687 |
| H | -4.548687 | 2.543926  | -2.801718 |
| C | 2.061828  | -3.292878 | 0.691922  |
| C | 2.270291  | -4.494607 | 0.026609  |
| C | 1.930841  | -4.615098 | -1.323324 |
| C | 1.383047  | -3.532482 | -2.013869 |
| C | 1.172381  | -2.326131 | -1.354831 |
| H | 2.339801  | -3.175101 | 1.744800  |
| H | 2.704471  | -5.346420 | 0.560878  |
| H | 2.100766  | -5.563904 | -1.844534 |
| H | 1.127225  | -3.628752 | -3.074565 |
| H | 0.757463  | -1.459452 | -1.884388 |

### 3a1

65

scf done: -2059.778775

|    |           |           |           |
|----|-----------|-----------|-----------|
| C  | 4.753876  | 1.841919  | 1.649569  |
| C  | 4.461387  | 1.394648  | 2.911451  |
| C  | 3.183309  | 0.841730  | 3.226406  |
| C  | 2.178876  | 0.707155  | 2.295682  |
| C  | 2.475090  | 1.159273  | 0.995423  |
| C  | 3.735015  | 1.734666  | 0.666839  |
| C  | 3.603071  | 2.097334  | -0.661496 |
| O  | 2.414376  | 1.776450  | -1.121877 |
| N  | 1.699787  | 1.175110  | -0.104454 |
| H  | 5.728588  | 2.272913  | 1.400911  |
| H  | 5.213678  | 1.464300  | 3.703421  |
| H  | 2.998296  | 0.513444  | 4.255123  |
| H  | 1.198768  | 0.282674  | 2.534029  |
| H  | 4.264488  | 2.598084  | -1.371519 |
| C  | 0.316784  | 0.918388  | -0.295254 |
| C  | -0.195510 | -0.320739 | -0.037925 |
| Au | -2.267655 | -0.516024 | 0.166451  |
| C  | -4.339472 | -0.586667 | 0.382506  |
| N  | -5.140746 | 0.482712  | 0.596937  |
| C  | -6.462027 | 0.092904  | 0.690542  |
| C  | -6.482936 | -1.254780 | 0.524861  |
| N  | -5.172593 | -1.650432 | 0.338531  |
| C  | -4.768263 | -3.023918 | 0.113061  |
| C  | -4.664949 | 1.845778  | 0.751545  |
| H  | -7.267413 | 0.806853  | 0.863435  |
| H  | -7.309358 | -1.965434 | 0.516582  |
| H  | -5.227099 | -3.411145 | -0.812610 |
| H  | -3.671673 | -3.056896 | 0.013118  |
| H  | -5.075652 | -3.656368 | 0.963233  |
| H  | -4.214856 | 1.990007  | 1.749245  |
| H  | -3.908448 | 2.071181  | -0.019862 |



|   |           |           |           |
|---|-----------|-----------|-----------|
| H | -5.514478 | 2.537156  | 0.635268  |
| C | -0.475933 | 2.098928  | -0.694502 |
| N | 0.672542  | -1.423423 | 0.121743  |
| S | 1.634224  | -1.895477 | -1.221846 |
| C | 0.186494  | -2.525277 | 0.950380  |
| H | -0.087825 | -2.119267 | 1.939313  |
| H | 0.974425  | -3.281923 | 1.085155  |
| H | -0.701758 | -3.018427 | 0.506352  |
| O | 1.558192  | -3.349088 | -1.269776 |
| O | 1.246526  | -1.085204 | -2.368118 |
| C | 3.308711  | -1.466131 | -0.798849 |
| C | 4.103482  | -0.864960 | -1.770800 |
| C | 5.447448  | -0.617734 | -1.490305 |
| C | 6.003831  | -0.961157 | -0.254004 |
| C | 5.177160  | -1.568195 | 0.704489  |
| C | 3.840297  | -1.834883 | 0.438075  |
| H | 3.667236  | -0.592137 | -2.738170 |
| H | 6.080608  | -0.151688 | -2.255856 |
| C | 7.447664  | -0.707767 | 0.048540  |
| H | 5.599846  | -1.843154 | 1.679476  |
| H | 3.213778  | -2.321858 | 1.195062  |
| H | 8.026864  | -1.650941 | 0.026683  |
| H | 7.908230  | -0.022762 | -0.684215 |
| H | 7.579269  | -0.279121 | 1.059600  |
| C | -0.343360 | 3.321156  | -0.019439 |
| C | -1.118333 | 4.418494  | -0.384456 |
| C | -2.026808 | 4.314145  | -1.439461 |
| C | -2.149910 | 3.110080  | -2.131900 |
| C | -1.375264 | 2.010272  | -1.766616 |
| H | 0.364468  | 3.408401  | 0.816952  |
| H | -1.015113 | 5.364059  | 0.160071  |
| H | -2.630854 | 5.181035  | -1.730644 |
| H | -2.843051 | 3.030217  | -2.977223 |
| H | -1.437867 | 1.071295  | -2.330295 |

### TS<sub>3a2</sub>

65

scf done: -2059.758827

|    |           |           |           |
|----|-----------|-----------|-----------|
| C  | -5.577215 | 1.336032  | 0.048563  |
| C  | -5.419191 | 2.072242  | -1.092852 |
| C  | -4.118596 | 2.430904  | -1.578075 |
| C  | -2.963348 | 2.064491  | -0.940345 |
| C  | -3.102389 | 1.294067  | 0.246302  |
| C  | -4.399959 | 0.932044  | 0.738384  |
| C  | -4.114247 | 0.193677  | 1.863907  |
| O  | -2.802300 | 0.118497  | 2.031609  |
| N  | -2.156727 | 0.805183  | 1.044045  |
| H  | -6.568963 | 1.066626  | 0.425897  |
| H  | -6.298600 | 2.407143  | -1.652992 |
| H  | -4.053176 | 3.027871  | -2.494631 |
| H  | -1.973155 | 2.350486  | -1.311752 |
| H  | -4.721320 | -0.315349 | 2.614032  |
| C  | -0.235730 | 0.155543  | 0.851419  |
| N  | -0.353900 | -1.117656 | 1.174315  |
| C  | 0.542583  | 1.134117  | 0.484072  |
| Au | 2.469065  | 0.301404  | 0.123518  |
| C  | 4.279347  | -0.611194 | -0.269471 |
| N  | 5.503382  | -0.069554 | -0.450896 |
| C  | 6.437523  | -1.054847 | -0.705520 |
| C  | 5.771865  | -2.238490 | -0.679728 |

|   |           |           |           |
|---|-----------|-----------|-----------|
| N | 4.450014  | -1.945314 | -0.412477 |
| C | 3.389432  | -2.929029 | -0.272197 |
| C | 5.813293  | 1.345337  | -0.394261 |
| H | 7.487420  | -0.825063 | -0.886726 |
| H | 6.119828  | -3.260160 | -0.831695 |
| H | 3.078146  | -3.016818 | 0.783715  |
| H | 2.515506  | -2.638737 | -0.879291 |
| H | 3.761750  | -3.906201 | -0.617272 |
| H | 4.885542  | 1.900118  | -0.183808 |
| H | 6.544939  | 1.544210  | 0.407022  |
| H | 6.228665  | 1.683829  | -1.358601 |
| S | -0.555727 | -2.294937 | -0.103918 |
| C | -0.213373 | -1.613038 | 2.545228  |
| C | -2.293038 | -2.308045 | -0.404372 |
| O | 0.118272  | -1.748419 | -1.270706 |
| O | -0.144491 | -3.547227 | 0.509098  |
| H | -1.044360 | -2.293893 | 2.800449  |
| H | 0.747340  | -2.142746 | 2.671533  |
| H | -0.248715 | -0.742837 | 3.219264  |
| C | -2.809232 | -1.516080 | -1.430493 |
| C | -4.180679 | -1.528873 | -1.656651 |
| C | -5.037892 | -2.316727 | -0.876370 |
| C | -4.485407 | -3.101653 | 0.146329  |
| C | -3.115997 | -3.111092 | 0.387056  |
| H | -2.139411 | -0.905426 | -2.046595 |
| H | -4.599219 | -0.913801 | -2.463057 |
| C | -6.508792 | -2.341084 | -1.149003 |
| H | -5.144484 | -3.731068 | 0.756827  |
| H | -2.686349 | -3.748943 | 1.167652  |
| H | -6.759816 | -3.143569 | -1.869855 |
| H | -7.091665 | -2.539762 | -0.232110 |
| H | -6.856083 | -1.389708 | -1.589897 |
| C | 0.241994  | 2.548588  | 0.264798  |
| C | 0.647745  | 3.169743  | -0.926895 |
| C | 0.328034  | 4.502169  | -1.173920 |
| C | -0.367310 | 5.243951  | -0.218812 |
| C | -0.739916 | 4.645654  | 0.984937  |
| C | -0.444393 | 3.306599  | 1.225723  |
| H | 1.208796  | 2.587619  | -1.669119 |
| H | 0.636094  | 4.969470  | -2.116154 |
| H | -0.607458 | 6.296377  | -0.407219 |
| H | -1.268928 | 5.229594  | 1.746772  |
| H | -0.738725 | 2.837384  | 2.170976  |

### 3a2

65

scf done: -2059.785955

|   |           |          |           |
|---|-----------|----------|-----------|
| C | -5.107898 | 1.725300 | -0.313728 |
| C | -4.838640 | 2.001578 | -1.627141 |
| C | -3.533425 | 1.809998 | -2.178576 |
| C | -2.472962 | 1.341888 | -1.440708 |
| C | -2.738843 | 1.064968 | -0.084711 |
| C | -4.032914 | 1.249858 | 0.485610  |
| C | -3.881913 | 0.850469 | 1.798935  |
| O | -2.640155 | 0.477487 | 2.037610  |
| N | -1.922032 | 0.599581 | 0.871289  |
| H | -6.104336 | 1.867807 | 0.114674  |
| H | -5.633157 | 2.378433 | -2.278884 |
| H | -3.377784 | 2.043126 | -3.237569 |

|    |           |           |           |
|----|-----------|-----------|-----------|
| H  | -1.476982 | 1.180418  | -1.864831 |
| H  | -4.565257 | 0.781832  | 2.647576  |
| C  | -0.542365 | 0.205604  | 0.878288  |
| N  | -0.375807 | -1.153079 | 1.212749  |
| C  | 0.432496  | 1.084115  | 0.540812  |
| Au | 2.332630  | 0.306358  | 0.148649  |
| C  | 4.154736  | -0.593194 | -0.301436 |
| N  | 5.368515  | -0.035004 | -0.509338 |
| C  | 6.309824  | -1.004152 | -0.796679 |
| C  | 5.660867  | -2.196943 | -0.764538 |
| N  | 4.342492  | -1.923746 | -0.461908 |
| C  | 3.305573  | -2.927332 | -0.290178 |
| C  | 5.659911  | 1.382987  | -0.447774 |
| H  | 7.351334  | -0.757965 | -1.003806 |
| H  | 6.018643  | -3.212469 | -0.934292 |
| H  | 3.096735  | -3.091920 | 0.781773  |
| H  | 2.376961  | -2.607075 | -0.791711 |
| H  | 3.647116  | -3.874531 | -0.736477 |
| H  | 4.730528  | 1.921807  | -0.204994 |
| H  | 6.411471  | 1.585455  | 0.334143  |
| H  | 6.042949  | 1.737560  | -1.419925 |
| S  | -0.553799 | -2.291735 | -0.024978 |
| C  | 0.310597  | -1.518427 | 2.446154  |
| C  | -2.317103 | -2.331021 | -0.243592 |
| O  | 0.020627  | -1.772164 | -1.264967 |
| O  | -0.095705 | -3.560698 | 0.526181  |
| H  | 0.134689  | -2.582723 | 2.668923  |
| H  | 1.403005  | -1.337754 | 2.384482  |
| H  | -0.106384 | -0.907626 | 3.266567  |
| C  | -2.870784 | -1.970258 | -1.469242 |
| C  | -4.256321 | -1.962707 | -1.606128 |
| C  | -5.092466 | -2.315339 | -0.539814 |
| C  | -4.503487 | -2.693309 | 0.676747  |
| C  | -3.122006 | -2.709262 | 0.831382  |
| H  | -2.214735 | -1.692302 | -2.301143 |
| H  | -4.702452 | -1.669989 | -2.565389 |
| C  | -6.579743 | -2.305564 | -0.708355 |
| H  | -5.145684 | -2.986321 | 1.516687  |
| H  | -2.668264 | -3.003411 | 1.786115  |
| H  | -7.104009 | -2.291121 | 0.263052  |
| H  | -6.912496 | -1.432861 | -1.299895 |
| H  | -6.921390 | -3.208467 | -1.250514 |
| C  | 0.114882  | 2.509429  | 0.361312  |
| C  | 0.534738  | 3.177528  | -0.800672 |
| C  | 0.179312  | 4.503916  | -1.029774 |
| C  | -0.567929 | 5.203740  | -0.082673 |
| C  | -0.954199 | 4.567328  | 1.097062  |
| C  | -0.622251 | 3.233133  | 1.315621  |
| H  | 1.135066  | 2.630939  | -1.540204 |
| H  | 0.500907  | 5.001128  | -1.952124 |
| H  | -0.834230 | 6.252542  | -0.255456 |
| H  | -1.516735 | 5.119263  | 1.859104  |
| H  | -0.918947 | 2.744472  | 2.253161  |

**TS<sub>4a1</sub>**

65

scf done: -2059.771558

|   |           |           |           |
|---|-----------|-----------|-----------|
| C | -4.451336 | -2.093906 | -1.696791 |
| C | -4.018461 | -1.794983 | -2.966669 |
| C | -2.721051 | -1.255523 | -3.177206 |

|    |           |           |           |
|----|-----------|-----------|-----------|
| C  | -1.849803 | -0.985039 | -2.143135 |
| C  | -2.293451 | -1.272103 | -0.834755 |
| C  | -3.574344 | -1.841066 | -0.618028 |
| C  | -3.652152 | -2.076625 | 0.760609  |
| O  | -2.631707 | -1.702009 | 1.418980  |
| N  | -1.613168 | -1.066602 | 0.301616  |
| H  | -5.443506 | -2.521350 | -1.515035 |
| H  | -4.666630 | -1.981889 | -3.828564 |
| H  | -2.400021 | -1.046441 | -4.204023 |
| H  | -0.850947 | -0.564379 | -2.306217 |
| H  | -4.468248 | -2.560881 | 1.317767  |
| C  | -0.323374 | -0.826222 | 0.627798  |
| C  | 0.189640  | 0.471491  | 0.468186  |
| Au | 2.219466  | 0.573111  | -0.066834 |
| C  | 4.225109  | 0.575120  | -0.625546 |
| N  | 5.006623  | -0.512752 | -0.818196 |
| C  | 6.288924  | -0.136868 | -1.165579 |
| C  | 6.304207  | 1.220354  | -1.191026 |
| N  | 5.030707  | 1.636919  | -0.857369 |
| C  | 4.636454  | 3.029474  | -0.775968 |
| C  | 4.588885  | -1.893097 | -0.658881 |
| H  | 7.072655  | -0.868191 | -1.363383 |
| H  | 7.102962  | 1.926523  | -1.417990 |
| H  | 3.577792  | 3.081179  | -0.475582 |
| H  | 5.250720  | 3.556158  | -0.026040 |
| H  | 4.761074  | 3.520036  | -1.756437 |
| H  | 4.842098  | -2.469003 | -1.565001 |
| H  | 5.089901  | -2.347519 | 0.213523  |
| H  | 3.498550  | -1.926200 | -0.498150 |
| C  | 0.528130  | -1.997554 | 0.930464  |
| N  | -0.587773 | 1.591714  | 0.475632  |
| C  | -0.051597 | 2.841172  | -0.075396 |
| S  | -1.910531 | 1.804546  | 1.605643  |
| H  | -0.847275 | 3.597353  | -0.141011 |
| H  | 0.757512  | 3.244782  | 0.562338  |
| H  | 0.339610  | 2.640797  | -1.086298 |
| O  | -1.742023 | 0.833013  | 2.671108  |
| O  | -1.906964 | 3.228766  | 1.901648  |
| C  | -3.389301 | 1.432312  | 0.695802  |
| C  | 0.326349  | -3.222627 | 0.277300  |
| C  | 1.138560  | -4.318067 | 0.556026  |
| C  | 2.157482  | -4.213752 | 1.504485  |
| C  | 2.351106  | -3.008923 | 2.178905  |
| C  | 1.539611  | -1.911212 | 1.899125  |
| H  | -0.471858 | -3.319813 | -0.470884 |
| H  | 0.974273  | -5.264720 | 0.028687  |
| H  | 2.789325  | -5.080312 | 1.730240  |
| H  | 3.129370  | -2.926947 | 2.946514  |
| H  | 1.665317  | -0.977482 | 2.461235  |
| C  | -4.468531 | 0.918082  | 1.412865  |
| C  | -5.679266 | 0.713761  | 0.755687  |
| C  | -5.825069 | 1.009166  | -0.605067 |
| C  | -4.720354 | 1.524278  | -1.297353 |
| C  | -3.507384 | 1.749869  | -0.656434 |
| H  | -4.356631 | 0.674015  | 2.475434  |
| H  | -6.533826 | 0.311955  | 1.314503  |
| C  | -7.128426 | 0.793688  | -1.308245 |
| H  | -4.814892 | 1.750583  | -2.366878 |
| H  | -2.655526 | 2.151807  | -1.218152 |
| H  | -7.752022 | 0.041084  | -0.794380 |
| H  | -7.716145 | 1.731442  | -1.345781 |

|   |           |          |           |
|---|-----------|----------|-----------|
| H | -6.975477 | 0.468647 | -2.353522 |
|---|-----------|----------|-----------|

# 4a1

65

scf done: -2059.846655

|    |           |           |           |
|----|-----------|-----------|-----------|
| C  | 4.174577  | -1.062910 | -1.873313 |
| C  | 3.371955  | -2.044756 | -2.435784 |
| C  | 2.012730  | -1.779404 | -2.622640 |
| C  | 1.466445  | -0.557140 | -2.246441 |
| C  | 2.264505  | 0.432461  | -1.648729 |
| C  | 3.646296  | 0.171693  | -1.469281 |
| C  | 4.572651  | 1.173310  | -0.917894 |
| O  | 4.273140  | 2.230318  | -0.412510 |
| N  | 1.748981  | 1.686032  | -1.366449 |
| H  | 5.250619  | -1.236588 | -1.740271 |
| H  | 3.800680  | -3.003081 | -2.749128 |
| H  | 1.365982  | -2.536283 | -3.083382 |
| H  | 0.406765  | -0.339511 | -2.431999 |
| H  | 5.652717  | 0.871194  | -1.002575 |
| C  | 0.959858  | 1.984891  | -0.411835 |
| C  | 0.455241  | 0.935064  | 0.523151  |
| Au | -1.403166 | 0.153384  | -0.030474 |
| C  | -3.280146 | -0.525094 | -0.594182 |
| N  | -4.213208 | -1.098970 | 0.197552  |
| C  | -5.340190 | -1.414253 | -0.534057 |
| C  | -5.096786 | -1.026774 | -1.813363 |
| N  | -3.829494 | -0.481975 | -1.828221 |
| C  | -3.161753 | 0.028149  | -3.012269 |
| C  | -4.077573 | -1.357120 | 1.620390  |
| H  | -6.216243 | -1.875389 | -0.078196 |
| H  | -5.714118 | -1.083982 | -2.709802 |
| H  | -2.630218 | 0.961717  | -2.766532 |
| H  | -2.439603 | -0.711094 | -3.400690 |
| H  | -3.914560 | 0.238147  | -3.787858 |
| H  | -3.128508 | -0.928027 | 1.980824  |
| H  | -4.914658 | -0.892204 | 2.167395  |
| H  | -4.081423 | -2.444064 | 1.811485  |
| C  | 0.513591  | 3.369922  | -0.186397 |
| N  | 1.183335  | 0.641323  | 1.552498  |
| C  | 2.414363  | 1.316708  | 1.980473  |
| S  | 0.676430  | -0.749188 | 2.652893  |
| H  | 2.685534  | 2.092134  | 1.245800  |
| H  | 3.240309  | 0.588398  | 2.044753  |
| H  | 2.258172  | 1.760498  | 2.976958  |
| O  | -0.755611 | -0.611392 | 2.845904  |
| C  | 1.037583  | -2.131474 | 1.630318  |
| O  | 1.620255  | -0.647324 | 3.746701  |
| C  | -0.448284 | 3.678597  | 0.786579  |
| C  | -0.823229 | 5.001499  | 1.004439  |
| C  | -0.235843 | 6.022107  | 0.258212  |
| C  | 0.731577  | 5.721197  | -0.703605 |
| C  | 1.107787  | 4.402781  | -0.925554 |
| H  | -0.920569 | 2.881847  | 1.377575  |
| H  | -1.577932 | 5.237195  | 1.762379  |
| H  | -0.528943 | 7.063630  | 0.431648  |
| H  | 1.201030  | 6.526425  | -1.279172 |
| H  | 1.879228  | 4.145728  | -1.659609 |
| C  | 2.377394  | -2.464836 | 1.412780  |
| C  | 2.667017  | -3.523824 | 0.565000  |
| C  | 1.644891  | -4.260644 | -0.053100 |

|   |           |           |           |
|---|-----------|-----------|-----------|
| C | 0.313086  | -3.913282 | 0.205906  |
| C | -0.004196 | -2.850645 | 1.045068  |
| H | 3.182965  | -1.906573 | 1.903517  |
| H | 3.713401  | -3.793087 | 0.377172  |
| C | 1.978362  | -5.408028 | -0.951542 |
| H | -0.494443 | -4.491375 | -0.259060 |
| H | -1.047360 | -2.592375 | 1.255606  |
| H | 1.155221  | -5.633836 | -1.651667 |
| H | 2.895340  | -5.210986 | -1.535651 |
| H | 2.166826  | -6.325632 | -0.360786 |

# TS<sub>4a2</sub>

65

scf done: -2059.771592

|    |           |           |           |
|----|-----------|-----------|-----------|
| C  | -3.985591 | 4.113527  | -0.872044 |
| C  | -3.165115 | 4.968165  | -1.566107 |
| C  | -1.887548 | 4.534851  | -2.007552 |
| C  | -1.401252 | 3.266877  | -1.763238 |
| C  | -2.224797 | 2.387296  | -1.034596 |
| C  | -3.507939 | 2.811592  | -0.598255 |
| C  | -4.077979 | 1.716333  | 0.059224  |
| O  | -3.322469 | 0.696977  | 0.144830  |
| N  | -1.970346 | 1.100795  | -0.718398 |
| H  | -4.977314 | 4.421479  | -0.526312 |
| H  | -3.490690 | 5.988951  | -1.787610 |
| H  | -1.260050 | 5.237225  | -2.567459 |
| H  | -0.414710 | 2.944467  | -2.111214 |
| H  | -5.095833 | 1.634623  | 0.469371  |
| C  | -0.821306 | 0.406501  | -0.464159 |
| C  | 0.258269  | 0.995101  | 0.176170  |
| Au | 2.140975  | 0.123983  | 0.005485  |
| C  | 3.982482  | -0.845028 | -0.091227 |
| N  | 4.228238  | -2.088121 | 0.380657  |
| C  | 5.544732  | -2.439798 | 0.165088  |
| C  | 6.133518  | -1.388002 | -0.460789 |
| N  | 5.158245  | -0.420526 | -0.606860 |
| C  | 5.383363  | 0.860985  | -1.243020 |
| C  | 3.243463  | -2.920892 | 1.052809  |
| H  | 5.944921  | -3.405229 | 0.474720  |
| H  | 7.153547  | -1.241084 | -0.815709 |
| H  | 5.636623  | 0.722860  | -2.308211 |
| H  | 4.462110  | 1.459360  | -1.164534 |
| H  | 6.207439  | 1.395397  | -0.740525 |
| H  | 2.328020  | -3.003866 | 0.442516  |
| H  | 3.672466  | -3.924058 | 1.201882  |
| H  | 2.981523  | -2.488442 | 2.033705  |
| N  | -0.770500 | -0.890232 | -1.000593 |
| C  | 0.043436  | 2.184342  | 0.990858  |
| C  | -1.297903 | -1.151980 | -2.327664 |
| S  | -0.663708 | -2.209814 | 0.066041  |
| C  | -2.307557 | -2.862909 | 0.164730  |
| O  | 0.176083  | -3.200939 | -0.598264 |
| O  | -0.301489 | -1.663974 | 1.368435  |
| H  | -0.932650 | -0.366514 | -3.012310 |
| H  | -0.912729 | -2.119500 | -2.691105 |
| H  | -2.407426 | -1.166117 | -2.353559 |
| C  | -1.016293 | 2.253122  | 1.915390  |
| C  | -1.239114 | 3.412625  | 2.650413  |
| C  | -0.422187 | 4.528594  | 2.462430  |
| C  | 0.648905  | 4.465318  | 1.569315  |

|   |           |           |           |
|---|-----------|-----------|-----------|
| C | 0.897556  | 3.294702  | 0.862422  |
| H | -1.643632 | 1.366311  | 2.074342  |
| H | -2.054196 | 3.447680  | 3.382369  |
| H | -0.606375 | 5.445455  | 3.033546  |
| H | 1.304993  | 5.332944  | 1.437503  |
| H | 1.748016  | 3.231364  | 0.171213  |
| C | -2.686673 | -3.910249 | -0.675274 |
| C | -3.983875 | -4.403142 | -0.591963 |
| C | -4.905591 | -3.870018 | 0.319141  |
| C | -4.489738 | -2.827869 | 1.158853  |
| C | -3.197935 | -2.318366 | 1.090510  |
| H | -1.961612 | -4.346197 | -1.371151 |
| H | -4.288369 | -5.233706 | -1.240604 |
| C | -6.305314 | -4.396341 | 0.382920  |
| H | -5.193413 | -2.418658 | 1.894418  |
| H | -2.873738 | -1.515571 | 1.761837  |
| H | -6.341790 | -5.478626 | 0.166265  |
| H | -6.761839 | -4.223936 | 1.373244  |
| H | -6.949574 | -3.896141 | -0.366519 |

## 4a2

65

scf done: -2059.822135

|    |           |           |           |
|----|-----------|-----------|-----------|
| C  | 5.071771  | -1.653280 | -1.890333 |
| C  | 4.410833  | -2.822081 | -2.237629 |
| C  | 3.016631  | -2.804018 | -2.328765 |
| C  | 2.301329  | -1.641240 | -2.065862 |
| C  | 2.958722  | -0.459589 | -1.688455 |
| C  | 4.373082  | -0.469291 | -1.609060 |
| C  | 5.165656  | 0.725256  | -1.275137 |
| O  | 4.747845  | 1.798130  | -0.903778 |
| N  | 2.257153  | 0.721196  | -1.521595 |
| H  | 6.168030  | -1.636248 | -1.830450 |
| H  | 4.971071  | -3.738371 | -2.449488 |
| H  | 2.475715  | -3.712580 | -2.617685 |
| H  | 1.208311  | -1.625974 | -2.165772 |
| H  | 6.272422  | 0.562191  | -1.393615 |
| C  | 1.495808  | 1.074295  | -0.561536 |
| C  | 1.157477  | 0.111869  | 0.507606  |
| Au | -0.651778 | -0.854435 | 0.247269  |
| C  | -2.532150 | -1.720734 | -0.005421 |
| N  | -3.238720 | -1.827155 | -1.152466 |
| C  | -4.501525 | -2.323735 | -0.901700 |
| C  | -4.578311 | -2.537054 | 0.438195  |
| N  | -3.358429 | -2.165659 | 0.967350  |
| C  | -3.041259 | -2.208282 | 2.381718  |
| C  | -2.764661 | -1.429516 | -2.464474 |
| H  | -5.224068 | -2.495382 | -1.699949 |
| H  | -5.381804 | -2.937042 | 1.056864  |
| H  | -3.569753 | -1.403579 | 2.922964  |
| H  | -3.337301 | -3.182827 | 2.803889  |
| H  | -1.954997 | -2.074384 | 2.508128  |
| H  | -1.667050 | -1.522763 | -2.497255 |
| H  | -3.206180 | -2.089968 | -3.228184 |
| H  | -3.043732 | -0.381077 | -2.676500 |
| N  | 0.928474  | 2.338322  | -0.600247 |
| C  | 2.144509  | -0.193652 | 1.475360  |
| C  | 1.319648  | 3.228462  | -1.689174 |
| S  | -0.116016 | 2.882063  | 0.630462  |
| C  | -1.732479 | 2.338996  | 0.135869  |

|   |           |           |           |
|---|-----------|-----------|-----------|
| O | -0.068313 | 4.329996  | 0.589255  |
| O | 0.265814  | 2.140720  | 1.830217  |
| H | 0.929029  | 2.857671  | -2.653863 |
| H | 0.931412  | 4.235672  | -1.477861 |
| H | 2.420856  | 3.261013  | -1.744652 |
| C | 3.283963  | 0.639025  | 1.644778  |
| C | 4.228286  | 0.343432  | 2.610266  |
| C | 4.060290  | -0.786160 | 3.419704  |
| C | 2.945988  | -1.622035 | 3.275673  |
| C | 1.992786  | -1.325719 | 2.319016  |
| H | 3.414451  | 1.518306  | 1.002502  |
| H | 5.102028  | 0.989612  | 2.741837  |
| H | 4.812870  | -1.019881 | 4.181436  |
| H | 2.832506  | -2.500408 | 3.918775  |
| H | 1.109690  | -1.963791 | 2.188774  |
| C | -2.562780 | 1.743944  | 1.084014  |
| C | -3.843938 | 1.351618  | 0.704825  |
| C | -4.302892 | 1.540100  | -0.604105 |
| C | -3.446164 | 2.153528  | -1.531180 |
| C | -2.169300 | 2.564997  | -1.169818 |
| H | -2.202471 | 1.583321  | 2.106530  |
| H | -4.507113 | 0.884340  | 1.444391  |
| C | -5.684213 | 1.129914  | -1.009517 |
| H | -3.795631 | 2.320208  | -2.558054 |
| H | -1.520501 | 3.054231  | -1.905849 |
| H | -5.701376 | 0.726727  | -2.039291 |
| H | -6.102894 | 0.368158  | -0.328430 |
| H | -6.371554 | 1.998169  | -0.996837 |

# TS<sub>5a1syn</sub>

65

scf done: -2059.798130

|    |           |           |           |
|----|-----------|-----------|-----------|
| C  | 2.250910  | 4.193290  | 1.376240  |
| C  | 1.150422  | 4.586806  | 0.583486  |
| C  | 0.131957  | 3.694440  | 0.353985  |
| C  | 0.216456  | 2.356064  | 0.864505  |
| C  | 1.410982  | 1.956781  | 1.562099  |
| C  | 2.411941  | 2.899874  | 1.861895  |
| C  | 3.693884  | 2.546727  | 2.512607  |
| O  | 4.128912  | 1.432298  | 2.639904  |
| N  | 1.502897  | 0.614978  | 1.763495  |
| H  | 3.040871  | 4.926048  | 1.589478  |
| H  | 1.091256  | 5.614534  | 0.212373  |
| H  | -0.791539 | 4.016715  | -0.144525 |
| H  | -0.717006 | 2.046317  | 1.363612  |
| H  | 4.272085  | 3.442131  | 2.871330  |
| C  | 0.839511  | -0.018131 | 0.841570  |
| C  | 0.110247  | 0.804336  | -0.207239 |
| Au | -1.983137 | 0.286634  | -0.132136 |
| C  | -3.965184 | -0.293282 | 0.079081  |
| N  | -4.395420 | -1.397249 | 0.731913  |
| C  | -5.771508 | -1.492584 | 0.670334  |
| C  | -6.206106 | -0.417258 | -0.035409 |
| N  | -5.082971 | 0.304531  | -0.389411 |
| C  | -5.126316 | 1.541463  | -1.144141 |
| C  | -3.538150 | -2.388599 | 1.356419  |
| H  | -6.316997 | -2.313748 | 1.135565  |
| H  | -7.210486 | -0.097074 | -0.312546 |
| H  | -5.649820 | 2.324149  | -0.569102 |
| H  | -4.094239 | 1.868844  | -1.346229 |



|   |           |           |           |
|---|-----------|-----------|-----------|
| H | -5.651031 | 1.382611  | -2.101123 |
| H | -3.303874 | -3.203739 | 0.649276  |
| H | -2.596854 | -1.911981 | 1.676377  |
| H | -4.048924 | -2.808166 | 2.238011  |
| C | 0.696736  | -1.475893 | 0.895377  |
| N | 0.659493  | 0.956933  | -1.470105 |
| C | -0.167891 | 1.532104  | -2.523035 |
| S | 2.394613  | 1.109367  | -1.729654 |
| H | -1.067462 | 0.902991  | -2.652401 |
| H | -0.483871 | 2.563127  | -2.261658 |
| H | 0.391587  | 1.564734  | -3.468737 |
| O | 2.540763  | 1.329994  | -3.159904 |
| O | 2.918554  | 2.077431  | -0.773052 |
| C | 2.998720  | -0.496306 | -1.323002 |
| C | 0.170164  | -2.210767 | -0.180624 |
| C | 0.052278  | -3.593937 | -0.096775 |
| C | 0.451463  | -4.259012 | 1.063395  |
| C | 0.987704  | -3.540044 | 2.134429  |
| C | 1.118558  | -2.159697 | 2.048673  |
| H | -0.138674 | -1.694666 | -1.098037 |
| H | -0.352577 | -4.158818 | -0.943955 |
| H | 0.350986  | -5.348312 | 1.131571  |
| H | 1.309584  | -4.063357 | 3.041415  |
| H | 1.553392  | -1.581678 | 2.870992  |
| C | 2.720349  | -1.546780 | -2.201637 |
| C | 3.167533  | -2.818665 | -1.880414 |
| C | 3.895825  | -3.054763 | -0.702276 |
| C | 4.188056  | -1.972770 | 0.135519  |
| C | 3.748717  | -0.687013 | -0.164595 |
| H | 2.151283  | -1.364791 | -3.120919 |
| H | 2.945651  | -3.657676 | -2.551697 |
| C | 4.359621  | -4.436301 | -0.366537 |
| H | 4.763387  | -2.140035 | 1.054036  |
| H | 3.962445  | 0.146608  | 0.513526  |
| H | 4.578335  | -4.541930 | 0.710425  |
| H | 3.604414  | -5.193231 | -0.646327 |
| H | 5.287007  | -4.686252 | -0.917916 |

### 5a1<sub>syn</sub>

65

scf done: -2059.819176

|    |           |           |           |
|----|-----------|-----------|-----------|
| C  | 2.297998  | 3.603454  | 1.369778  |
| C  | 2.993340  | 2.928442  | 0.301505  |
| C  | 2.448889  | 1.852326  | -0.312500 |
| C  | 1.068557  | 1.444088  | 0.066986  |
| C  | 0.644037  | 1.877421  | 1.431131  |
| C  | 1.138431  | 3.137815  | 1.932086  |
| C  | 0.526251  | 3.865747  | 3.063065  |
| O  | -0.499627 | 3.565602  | 3.613451  |
| N  | -0.106147 | 1.013960  | 2.043689  |
| H  | 2.739860  | 4.521850  | 1.780904  |
| H  | 3.970185  | 3.308916  | -0.015601 |
| H  | 2.957538  | 1.364571  | -1.153726 |
| H  | 0.442821  | 2.092787  | -0.610567 |
| H  | 1.111142  | 4.777963  | 3.366220  |
| C  | -0.162484 | -0.138308 | 1.264018  |
| C  | 0.509417  | 0.031063  | 0.020161  |
| Au | -1.713911 | 0.261672  | -0.618515 |
| C  | -3.636666 | 0.409858  | -1.324355 |
| N  | -4.700573 | -0.182258 | -0.740795 |

|   |           |           |           |
|---|-----------|-----------|-----------|
| C | -5.850975 | 0.099433  | -1.447417 |
| C | -5.486208 | 0.884998  | -2.494377 |
| N | -4.120141 | 1.063738  | -2.400408 |
| C | -3.343009 | 1.851747  | -3.337485 |
| C | -4.633566 | -1.000501 | 0.460080  |
| H | -6.825527 | -0.281888 | -1.142341 |
| H | -6.074203 | 1.333919  | -3.294759 |
| H | -3.692019 | 2.897941  | -3.334743 |
| H | -2.284714 | 1.821491  | -3.034538 |
| H | -3.441324 | 1.437399  | -4.354778 |
| H | -4.184687 | -0.425903 | 1.288120  |
| H | -5.654239 | -1.301562 | 0.740728  |
| H | -4.025317 | -1.903797 | 0.278416  |
| C | -0.856375 | -1.305313 | 1.828518  |
| N | 1.087026  | -1.005060 | -0.740259 |
| S | 2.318567  | -1.963813 | -0.020125 |
| C | 1.062857  | -0.953126 | -2.192555 |
| H | 1.407994  | -1.918621 | -2.597866 |
| H | 0.021270  | -0.805768 | -2.533304 |
| H | 1.690064  | -0.138978 | -2.613793 |
| C | 3.870022  | -1.239429 | -0.478791 |
| O | 2.147014  | -1.789581 | 1.414866  |
| O | 2.211822  | -3.262239 | -0.667995 |
| C | -0.943200 | -2.542298 | 1.161814  |
| C | -1.653817 | -3.592336 | 1.726255  |
| C | -2.285466 | -3.432963 | 2.963466  |
| C | -2.200197 | -2.215044 | 3.633597  |
| C | -1.490932 | -1.156596 | 3.072055  |
| H | -0.442933 | -2.688308 | 0.198714  |
| H | -1.705515 | -4.552986 | 1.202396  |
| H | -2.838487 | -4.268186 | 3.407826  |
| H | -2.685216 | -2.086720 | 4.607462  |
| H | -1.416792 | -0.196043 | 3.590394  |
| C | 4.401678  | -1.477471 | -1.747600 |
| C | 5.598782  | -0.864711 | -2.098967 |
| C | 6.286727  | -0.040983 | -1.195574 |
| C | 5.739265  | 0.157244  | 0.078709  |
| C | 4.535357  | -0.435055 | 0.445827  |
| H | 3.893094  | -2.148516 | -2.448327 |
| H | 6.023510  | -1.040968 | -3.094850 |
| C | 7.598550  | 0.571983  | -1.572541 |
| H | 6.273564  | 0.785811  | 0.802053  |
| H | 4.110759  | -0.282599 | 1.444297  |
| H | 7.804947  | 1.487668  | -0.991520 |
| H | 8.429179  | -0.133013 | -1.373831 |
| H | 7.638556  | 0.820630  | -2.647816 |

**TS<sub>5alanti</sub>**  
65

scf done: -2059.811906

|   |           |           |          |
|---|-----------|-----------|----------|
| C | -1.243711 | -2.196743 | 3.161912 |
| C | -0.162080 | -2.873041 | 2.555837 |
| C | 0.801222  | -2.150566 | 1.892973 |
| C | 0.691507  | -0.731637 | 1.803736 |
| C | -0.443088 | -0.062837 | 2.368987 |
| C | -1.419807 | -0.823103 | 3.066107 |
| C | -2.687713 | -0.256915 | 3.583338 |
| O | -3.199693 | 0.772596  | 3.229035 |
| N | -0.596559 | 1.231793  | 2.017629 |
| H | -2.004447 | -2.780924 | 3.697357 |

|    |           |           |           |
|----|-----------|-----------|-----------|
| H  | -0.082096 | -3.960686 | 2.648620  |
| H  | 1.684205  | -2.650475 | 1.474234  |
| H  | 1.629913  | -0.158902 | 1.839087  |
| H  | -3.186088 | -0.918882 | 4.344895  |
| C  | -0.023792 | 1.454099  | 0.860280  |
| C  | 0.407519  | 0.256660  | 0.092488  |
| Au | -1.450511 | -0.567251 | -0.621623 |
| C  | -3.391422 | -1.037806 | -1.129191 |
| N  | -4.436496 | -0.242919 | -0.807191 |
| C  | -5.618517 | -0.803525 | -1.244239 |
| C  | -5.296333 | -1.975254 | -1.852695 |
| N  | -3.923109 | -2.099377 | -1.770802 |
| C  | -3.176204 | -3.215274 | -2.315533 |
| C  | -4.318152 | 1.032405  | -0.112662 |
| H  | -6.582901 | -0.321879 | -1.082935 |
| H  | -5.917402 | -2.730971 | -2.333480 |
| H  | -3.293754 | -3.255690 | -3.411666 |
| H  | -2.111385 | -3.080023 | -2.069671 |
| H  | -3.533920 | -4.162019 | -1.877140 |
| H  | -3.707377 | 1.733050  | -0.708009 |
| H  | -5.325004 | 1.457943  | 0.017520  |
| H  | -3.851701 | 0.899937  | 0.880330  |
| C  | -0.003971 | 2.806934  | 0.290889  |
| N  | 1.496815  | 0.249728  | -0.707934 |
| C  | 1.590887  | -0.633932 | -1.862927 |
| S  | 2.949843  | 1.162895  | -0.320553 |
| C  | 4.220391  | -0.067573 | -0.290537 |
| O  | 2.710336  | 1.640259  | 1.036752  |
| O  | 3.195629  | 2.060188  | -1.434281 |
| H  | 1.553238  | -1.694100 | -1.543870 |
| H  | 0.759169  | -0.428683 | -2.560090 |
| H  | 2.536367  | -0.458674 | -2.401543 |
| C  | 0.099761  | 3.039870  | -1.089096 |
| C  | 0.071422  | 4.339711  | -1.582513 |
| C  | -0.051327 | 5.418128  | -0.706558 |
| C  | -0.158939 | 5.194705  | 0.666888  |
| C  | -0.143984 | 3.897522  | 1.162764  |
| H  | 0.195638  | 2.202115  | -1.790112 |
| H  | 0.148850  | 4.512987  | -2.661220 |
| H  | -0.064450 | 6.441535  | -1.098066 |
| H  | -0.256342 | 6.040892  | 1.355728  |
| H  | -0.238003 | 3.705033  | 2.236426  |
| C  | 4.355174  | -0.894609 | 0.827094  |
| C  | 5.371053  | -1.841117 | 0.842013  |
| C  | 6.262723  | -1.967284 | -0.234358 |
| C  | 6.115852  | -1.106244 | -1.329176 |
| C  | 5.102232  | -0.155071 | -1.367361 |
| H  | 3.694804  | -0.782498 | 1.694732  |
| H  | 5.494472  | -2.487410 | 1.719483  |
| C  | 7.338781  | -3.005506 | -0.209924 |
| H  | 6.819770  | -1.176043 | -2.166937 |
| H  | 5.000790  | 0.528177  | -2.217605 |
| H  | 7.748484  | -3.139621 | 0.806797  |
| H  | 6.941610  | -3.988526 | -0.530180 |
| H  | 8.168788  | -2.750041 | -0.890818 |

**5a1<sub>anti</sub>**

65

scf done: -2059.828742

|   |           |           |          |
|---|-----------|-----------|----------|
| C | -5.234106 | -0.862945 | 1.392972 |
|---|-----------|-----------|----------|

|    |           |           |           |
|----|-----------|-----------|-----------|
| C  | -4.698455 | -2.127725 | 0.953308  |
| C  | -3.439723 | -2.216349 | 0.463754  |
| C  | -2.591611 | -0.994058 | 0.471605  |
| C  | -3.343747 | 0.292098  | 0.497268  |
| C  | -4.593480 | 0.336675  | 1.216788  |
| C  | -5.243931 | 1.589572  | 1.650344  |
| O  | -4.769836 | 2.690835  | 1.555950  |
| N  | -2.795566 | 1.231538  | -0.214211 |
| H  | -6.225468 | -0.854186 | 1.867111  |
| H  | -5.319283 | -3.024433 | 1.047316  |
| H  | -2.990235 | -3.179619 | 0.195428  |
| H  | -2.116585 | -1.056207 | 1.490061  |
| H  | -6.254231 | 1.422389  | 2.116759  |
| C  | -1.721362 | 0.671394  | -0.902273 |
| C  | -1.493471 | -0.682435 | -0.527242 |
| Au | 0.170746  | 0.434150  | 0.616471  |
| C  | 1.833312  | 1.146748  | 1.596132  |
| N  | 2.778984  | 1.929041  | 1.033192  |
| C  | 3.825436  | 2.121030  | 1.911692  |
| C  | 3.512748  | 1.444155  | 3.048101  |
| N  | 2.283428  | 0.853468  | 2.832845  |
| C  | 1.608410  | 0.014586  | 3.804430  |
| C  | 2.735077  | 2.433168  | -0.329060 |
| H  | 4.691982  | 2.731099  | 1.656176  |
| H  | 4.045240  | 1.342470  | 3.993744  |
| H  | 1.399636  | 0.586834  | 4.723978  |
| H  | 0.658698  | -0.337336 | 3.370749  |
| H  | 2.238514  | -0.857258 | 4.052616  |
| H  | 3.451579  | 3.264039  | -0.426418 |
| H  | 2.999786  | 1.631448  | -1.043215 |
| H  | 1.721691  | 2.802641  | -0.561586 |
| C  | -1.084165 | 1.485993  | -1.948528 |
| N  | -0.936386 | -1.671664 | -1.378493 |
| S  | 0.013941  | -2.894505 | -0.668794 |
| C  | -1.715516 | -2.003953 | -2.573307 |
| H  | -1.213249 | -2.813620 | -3.124448 |
| H  | -2.741870 | -2.335077 | -2.318283 |
| H  | -1.775615 | -1.114305 | -3.226161 |
| O  | 0.003269  | -4.002736 | -1.610033 |
| C  | 1.645984  | -2.197466 | -0.614818 |
| O  | -0.430897 | -3.078034 | 0.712522  |
| C  | 2.315859  | -2.115903 | 0.602628  |
| C  | 3.593173  | -1.560470 | 0.634750  |
| C  | 4.207446  | -1.092837 | -0.532193 |
| C  | 3.518499  | -1.220316 | -1.750713 |
| C  | 2.249800  | -1.781523 | -1.802782 |
| H  | 1.828690  | -2.475789 | 1.515760  |
| H  | 4.126725  | -1.486616 | 1.591650  |
| C  | 5.580552  | -0.497454 | -0.502428 |
| H  | 3.999403  | -0.880417 | -2.676743 |
| H  | 1.729467  | -1.899658 | -2.761573 |
| H  | 5.638768  | 0.417353  | -1.121672 |
| H  | 5.896198  | -0.245554 | 0.525063  |
| H  | 6.325838  | -1.205087 | -0.914040 |
| C  | -0.050850 | 0.993222  | -2.766217 |
| C  | 0.538768  | 1.808930  | -3.723079 |
| C  | 0.108544  | 3.128595  | -3.881226 |
| C  | -0.916696 | 3.625724  | -3.078014 |
| C  | -1.512242 | 2.812871  | -2.117994 |
| H  | 0.297339  | -0.036304 | -2.639061 |
| H  | 1.340578  | 1.411477  | -4.355836 |

|   |           |          |           |
|---|-----------|----------|-----------|
| H | 0.572999  | 3.769964 | -4.638599 |
| H | -1.259947 | 4.658574 | -3.201628 |
| H | -2.317624 | 3.192233 | -1.481869 |

**TS<sub>5a2syn</sub>**  
65

scf done: -2059.819176

|    |           |           |           |
|----|-----------|-----------|-----------|
| C  | 2.297998  | 3.603454  | 1.369778  |
| C  | 2.993340  | 2.928442  | 0.301505  |
| C  | 2.448889  | 1.852326  | -0.312500 |
| C  | 1.068557  | 1.444088  | 0.066986  |
| C  | 0.644037  | 1.877421  | 1.431131  |
| C  | 1.138431  | 3.137815  | 1.932086  |
| C  | 0.526251  | 3.865747  | 3.063065  |
| O  | -0.499627 | 3.565602  | 3.613451  |
| N  | -0.106147 | 1.013960  | 2.043689  |
| H  | 2.739860  | 4.521850  | 1.780904  |
| H  | 3.970185  | 3.308916  | -0.015601 |
| H  | 2.957538  | 1.364571  | -1.153726 |
| H  | 0.442821  | 2.092787  | -0.610567 |
| H  | 1.111142  | 4.777963  | 3.366220  |
| C  | -0.162484 | -0.138308 | 1.264018  |
| C  | 0.509417  | 0.031063  | 0.020161  |
| Au | -1.713911 | 0.261672  | -0.618515 |
| C  | -3.636666 | 0.409858  | -1.324355 |
| N  | -4.700573 | -0.182258 | -0.740795 |
| C  | -5.850975 | 0.099433  | -1.447417 |
| C  | -5.486208 | 0.884998  | -2.494377 |
| N  | -4.120141 | 1.063738  | -2.400408 |
| C  | -3.343009 | 1.851747  | -3.337485 |
| C  | -4.633566 | -1.000501 | 0.460080  |
| H  | -6.825527 | -0.281888 | -1.142341 |
| H  | -6.074203 | 1.333919  | -3.294759 |
| H  | -3.692019 | 2.897941  | -3.334743 |
| H  | -2.284714 | 1.821491  | -3.034538 |
| H  | -3.441324 | 1.437399  | -4.354778 |
| H  | -4.184687 | -0.425903 | 1.288120  |
| H  | -5.654239 | -1.301562 | 0.740728  |
| H  | -4.025317 | -1.903797 | 0.278416  |
| C  | -0.856375 | -1.305313 | 1.828518  |
| N  | 1.087026  | -1.005060 | -0.740259 |
| S  | 2.318567  | -1.963813 | -0.020125 |
| C  | 1.062857  | -0.953126 | -2.192555 |
| H  | 1.407994  | -1.918621 | -2.597866 |
| H  | 0.021270  | -0.805768 | -2.533304 |
| H  | 1.690064  | -0.138978 | -2.613793 |
| C  | 3.870022  | -1.239429 | -0.478791 |
| O  | 2.147014  | -1.789581 | 1.414866  |
| O  | 2.211822  | -3.262239 | -0.667995 |
| C  | -0.943200 | -2.542298 | 1.161814  |
| C  | -1.653817 | -3.592336 | 1.726255  |
| C  | -2.285466 | -3.432963 | 2.963466  |
| C  | -2.200197 | -2.215044 | 3.633597  |
| C  | -1.490932 | -1.156596 | 3.072055  |
| H  | -0.442933 | -2.688308 | 0.198714  |
| H  | -1.705515 | -4.552986 | 1.202396  |
| H  | -2.838487 | -4.268186 | 3.407826  |
| H  | -2.685216 | -2.086720 | 4.607462  |
| H  | -1.416792 | -0.196043 | 3.590394  |
| C  | 4.401678  | -1.477471 | -1.747600 |

|   |          |           |           |
|---|----------|-----------|-----------|
| C | 5.598782 | -0.864711 | -2.098967 |
| C | 6.286727 | -0.040983 | -1.195574 |
| C | 5.739265 | 0.157244  | 0.078709  |
| C | 4.535357 | -0.435055 | 0.445827  |
| H | 3.893094 | -2.148516 | -2.448327 |
| H | 6.023510 | -1.040968 | -3.094850 |
| C | 7.598550 | 0.571983  | -1.572541 |
| H | 6.273564 | 0.785811  | 0.802053  |
| H | 4.110759 | -0.282599 | 1.444297  |
| H | 7.804947 | 1.487668  | -0.991520 |
| H | 8.429179 | -0.133013 | -1.373831 |
| H | 7.638556 | 0.820630  | -2.647816 |

### 5a2<sub>syn</sub>

65

scf done: -2059.833853

|    |           |           |           |
|----|-----------|-----------|-----------|
| C  | 0.074092  | 3.213438  | 2.013152  |
| C  | -0.743986 | 3.503457  | 3.052553  |
| C  | -1.651109 | 2.510422  | 3.565880  |
| C  | -1.864651 | 1.291326  | 2.970452  |
| C  | -1.147065 | 1.047182  | 1.743229  |
| C  | 0.095139  | 1.825713  | 1.483573  |
| H  | 0.853649  | 1.333774  | 2.157468  |
| N  | -1.486967 | 0.267500  | 0.759422  |
| H  | 0.798027  | 3.942116  | 1.626770  |
| H  | -0.718353 | 4.490416  | 3.524983  |
| H  | -2.241276 | 2.756042  | 4.459816  |
| C  | -2.884345 | 0.383868  | 3.528836  |
| C  | -0.646231 | 0.550351  | -0.294870 |
| C  | 0.430011  | 1.457997  | 0.035096  |
| Au | 1.910048  | -0.215384 | 0.150589  |
| C  | 3.261425  | -1.768778 | 0.313670  |
| N  | 4.566516  | -1.784441 | -0.034329 |
| C  | 5.121402  | -3.020670 | 0.231013  |
| C  | 4.130379  | -3.787018 | 0.756351  |
| N  | 2.996956  | -3.001475 | 0.797164  |
| C  | 1.708194  | -3.431653 | 1.317581  |
| C  | 5.304566  | -0.672399 | -0.599901 |
| H  | 6.166140  | -3.244255 | 0.015133  |
| H  | 4.129231  | -4.822279 | 1.097291  |
| H  | 1.717160  | -4.527705 | 1.419648  |
| H  | 1.526530  | -2.980568 | 2.308258  |
| H  | 0.896896  | -3.138876 | 0.629623  |
| H  | 4.597004  | 0.135545  | -0.845051 |
| H  | 6.050666  | -0.297799 | 0.121586  |
| H  | 5.818948  | -0.992345 | -1.521164 |
| N  | -0.902247 | -0.041463 | -1.481452 |
| C  | 0.871846  | 2.595019  | -0.833611 |
| O  | -3.180566 | -0.699665 | 3.094797  |
| H  | -3.377880 | 0.794422  | 4.452004  |
| C  | -0.075377 | 0.234565  | -2.644260 |
| S  | -1.688940 | -1.649578 | -1.445619 |
| O  | -1.551471 | -2.104045 | -2.819177 |
| C  | -3.387515 | -1.344811 | -1.109075 |
| O  | -1.060651 | -2.384015 | -0.358723 |
| H  | 0.988201  | -0.015830 | -2.436626 |
| H  | -0.428308 | -0.377511 | -3.485913 |
| H  | -0.145947 | 1.300137  | -2.914585 |
| C  | 2.215207  | 2.965985  | -0.959055 |
| C  | 2.578118  | 4.096248  | -1.690891 |

|   |           |           |           |
|---|-----------|-----------|-----------|
| C | 1.601558  | 4.874125  | -2.309869 |
| C | 0.257867  | 4.523137  | -2.183026 |
| C | -0.102847 | 3.399685  | -1.442906 |
| H | 2.991187  | 2.358266  | -0.473271 |
| H | 3.635684  | 4.368648  | -1.780661 |
| H | 1.887375  | 5.758214  | -2.890398 |
| H | -0.517904 | 5.131513  | -2.661385 |
| H | -1.164726 | 3.135663  | -1.336454 |
| C | -4.219673 | -0.993601 | -2.174311 |
| C | -5.572503 | -0.806307 | -1.922801 |
| C | -6.100468 | -0.971794 | -0.633349 |
| C | -5.234559 | -1.334979 | 0.406467  |
| C | -3.876291 | -1.525002 | 0.182474  |
| H | -3.816167 | -0.885999 | -3.186782 |
| H | -6.242423 | -0.537899 | -2.748778 |
| C | -7.556587 | -0.745313 | -0.374510 |
| H | -5.628078 | -1.472412 | 1.421134  |
| H | -3.206069 | -1.783836 | 1.006008  |
| H | -7.908026 | -1.316414 | 0.502402  |
| H | -7.757007 | 0.324649  | -0.169603 |
| H | -8.173149 | -1.027318 | -1.246263 |

# **TS5a2anti**

65

scf done: -2059.802044

|    |           |           |           |
|----|-----------|-----------|-----------|
| C  | 2.350004  | -1.257501 | 3.335123  |
| C  | 3.450043  | -0.491792 | 2.885584  |
| C  | 3.231402  | 0.734382  | 2.304606  |
| C  | 1.903659  | 1.237327  | 2.188292  |
| C  | 0.797329  | 0.450605  | 2.633656  |
| C  | 1.036843  | -0.833675 | 3.189772  |
| C  | -0.040928 | -1.828639 | 3.394873  |
| O  | -1.104940 | -1.826539 | 2.828141  |
| N  | -0.434968 | 0.893925  | 2.299369  |
| H  | 2.531491  | -2.254442 | 3.759219  |
| H  | 4.466265  | -0.878899 | 3.009808  |
| H  | 4.070193  | 1.354866  | 1.968193  |
| H  | 1.789969  | 2.327174  | 2.227051  |
| H  | 0.239811  | -2.662030 | 4.094830  |
| C  | -0.358045 | 1.502537  | 1.143934  |
| C  | 0.896209  | 1.391492  | 0.360468  |
| Au | 1.150009  | -0.583205 | -0.410393 |
| C  | 1.313987  | -2.503331 | -1.153210 |
| N  | 2.390473  | -3.079930 | -1.730373 |
| C  | 2.101223  | -4.375012 | -2.112849 |
| C  | 0.808797  | -4.604721 | -1.761533 |
| N  | 0.345927  | -3.444618 | -1.173797 |
| C  | -0.998650 | -3.240770 | -0.663383 |
| C  | 3.667911  | -2.416657 | -1.916303 |
| H  | 2.836178  | -5.015086 | -2.600621 |
| H  | 0.180047  | -5.487016 | -1.880133 |
| H  | -1.576951 | -4.168184 | -0.797948 |
| H  | -0.967265 | -2.985422 | 0.410812  |
| H  | -1.495073 | -2.423027 | -1.214859 |
| H  | 4.353298  | -3.097710 | -2.443861 |
| H  | 3.536658  | -1.500838 | -2.517167 |
| H  | 4.105567  | -2.148842 | -0.939402 |
| N  | -1.463818 | 2.191027  | 0.682544  |
| C  | 1.446224  | 2.549194  | -0.344840 |
| S  | -2.072769 | 1.893357  | -0.901688 |

|   |           |           |           |
|---|-----------|-----------|-----------|
| C | -2.457823 | 2.630228  | 1.659803  |
| H | -3.187740 | 3.277769  | 1.147667  |
| H | -2.974153 | 1.778162  | 2.138899  |
| H | -1.947380 | 3.222190  | 2.437559  |
| O | -2.684565 | 3.124246  | -1.363818 |
| O | -0.981004 | 1.273022  | -1.639680 |
| C | -3.337687 | 0.697721  | -0.569038 |
| C | -4.604566 | 0.891044  | -1.113750 |
| C | -5.588819 | -0.064316 | -0.875062 |
| C | -5.330594 | -1.191042 | -0.085517 |
| C | -4.046323 | -1.348556 | 0.458612  |
| C | -3.043149 | -0.418446 | 0.219141  |
| H | -4.813653 | 1.781174  | -1.716451 |
| H | -6.587423 | 0.072582  | -1.307326 |
| C | -6.408314 | -2.186735 | 0.208093  |
| H | -3.829091 | -2.215349 | 1.096246  |
| H | -2.058159 | -0.555567 | 0.687373  |
| H | -6.900421 | -1.957261 | 1.173344  |
| H | -7.193506 | -2.179422 | -0.567675 |
| H | -6.004922 | -3.211690 | 0.289159  |
| C | 2.418481  | 2.355787  | -1.344195 |
| C | 2.983068  | 3.433386  | -2.016175 |
| C | 2.587749  | 4.732425  | -1.699106 |
| C | 1.632734  | 4.950054  | -0.702222 |
| C | 1.073025  | 3.873281  | -0.030017 |
| H | 2.724538  | 1.330865  | -1.593444 |
| H | 3.732574  | 3.260864  | -2.795911 |
| H | 3.027624  | 5.584144  | -2.229788 |
| H | 1.325018  | 5.970478  | -0.450077 |
| H | 0.328161  | 4.061728  | 0.752638  |

### 5a2<sub>anti</sub>

65

scf done: -2059.838396

|    |           |           |           |
|----|-----------|-----------|-----------|
| C  | -1.124081 | 1.486788  | 2.919639  |
| C  | -0.982429 | 0.809905  | 4.081103  |
| C  | 0.153787  | -0.052597 | 4.283042  |
| C  | 1.090646  | -0.335197 | 3.320555  |
| C  | 0.891626  | 0.257168  | 2.019805  |
| C  | -0.066478 | 1.392326  | 1.887639  |
| H  | 0.573590  | 2.295760  | 2.090289  |
| N  | 1.399025  | -0.120768 | 0.880608  |
| H  | -1.961065 | 2.177176  | 2.750999  |
| H  | -1.714407 | 0.916324  | 4.887707  |
| H  | 0.261240  | -0.544043 | 5.260095  |
| C  | 2.171802  | -1.286384 | 3.646277  |
| C  | 0.751773  | 0.594775  | -0.106500 |
| C  | -0.334160 | 1.422711  | 0.379813  |
| Au | -1.851468 | -0.157890 | -0.039596 |
| C  | -3.273377 | -1.605746 | -0.406803 |
| N  | -4.613404 | -1.432834 | -0.429266 |
| C  | -5.247677 | -2.618708 | -0.740314 |
| C  | -4.272388 | -3.548887 | -0.908680 |
| N  | -3.067851 | -2.906825 | -0.701976 |
| C  | -1.778974 | -3.576332 | -0.754515 |
| C  | -5.287150 | -0.164256 | -0.224869 |
| H  | -6.332526 | -2.692521 | -0.814714 |
| H  | -4.325166 | -4.609263 | -1.155096 |
| H  | -1.757232 | -4.254693 | -1.622693 |
| H  | -0.971400 | -2.833873 | -0.861090 |



|   |           |           |           |
|---|-----------|-----------|-----------|
| H | -1.613344 | -4.161662 | 0.166138  |
| H | -4.804083 | 0.382797  | 0.601108  |
| H | -5.247742 | 0.451177  | -1.140721 |
| H | -6.339701 | -0.353817 | 0.037762  |
| N | 1.143345  | 0.430156  | -1.383004 |
| C | -0.660978 | 2.777897  | -0.175135 |
| O | 3.042084  | -1.655533 | 2.901907  |
| H | 2.125697  | -1.650538 | 4.709601  |
| C | 0.465479  | 1.115838  | -2.473217 |
| S | 2.052789  | -1.057213 | -1.813747 |
| H | -0.630085 | 0.957746  | -2.403023 |
| H | 0.675687  | 2.197271  | -2.442005 |
| H | 0.826528  | 0.704928  | -3.426560 |
| O | 2.099179  | -0.990332 | -3.264980 |
| C | 3.670553  | -0.795148 | -1.178927 |
| O | 1.382317  | -2.161869 | -1.150319 |
| C | -1.972982 | 3.187173  | -0.436141 |
| C | -2.242337 | 4.480401  | -0.884928 |
| C | -1.202028 | 5.386529  | -1.076046 |
| C | 0.110756  | 4.997119  | -0.807877 |
| C | 0.374417  | 3.707908  | -0.354551 |
| H | -2.799238 | 2.476677  | -0.291120 |
| H | -3.276335 | 4.780369  | -1.088661 |
| H | -1.413277 | 6.400961  | -1.431993 |
| H | 0.935400  | 5.704285  | -0.951236 |
| H | 1.411068  | 3.407498  | -0.140536 |
| C | 4.052106  | -1.403202 | 0.013622  |
| C | 5.349500  | -1.203857 | 0.470019  |
| C | 6.259652  | -0.415638 | -0.245530 |
| C | 5.838363  | 0.182184  | -1.443582 |
| C | 4.549314  | -0.004256 | -1.923562 |
| H | 3.340436  | -1.997106 | 0.591052  |
| H | 5.654939  | -1.666831 | 1.416085  |
| C | 7.662645  | -0.235777 | 0.241638  |
| H | 6.542180  | 0.801816  | -2.012566 |
| H | 4.229791  | 0.450177  | -2.867477 |
| H | 8.082454  | 0.736337  | -0.071658 |
| H | 7.724023  | -0.308363 | 1.341666  |
| H | 8.323166  | -1.022514 | -0.172602 |

# TS<sub>6a1syn</sub>

65

scf done: -2059.797200

|    |           |           |           |
|----|-----------|-----------|-----------|
| C  | -0.741812 | 4.838169  | 0.800105  |
| C  | -0.747008 | 4.618630  | -0.609032 |
| C  | -0.529543 | 3.374155  | -1.138924 |
| C  | -0.304223 | 2.290055  | -0.243866 |
| C  | -0.289161 | 2.495817  | 1.195093  |
| C  | -0.516668 | 3.832941  | 1.708593  |
| C  | -0.530033 | 4.143007  | 3.158564  |
| O  | -0.480751 | 3.329800  | 4.040298  |
| N  | 0.181255  | 1.382549  | 1.844222  |
| H  | -0.917064 | 5.853015  | 1.178723  |
| H  | -0.912356 | 5.471385  | -1.275291 |
| H  | -0.470889 | 3.205551  | -2.220196 |
| H  | -1.406706 | 2.254239  | 0.628282  |
| H  | -0.611518 | 5.243744  | 3.370051  |
| C  | 0.468831  | 0.477075  | 0.927831  |
| C  | 0.110381  | 0.897921  | -0.445556 |
| Au | -1.786120 | -0.287942 | -0.412157 |

|   |           |           |           |
|---|-----------|-----------|-----------|
| C | -3.459127 | -1.473197 | -0.245368 |
| N | -4.604275 | -1.469333 | -0.958720 |
| C | -5.458609 | -2.452594 | -0.500272 |
| C | -4.821286 | -3.078350 | 0.523474  |
| N | -3.594569 | -2.463027 | 0.664099  |
| C | -2.590364 | -2.813424 | 1.656553  |
| C | -4.916849 | -0.575113 | -2.056969 |
| H | -6.440777 | -2.616947 | -0.942963 |
| H | -5.132514 | -3.904260 | 1.163037  |
| H | -1.641434 | -3.085990 | 1.163110  |
| H | -2.412378 | -1.963695 | 2.337627  |
| H | -2.952539 | -3.673099 | 2.240473  |
| H | -5.838539 | -0.011476 | -1.835228 |
| H | -4.081641 | 0.130877  | -2.186857 |
| H | -5.056597 | -1.149138 | -2.988524 |
| C | 1.032256  | -0.822156 | 1.329938  |
| N | 0.903779  | 0.618634  | -1.597057 |
| C | 0.380678  | -0.005826 | -2.798531 |
| S | 2.436874  | 1.364936  | -1.643278 |
| C | 3.562996  | 0.131747  | -1.059328 |
| O | 2.371629  | 2.433557  | -0.647421 |
| O | 2.728244  | 1.643264  | -3.042356 |
| H | 1.135632  | 0.051021  | -3.599329 |
| H | -0.524972 | 0.520179  | -3.161562 |
| H | 0.127883  | -1.071370 | -2.626234 |
| C | 1.309377  | -1.839269 | 0.404212  |
| C | 1.862383  | -3.044021 | 0.825076  |
| C | 2.140154  | -3.252544 | 2.176969  |
| C | 1.864085  | -2.248584 | 3.105669  |
| C | 1.315716  | -1.040813 | 2.686016  |
| H | 1.107969  | -1.685245 | -0.661119 |
| H | 2.083841  | -3.826039 | 0.089422  |
| H | 2.574440  | -4.203107 | 2.507937  |
| H | 2.079684  | -2.408160 | 4.168021  |
| H | 1.097814  | -0.241689 | 3.402206  |
| C | 3.970095  | -0.878185 | -1.931222 |
| C | 4.775485  | -1.900494 | -1.441909 |
| C | 5.182078  | -1.923949 | -0.100570 |
| C | 4.782726  | -0.876717 | 0.739594  |
| C | 3.972379  | 0.151570  | 0.273046  |
| H | 3.669955  | -0.857138 | -2.985363 |
| H | 5.106140  | -2.698442 | -2.118172 |
| C | 6.002771  | -3.054221 | 0.435801  |
| H | 5.111393  | -0.871583 | 1.786464  |
| H | 3.656979  | 0.966559  | 0.934064  |
| H | 5.356607  | -3.791667 | 0.952967  |
| H | 6.538722  | -3.590571 | -0.366526 |
| H | 6.743855  | -2.703023 | 1.175887  |

### 6a1<sub>syn</sub>

65

scf done: -2059.816668

|   |           |           |           |
|---|-----------|-----------|-----------|
| C | -2.706369 | -2.012252 | 2.134061  |
| C | -2.554931 | -2.514626 | 0.784872  |
| C | -1.639920 | -1.983180 | -0.064747 |
| C | -0.842403 | -0.870513 | 0.398528  |
| C | -0.675972 | -0.609797 | 1.875286  |
| C | -1.860070 | -1.100359 | 2.668959  |
| C | -1.939210 | -0.794131 | 4.107082  |
| O | -1.056046 | -0.280743 | 4.744411  |

|    |           |           |           |
|----|-----------|-----------|-----------|
| N  | -0.221782 | 0.749158  | 2.013276  |
| H  | -3.509291 | -2.422190 | 2.762119  |
| H  | -3.220379 | -3.313676 | 0.439189  |
| H  | -1.581076 | -2.324625 | -1.103474 |
| H  | 0.163059  | -1.220503 | 2.301563  |
| H  | -2.903962 | -1.118890 | 4.585103  |
| C  | -0.029549 | 1.246749  | 0.837760  |
| C  | -0.462116 | 0.307244  | -0.257810 |
| Au | 1.531578  | -0.930732 | -0.242564 |
| C  | 3.554929  | -1.245897 | -0.302838 |
| N  | 4.275732  | -2.189658 | -0.939717 |
| C  | 5.623414  | -1.976743 | -0.733308 |
| C  | 5.730074  | -0.871640 | 0.051662  |
| N  | 4.447136  | -0.437537 | 0.307755  |
| C  | 4.102385  | 0.737617  | 1.096248  |
| C  | 3.735841  | -3.281035 | -1.728371 |
| H  | 6.383532  | -2.632848 | -1.157695 |
| H  | 6.604881  | -0.359859 | 0.452649  |
| H  | 3.732902  | 1.550632  | 0.445377  |
| H  | 3.321169  | 0.482818  | 1.832003  |
| H  | 5.000632  | 1.079900  | 1.632132  |
| H  | 4.091548  | -4.245814 | -1.330496 |
| H  | 2.636804  | -3.248482 | -1.670027 |
| H  | 4.049686  | -3.182387 | -2.781033 |
| C  | 0.700360  | 2.512805  | 0.650361  |
| N  | -0.787447 | 0.710510  | -1.566650 |
| C  | -0.615638 | -0.182639 | -2.703410 |
| S  | -2.153164 | 1.774475  | -1.664589 |
| C  | -3.504117 | 0.740834  | -1.179977 |
| O  | -1.954344 | 2.779300  | -0.635896 |
| O  | -2.265099 | 2.109091  | -3.072368 |
| H  | -0.724568 | 0.401815  | -3.629925 |
| H  | 0.410471  | -0.595018 | -2.679403 |
| H  | -1.341277 | -1.021837 | -2.729811 |
| C  | 1.232302  | 2.895172  | -0.589240 |
| C  | 2.014780  | 4.042383  | -0.694404 |
| C  | 2.266888  | 4.824797  | 0.431666  |
| C  | 1.734019  | 4.454268  | 1.667648  |
| C  | 0.960497  | 3.304589  | 1.777632  |
| H  | 1.028110  | 2.296049  | -1.482668 |
| H  | 2.423760  | 4.332806  | -1.668644 |
| H  | 2.876551  | 5.731417  | 0.345512  |
| H  | 1.924616  | 5.068927  | 2.554522  |
| H  | 0.549179  | 2.993872  | 2.743844  |
| C  | -3.926077 | 0.766643  | 0.150622  |
| C  | -4.924695 | -0.111314 | 0.550301  |
| C  | -5.507209 | -1.011320 | -0.353652 |
| C  | -5.086239 | -0.988289 | -1.690229 |
| C  | -4.091095 | -0.114220 | -2.114823 |
| H  | -3.476664 | 1.473721  | 0.857462  |
| H  | -5.268348 | -0.099095 | 1.592803  |
| C  | -6.561986 | -1.963308 | 0.115803  |
| H  | -5.556271 | -1.665116 | -2.413828 |
| H  | -3.778885 | -0.084035 | -3.164994 |
| H  | -6.867856 | -2.665937 | -0.677973 |
| H  | -6.205726 | -2.553628 | 0.982381  |
| H  | -7.465570 | -1.421288 | 0.453396  |

TS<sub>6a1anti</sub>

scf done: -2059.806289

|    |           |           |           |
|----|-----------|-----------|-----------|
| C  | -1.647089 | 4.530475  | 0.013973  |
| C  | -1.356213 | 4.096544  | -1.311066 |
| C  | -0.777717 | 2.876584  | -1.545436 |
| C  | -0.433821 | 2.059759  | -0.424867 |
| C  | -0.663506 | 2.526245  | 0.933638  |
| C  | -1.343301 | 3.785153  | 1.129507  |
| C  | -1.720806 | 4.302595  | 2.466722  |
| O  | -1.512931 | 3.752604  | 3.513145  |
| N  | -0.303735 | 1.576454  | 1.859389  |
| H  | -2.140040 | 5.500631  | 0.155986  |
| H  | -1.612557 | 4.748682  | -2.151951 |
| H  | -0.577839 | 2.521894  | -2.562750 |
| H  | 0.444388  | 2.816878  | 0.288350  |
| H  | -2.243374 | 5.297021  | 2.415252  |
| C  | 0.203053  | 0.562844  | 1.187203  |
| C  | 0.102240  | 0.705067  | -0.281274 |
| Au | -1.770256 | -0.477565 | -0.460934 |
| C  | -3.473713 | -1.633910 | -0.478586 |
| N  | -4.397051 | -1.811662 | -1.446303 |
| C  | -5.383032 | -2.678436 | -1.017510 |
| C  | -5.055484 | -3.047151 | 0.248451  |
| N  | -3.880427 | -2.395566 | 0.560731  |
| C  | -3.160728 | -2.524234 | 1.817686  |
| C  | -4.391000 | -1.175178 | -2.749115 |
| H  | -6.226321 | -2.953432 | -1.650965 |
| H  | -5.553212 | -3.714035 | 0.952294  |
| H  | -3.761149 | -3.131755 | 2.511886  |
| H  | -2.186921 | -3.017503 | 1.654797  |
| H  | -2.991556 | -1.529283 | 2.262716  |
| H  | -5.214946 | -0.445250 | -2.824420 |
| H  | -3.430154 | -0.654758 | -2.884863 |
| H  | -4.506448 | -1.936136 | -3.538695 |
| C  | 0.853807  | -0.551263 | 1.883192  |
| N  | 1.175812  | 0.254272  | -1.114737 |
| C  | 0.947507  | -0.453908 | -2.362346 |
| S  | 2.528565  | 1.291692  | -1.114240 |
| C  | 3.910868  | 0.213205  | -0.907713 |
| O  | 2.624790  | 1.946671  | -2.414050 |
| O  | 2.360941  | 2.101603  | 0.101098  |
| H  | 1.915424  | -0.767687 | -2.792985 |
| H  | 0.415950  | 0.157499  | -3.119423 |
| H  | 0.362688  | -1.369802 | -2.162346 |
| C  | 4.737209  | -0.048605 | -1.999068 |
| C  | 5.819296  | -0.905924 | -1.827134 |
| C  | 6.087799  | -1.493678 | -0.584595 |
| C  | 5.238279  | -1.203919 | 0.494009  |
| C  | 4.152289  | -0.351438 | 0.346299  |
| H  | 4.534750  | 0.422938  | -2.966785 |
| H  | 6.476723  | -1.122068 | -2.678029 |
| C  | 7.274798  | -2.385948 | -0.401233 |
| H  | 5.437170  | -1.656185 | 1.473683  |
| H  | 3.499595  | -0.122336 | 1.197713  |
| H  | 8.159800  | -1.798680 | -0.087273 |
| H  | 7.097232  | -3.145072 | 0.380745  |
| H  | 7.545134  | -2.903323 | -1.338374 |
| C  | 1.098358  | -1.784357 | 1.258643  |
| C  | 1.757907  | -2.800145 | 1.942268  |
| C  | 2.190357  | -2.593333 | 3.253242  |
| C  | 1.950335  | -1.371406 | 3.882919  |

|   |          |           |          |
|---|----------|-----------|----------|
| C | 1.282690 | -0.356497 | 3.204578 |
| H | 0.767423 | -1.953890 | 0.227543 |
| H | 1.940793 | -3.760583 | 1.447837 |
| H | 2.715713 | -3.392174 | 3.788992 |
| H | 2.287381 | -1.208118 | 4.912445 |
| H | 1.090660 | 0.610752  | 3.680821 |

# 6a1<sub>anti</sub>

65

scf done: -2059.819204

|    |           |           |           |
|----|-----------|-----------|-----------|
| N  | 0.249296  | 0.648553  | 2.130586  |
| C  | 0.098305  | 1.289682  | 1.016185  |
| C  | -0.651011 | 0.484199  | -0.014505 |
| C  | -0.948524 | -0.730049 | 0.619943  |
| C  | -1.628945 | -1.932218 | 0.237943  |
| C  | -1.434844 | -3.037123 | 1.016299  |
| C  | -0.530191 | -3.022256 | 2.140014  |
| C  | 0.027648  | -1.873812 | 2.613718  |
| C  | -0.461957 | -0.590531 | 2.024559  |
| C  | 1.000801  | -1.949345 | 3.719205  |
| O  | 1.568766  | -1.015019 | 4.221902  |
| H  | 1.194689  | -3.005064 | 4.056541  |
| H  | -0.270414 | -3.976607 | 2.616332  |
| H  | -1.916477 | -3.982572 | 0.744048  |
| H  | -2.227912 | -1.982550 | -0.679116 |
| C  | 0.724193  | 2.600762  | 0.792433  |
| H  | -1.424237 | -0.403856 | 2.582395  |
| Au | 1.321456  | -0.630799 | -0.545663 |
| C  | 3.272780  | -1.133946 | -0.898878 |
| N  | 4.292619  | -0.610384 | -0.184957 |
| C  | 5.494252  | -1.104164 | -0.644783 |
| C  | 5.206204  | -1.953257 | -1.667048 |
| N  | 3.833493  | -1.955629 | -1.807951 |
| C  | 3.119401  | -2.738729 | -2.798074 |
| C  | 4.138817  | 0.365428  | 0.886113  |
| H  | 6.447277  | -0.809794 | -0.205490 |
| H  | 5.852975  | -2.555165 | -2.305105 |
| H  | 3.459789  | -2.466526 | -3.810974 |
| H  | 2.043193  | -2.524695 | -2.706500 |
| H  | 3.294114  | -3.814754 | -2.631394 |
| H  | 3.784244  | 1.329562  | 0.479879  |
| H  | 3.413522  | 0.002020  | 1.634398  |
| H  | 5.114349  | 0.513765  | 1.373526  |
| N  | -1.295320 | 1.027617  | -1.148380 |
| S  | -2.726325 | 1.894926  | -0.797444 |
| O  | -2.461585 | 2.556599  | 0.470871  |
| O  | -3.053992 | 2.623246  | -2.010162 |
| C  | -3.945623 | 0.639016  | -0.523404 |
| C  | -1.151330 | 0.443560  | -2.471201 |
| H  | -1.725486 | 1.052872  | -3.188109 |
| H  | -1.499323 | -0.608494 | -2.530472 |
| C  | 0.881204  | 3.148210  | -0.488953 |
| C  | 1.557347  | 4.353885  | -0.658329 |
| C  | 2.073477  | 5.028840  | 0.446525  |
| C  | 1.914967  | 4.493005  | 1.726034  |
| C  | 1.247805  | 3.286293  | 1.898439  |
| H  | 0.466143  | 2.634414  | -1.362152 |
| H  | 1.674346  | 4.773667  | -1.663512 |
| H  | 2.598284  | 5.981364  | 0.311379  |
| H  | 2.314745  | 5.023957  | 2.597130  |

|   |           |           |           |
|---|-----------|-----------|-----------|
| H | 1.122724  | 2.848875  | 2.894498  |
| C | -4.219779 | 0.230037  | 0.781650  |
| C | -5.130009 | -0.801801 | 0.986954  |
| C | -5.771303 | -1.427114 | -0.090497 |
| C | -5.481790 | -0.986262 | -1.390542 |
| C | -4.579960 | 0.046911  | -1.617388 |
| H | -3.736024 | 0.736032  | 1.625151  |
| H | -5.359867 | -1.124671 | 2.009872  |
| C | -6.778653 | -2.509351 | 0.139581  |
| H | -5.990012 | -1.456203 | -2.241504 |
| H | -4.382341 | 0.405384  | -2.634014 |
| H | -6.788998 | -3.240446 | -0.688095 |
| H | -6.590906 | -3.049095 | 1.084216  |
| H | -7.798952 | -2.083981 | 0.206207  |
| H | -0.089125 | 0.487900  | -2.780614 |

# TS<sub>6a2syn</sub>

65

scf done: -2059.802723

|    |           |           |           |
|----|-----------|-----------|-----------|
| C  | 0.893032  | 2.461508  | 3.813207  |
| C  | -0.255763 | 3.158949  | 3.338281  |
| C  | -0.800706 | 2.888113  | 2.109320  |
| C  | -0.203143 | 1.874927  | 1.305630  |
| C  | 0.979882  | 1.152689  | 1.775061  |
| C  | 1.527692  | 1.489034  | 3.078724  |
| C  | 2.722907  | 0.822103  | 3.645368  |
| O  | 3.294559  | -0.117093 | 3.160113  |
| N  | 1.531783  | 0.421195  | 0.765553  |
| H  | 1.295179  | 2.713990  | 4.802444  |
| H  | -0.702657 | 3.932428  | 3.971182  |
| H  | -1.658557 | 3.448240  | 1.720541  |
| H  | -0.148129 | 0.699442  | 2.114770  |
| H  | 3.058367  | 1.276145  | 4.616414  |
| C  | 0.776148  | 0.602914  | -0.303753 |
| C  | -0.424543 | 1.443285  | -0.070757 |
| Au | -1.867056 | -0.258421 | 0.128497  |
| C  | -3.174762 | -1.839288 | 0.278201  |
| N  | -4.496807 | -1.815957 | 0.001172  |
| C  | -5.049300 | -3.066367 | 0.190196  |
| C  | -4.040362 | -3.880026 | 0.597631  |
| N  | -2.897278 | -3.108197 | 0.642245  |
| C  | -1.597828 | -3.595879 | 1.077129  |
| C  | -5.221567 | -0.644955 | -0.458228 |
| H  | -6.105669 | -3.266329 | 0.012324  |
| H  | -4.032098 | -4.938862 | 0.855532  |
| H  | -1.462621 | -3.413541 | 2.157350  |
| H  | -1.544219 | -4.679202 | 0.886716  |
| H  | -0.791853 | -3.093536 | 0.516421  |
| H  | -6.291785 | -0.892833 | -0.529553 |
| H  | -5.093147 | 0.185384  | 0.256437  |
| H  | -4.856706 | -0.331403 | -1.451390 |
| N  | 1.062919  | -0.050619 | -1.473252 |
| C  | -0.907994 | 2.523897  | -0.997871 |
| C  | 0.281086  | 0.193324  | -2.674319 |
| S  | 1.846123  | -1.615284 | -1.339979 |
| H  | 0.661328  | -0.450235 | -3.480209 |
| H  | -0.793373 | -0.039325 | -2.512081 |
| H  | 0.377436  | 1.246948  | -2.982921 |
| O  | 1.226545  | -2.313953 | -0.221367 |
| O  | 1.748013  | -2.163316 | -2.684488 |

|   |           |           |           |
|---|-----------|-----------|-----------|
| C | 3.538565  | -1.268377 | -0.990598 |
| C | 0.038805  | 3.423371  | -1.510223 |
| C | -0.349605 | 4.480423  | -2.328918 |
| C | -1.697778 | 4.668971  | -2.632446 |
| C | -2.650266 | 3.795077  | -2.112823 |
| C | -2.257713 | 2.729395  | -1.303212 |
| H | 1.101251  | 3.281204  | -1.267046 |
| H | 0.406334  | 5.165390  | -2.728875 |
| H | -2.006340 | 5.500965  | -3.275004 |
| H | -3.711599 | 3.938371  | -2.344482 |
| H | -3.015839 | 2.040121  | -0.905858 |
| C | 4.385712  | -0.982068 | -2.062459 |
| C | 5.727085  | -0.731382 | -1.801364 |
| C | 6.230292  | -0.771148 | -0.493046 |
| C | 5.349612  | -1.063278 | 0.556730  |
| C | 4.003479  | -1.316050 | 0.321500  |
| H | 4.000098  | -0.965469 | -3.087459 |
| H | 6.405295  | -0.503786 | -2.632893 |
| C | 7.683830  | -0.534594 | -0.227026 |
| H | 5.720474  | -1.084413 | 1.589000  |
| H | 3.320186  | -1.517276 | 1.149794  |
| H | 8.140337  | 0.113575  | -0.995656 |
| H | 7.846215  | -0.073216 | 0.763113  |
| H | 8.243510  | -1.490399 | -0.233873 |

# 6a2<sub>syn</sub>

65

scf done: -2059.825098

|    |           |           |           |
|----|-----------|-----------|-----------|
| C  | 0.702530  | 1.884087  | 3.914766  |
| C  | -0.555629 | 2.502983  | 3.547799  |
| C  | -1.144459 | 2.260147  | 2.348935  |
| C  | -0.468874 | 1.381641  | 1.426362  |
| C  | 0.623792  | 0.455889  | 1.894900  |
| C  | 1.306059  | 0.950730  | 3.140997  |
| C  | 2.506996  | 0.259076  | 3.639018  |
| O  | 2.948896  | -0.765918 | 3.183613  |
| N  | 1.394986  | 0.114220  | 0.739776  |
| H  | 1.169109  | 2.167383  | 4.867108  |
| H  | -1.005613 | 3.224613  | 4.238104  |
| H  | -2.040236 | 2.806601  | 2.031564  |
| H  | 0.164830  | -0.507652 | 2.248554  |
| H  | 2.982196  | 0.763399  | 4.523665  |
| C  | 0.804920  | 0.607439  | -0.295664 |
| C  | -0.380145 | 1.476972  | 0.034548  |
| Au | -1.928991 | -0.217323 | 0.267277  |
| C  | -3.108326 | -1.874906 | 0.007457  |
| N  | -2.690789 | -3.142664 | 0.205368  |
| C  | -3.710362 | -4.026109 | -0.073029 |
| C  | -4.783213 | -3.283421 | -0.455541 |
| N  | -4.391727 | -1.962141 | -0.399548 |
| C  | -5.259069 | -0.848772 | -0.733604 |
| C  | -1.359957 | -3.517108 | 0.664907  |
| H  | -3.583661 | -5.104411 | 0.020867  |
| H  | -5.786100 | -3.576090 | -0.765976 |
| H  | -4.684601 | 0.087257  | -0.653779 |
| H  | -5.632173 | -0.957810 | -1.765442 |
| H  | -6.114256 | -0.810421 | -0.038280 |
| H  | -1.280238 | -4.614739 | 0.651791  |
| H  | -0.584203 | -3.090161 | 0.005089  |
| H  | -1.204420 | -3.160232 | 1.697865  |

|   |           |           |           |
|---|-----------|-----------|-----------|
| N | 1.167190  | 0.257369  | -1.576848 |
| C | -0.864453 | 2.654996  | -0.734034 |
| C | 0.508451  | 0.810217  | -2.751279 |
| S | 1.985744  | -1.276870 | -1.755853 |
| H | -0.588776 | 0.662400  | -2.709918 |
| H | 0.895517  | 0.291086  | -3.639939 |
| H | 0.725482  | 1.886550  | -2.852557 |
| C | 3.618706  | -1.014920 | -1.139090 |
| O | 1.281998  | -2.252769 | -0.933999 |
| O | 2.057604  | -1.465750 | -3.197488 |
| C | 0.079616  | 3.651186  | -1.022657 |
| C | -0.297566 | 4.811276  | -1.692255 |
| C | -1.626087 | 4.997311  | -2.074980 |
| C | -2.573233 | 4.019568  | -1.780439 |
| C | -2.194716 | 2.855310  | -1.112973 |
| H | 1.125667  | 3.506872  | -0.720525 |
| H | 0.452428  | 5.578500  | -1.913831 |
| H | -1.923635 | 5.909257  | -2.604024 |
| H | -3.618845 | 4.159673  | -2.075630 |
| H | -2.948768 | 2.087610  | -0.892596 |
| C | 3.946591  | -1.385868 | 0.163312  |
| C | 5.250623  | -1.186559 | 0.601010  |
| C | 6.224136  | -0.629304 | -0.238422 |
| C | 5.858801  | -0.266827 | -1.542682 |
| C | 4.562439  | -0.458893 | -2.004349 |
| H | 3.187338  | -1.794421 | 0.834658  |
| H | 5.513275  | -1.462173 | 1.629752  |
| C | 7.631822  | -0.450353 | 0.237087  |
| H | 6.610708  | 0.170183  | -2.211259 |
| H | 4.286102  | -0.190001 | -3.029486 |
| H | 8.130255  | 0.394759  | -0.269757 |
| H | 7.674733  | -0.280618 | 1.327433  |
| H | 8.234302  | -1.355652 | 0.026480  |

# **TS6a2anti**

65

scf done: -2059.806154

|    |           |           |           |
|----|-----------|-----------|-----------|
| C  | 4.330764  | 0.071639  | 2.598406  |
| C  | 4.724160  | 0.080801  | 1.225734  |
| C  | 3.872594  | -0.342324 | 0.243465  |
| C  | 2.573699  | -0.833359 | 0.616710  |
| C  | 2.195412  | -0.911900 | 2.030164  |
| C  | 3.111012  | -0.392951 | 3.025755  |
| C  | 2.785804  | -0.344453 | 4.469849  |
| O  | 1.773321  | -0.749305 | 4.972738  |
| N  | 0.901837  | -1.308789 | 2.170073  |
| H  | 5.033680  | 0.449874  | 3.351765  |
| H  | 5.722218  | 0.444975  | 0.962106  |
| H  | 4.150160  | -0.304109 | -0.815649 |
| H  | 2.874463  | -1.864589 | 1.421603  |
| H  | 3.604814  | 0.121112  | 5.084125  |
| C  | 0.433045  | -1.502403 | 0.943515  |
| C  | 1.374138  | -1.182289 | -0.136099 |
| Au | 0.715099  | 0.943303  | -0.493745 |
| C  | 0.142587  | 2.884399  | -0.859156 |
| N  | 0.681546  | 4.017984  | -0.357165 |
| C  | 0.017595  | 5.125046  | -0.847993 |
| C  | -0.955361 | 4.662574  | -1.674277 |
| N  | -0.864448 | 3.285014  | -1.666461 |
| C  | -1.723505 | 2.415945  | -2.453043 |



|   |           |           |           |
|---|-----------|-----------|-----------|
| C | 1.783070  | 4.091467  | 0.583170  |
| H | 0.297158  | 6.139756  | -0.564402 |
| H | -1.703079 | 5.187889  | -2.268459 |
| H | -2.779601 | 2.678212  | -2.272700 |
| H | -1.500304 | 2.531105  | -3.527421 |
| H | -1.555455 | 1.366664  | -2.158962 |
| H | 2.578985  | 4.740400  | 0.181220  |
| H | 1.436040  | 4.496837  | 1.548895  |
| H | 2.184697  | 3.077052  | 0.739657  |
| N | -0.818647 | -2.064805 | 0.821617  |
| C | 1.487742  | -1.949540 | -1.415505 |
| C | -1.435320 | -2.664773 | 2.005284  |
| S | -1.878012 | -1.866330 | -0.520284 |
| C | -3.270643 | -1.068342 | 0.222723  |
| O | -1.237384 | -0.929520 | -1.436125 |
| O | -2.268234 | -3.193607 | -0.956572 |
| H | -2.225198 | -3.361497 | 1.680335  |
| H | -0.668296 | -3.230252 | 2.555771  |
| H | -1.859985 | -1.899344 | 2.680123  |
| C | 1.144929  | -3.306400 | -1.457086 |
| C | 1.311042  | -4.046267 | -2.625545 |
| C | 1.837407  | -3.447300 | -3.768294 |
| C | 2.191024  | -2.099507 | -3.736458 |
| C | 2.012049  | -1.357120 | -2.571549 |
| H | 0.730444  | -3.796641 | -0.567775 |
| H | 1.027989  | -5.104669 | -2.639311 |
| H | 1.968192  | -4.030633 | -4.686451 |
| H | 2.599369  | -1.615988 | -4.631098 |
| H | 2.269200  | -0.288398 | -2.564696 |
| C | -3.134471 | 0.241200  | 0.688945  |
| C | -4.236977 | 0.866504  | 1.255062  |
| C | -5.473928 | 0.209497  | 1.352346  |
| C | -5.575373 | -1.102182 | 0.873988  |
| C | -4.481028 | -1.750824 | 0.309485  |
| H | -2.171400 | 0.765241  | 0.620010  |
| H | -4.142208 | 1.890581  | 1.636500  |
| C | -6.661475 | 0.907341  | 1.936080  |
| H | -6.534036 | -1.629246 | 0.948990  |
| H | -4.559090 | -2.777995 | -0.062929 |
| H | -6.370031 | 1.594391  | 2.750142  |
| H | -7.175440 | 1.516023  | 1.166659  |
| H | -7.401535 | 0.190375  | 2.331535  |

### 6a2<sub>anti</sub>

65

scf done: -2059.826684

|   |           |           |           |
|---|-----------|-----------|-----------|
| C | 0.148806  | -4.365717 | -0.555341 |
| C | -0.543413 | -3.923516 | -1.741905 |
| C | -1.255279 | -2.759453 | -1.758829 |
| C | -1.338018 | -2.019433 | -0.530261 |
| C | -1.092484 | -2.732053 | 0.755998  |
| C | -0.022124 | -3.771048 | 0.658693  |
| C | 0.747077  | -4.264394 | 1.812883  |
| O | 0.685269  | -3.833197 | 2.935753  |
| N | -1.187604 | -1.767036 | 1.806275  |
| H | 0.843880  | -5.211555 | -0.638033 |
| H | -0.433456 | -4.507539 | -2.661895 |
| H | -1.687404 | -2.355629 | -2.682527 |
| H | -2.028740 | -3.351698 | 0.853517  |
| H | 1.446984  | -5.104012 | 1.544412  |

|    |           |           |           |
|----|-----------|-----------|-----------|
| C  | -1.652243 | -0.672866 | 1.287025  |
| C  | -1.767991 | -0.722708 | -0.218302 |
| Au | 0.524376  | -0.448755 | -0.580901 |
| C  | 2.549290  | -0.106914 | -0.651543 |
| N  | 3.398035  | -0.391656 | 0.359204  |
| C  | 4.687396  | -0.044930 | 0.012022  |
| C  | 4.631743  | 0.460656  | -1.248434 |
| N  | 3.307777  | 0.414573  | -1.637456 |
| C  | 2.833190  | 0.845268  | -2.938579 |
| C  | 3.001160  | -0.958928 | 1.638070  |
| H  | 5.529342  | -0.194480 | 0.688137  |
| H  | 5.413986  | 0.844104  | -1.903959 |
| H  | 1.733314  | 0.786548  | -2.957313 |
| H  | 3.144161  | 1.887084  | -3.126838 |
| H  | 3.244957  | 0.195818  | -3.729567 |
| H  | 3.905392  | -1.203546 | 2.215982  |
| H  | 2.387842  | -0.237035 | 2.205075  |
| H  | 2.414280  | -1.879018 | 1.482137  |
| N  | -1.990701 | 0.375959  | 2.128509  |
| C  | -2.653457 | 0.049773  | -1.125413 |
| C  | -1.931175 | 0.069943  | 3.561462  |
| S  | -1.949286 | 2.050325  | 1.692806  |
| O  | -2.122304 | 2.750002  | 2.953283  |
| C  | -0.295486 | 2.356037  | 1.122801  |
| O  | -2.857332 | 2.274610  | 0.585240  |
| H  | -2.510497 | -0.848549 | 3.742488  |
| H  | -0.891625 | -0.115288 | 3.891658  |
| H  | -2.370123 | 0.902985  | 4.124615  |
| C  | -4.022200 | 0.081439  | -0.832713 |
| C  | -4.907814 | 0.732419  | -1.682612 |
| C  | -4.437857 | 1.359305  | -2.837074 |
| C  | -3.080285 | 1.318181  | -3.144684 |
| C  | -2.192011 | 0.659284  | -2.295428 |
| H  | -4.389153 | -0.389910 | 0.087581  |
| H  | -5.975411 | 0.758363  | -1.438409 |
| H  | -5.135587 | 1.880834  | -3.501512 |
| H  | -2.707176 | 1.802812  | -4.053728 |
| H  | -1.120053 | 0.633182  | -2.542641 |
| C  | -0.106586 | 2.828471  | -0.174968 |
| C  | 1.170999  | 3.220580  | -0.568259 |
| C  | 2.255730  | 3.144714  | 0.313347  |
| C  | 2.033488  | 2.655276  | 1.610653  |
| C  | 0.764119  | 2.275666  | 2.029215  |
| H  | -0.962613 | 2.907463  | -0.855168 |
| H  | 1.322983  | 3.618729  | -1.579632 |
| C  | 3.615552  | 3.623669  | -0.089763 |
| H  | 2.874741  | 2.601253  | 2.314145  |
| H  | 0.592219  | 1.943620  | 3.060735  |
| H  | 4.414618  | 2.993357  | 0.341581  |
| H  | 3.739344  | 3.646891  | -1.187584 |
| H  | 3.788270  | 4.655167  | 0.274760  |

**TS<sub>6a1syn'</sub>**

**TS<sub>6a1anti'</sub>**

65

scf done: -2059.792787

|   |           |           |          |
|---|-----------|-----------|----------|
| C | -1.659352 | -2.880798 | 2.478303 |
| C | -2.223024 | -2.855034 | 1.177493 |

|    |           |           |           |
|----|-----------|-----------|-----------|
| C  | -1.952426 | -1.827055 | 0.297499  |
| C  | -1.107455 | -0.785823 | 0.729196  |
| C  | -0.645756 | -0.741015 | 2.083891  |
| C  | -0.856046 | -1.866822 | 2.956757  |
| C  | -0.324769 | -1.931608 | 4.332030  |
| O  | 0.267448  | -1.041039 | 4.883441  |
| N  | 0.239558  | 0.386945  | 2.266898  |
| H  | -1.872200 | -3.732548 | 3.136710  |
| H  | -2.871915 | -3.679895 | 0.864589  |
| H  | -2.365536 | -1.831241 | -0.718673 |
| H  | -1.111798 | 0.270125  | 2.604930  |
| H  | -0.534141 | -2.909134 | 4.845888  |
| C  | 0.246829  | 1.049307  | 1.095593  |
| C  | -0.527899 | 0.353780  | 0.075318  |
| Au | 1.520730  | -0.573994 | -0.439988 |
| C  | 3.365282  | -1.266696 | -0.997911 |
| N  | 4.489396  | -0.518664 | -0.973793 |
| C  | 5.566861  | -1.264362 | -1.404002 |
| C  | 5.094172  | -2.503747 | -1.698928 |
| N  | 3.737972  | -2.484183 | -1.442300 |
| C  | 2.863092  | -3.625392 | -1.632406 |
| C  | 4.545466  | 0.877416  | -0.567786 |
| H  | 6.573824  | -0.851107 | -1.458262 |
| H  | 5.600550  | -3.397767 | -2.062292 |
| H  | 1.857348  | -3.366560 | -1.266368 |
| H  | 2.805569  | -3.888623 | -2.702041 |
| H  | 3.244529  | -4.489785 | -1.064013 |
| H  | 4.055764  | 1.007883  | 0.412431  |
| H  | 5.599923  | 1.182367  | -0.486140 |
| H  | 4.039713  | 1.516636  | -1.311664 |
| C  | 1.005147  | 2.304109  | 0.983299  |
| N  | -1.109062 | 0.986039  | -1.049445 |
| C  | -0.837453 | 0.591874  | -2.419313 |
| S  | -2.465021 | 1.956800  | -0.708404 |
| O  | -2.293860 | 2.351902  | 0.685010  |
| O  | -2.543080 | 2.923776  | -1.791244 |
| C  | -3.866340 | 0.876102  | -0.803160 |
| H  | -1.395641 | 1.256269  | -3.099139 |
| H  | 0.238445  | 0.728279  | -2.646912 |
| H  | -1.118999 | -0.460629 | -2.628174 |
| C  | 1.031052  | 3.070080  | -0.193716 |
| C  | 1.807867  | 4.222144  | -0.263283 |
| C  | 2.566769  | 4.628080  | 0.834508  |
| C  | 2.540192  | 3.877702  | 2.010062  |
| C  | 1.765737  | 2.725225  | 2.085814  |
| H  | 0.424885  | 2.780582  | -1.057769 |
| H  | 1.810580  | 4.816245  | -1.183721 |
| H  | 3.174060  | 5.538369  | 0.776261  |
| H  | 3.125954  | 4.196003  | 2.879519  |
| H  | 1.739779  | 2.132399  | 3.005926  |
| C  | -4.403777 | 0.354852  | 0.373213  |
| C  | -5.461899 | -0.543925 | 0.290071  |
| C  | -5.989397 | -0.930645 | -0.948622 |
| C  | -5.433548 | -0.381540 | -2.113645 |
| C  | -4.383135 | 0.526637  | -2.052346 |
| H  | -3.996424 | 0.660051  | 1.343453  |
| H  | -5.895580 | -0.953809 | 1.210673  |
| C  | -7.149288 | -1.872710 | -1.028205 |
| H  | -5.847223 | -0.663211 | -3.089785 |
| H  | -3.980416 | 0.974357  | -2.967781 |
| H  | -7.179292 | -2.558503 | -0.163361 |

|   |           |           |           |
|---|-----------|-----------|-----------|
| H | -8.105722 | -1.314395 | -1.032497 |
| H | -7.123859 | -2.474517 | -1.953752 |

# 6a1

65

scf done: -2059.905476

|    |           |           |           |
|----|-----------|-----------|-----------|
| C  | -1.996630 | 4.440383  | -0.342417 |
| C  | -1.595316 | 3.939845  | -1.587302 |
| C  | -0.904963 | 2.733203  | -1.688535 |
| C  | -0.603325 | 2.028002  | -0.518626 |
| C  | -0.969800 | 2.570085  | 0.721090  |
| C  | -1.693795 | 3.763691  | 0.841448  |
| C  | -2.083900 | 4.268373  | 2.161587  |
| O  | -1.825934 | 3.697399  | 3.200000  |
| N  | -0.489983 | 1.743701  | 1.720229  |
| H  | -2.547759 | 5.387164  | -0.282909 |
| H  | -1.824448 | 4.507297  | -2.495130 |
| H  | -0.583656 | 2.357512  | -2.666557 |
| H  | -2.651240 | 5.234879  | 2.158053  |
| C  | 0.167307  | 0.692027  | 1.198768  |
| C  | 0.077945  | 0.747589  | -0.237574 |
| Au | -1.712901 | -0.609115 | -0.302578 |
| C  | -3.372187 | -1.814030 | -0.444872 |
| N  | -3.562239 | -2.992102 | 0.187600  |
| C  | -4.787954 | -3.527654 | -0.152095 |
| C  | -5.370815 | -2.654940 | -1.014592 |
| N  | -4.484769 | -1.609170 | -1.181278 |
| C  | -4.740412 | -0.462070 | -2.032547 |
| C  | -2.595936 | -3.623921 | 1.068284  |
| H  | -5.138072 | -4.476112 | 0.254983  |
| H  | -6.337793 | -2.679120 | -1.516969 |
| H  | -5.682702 | 0.026020  | -1.733179 |
| H  | -3.911079 | 0.255019  | -1.923044 |
| H  | -4.812233 | -0.778070 | -3.086926 |
| H  | -2.150834 | -2.867595 | 1.735559  |
| H  | -3.108711 | -4.384195 | 1.677645  |
| H  | -1.795012 | -4.108843 | 0.483255  |
| C  | 0.935348  | -0.237922 | 2.018791  |
| N  | 1.165457  | 0.246477  | -1.011757 |
| H  | -0.686722 | 1.928247  | 2.706670  |
| C  | 0.933541  | -0.472689 | -2.252853 |
| S  | 2.492863  | 1.335705  | -1.056214 |
| H  | 1.903233  | -0.754919 | -2.700429 |
| H  | 0.386480  | -1.408945 | -2.037327 |
| H  | 0.366876  | 0.114535  | -3.003429 |
| O  | 2.495300  | 2.028899  | -2.340709 |
| O  | 2.401299  | 2.082393  | 0.195090  |
| C  | 3.889704  | 0.252596  | -0.989235 |
| C  | 1.108629  | -1.578155 | 1.637995  |
| C  | 1.885266  | -2.431566 | 2.412733  |
| C  | 2.504079  | -1.958077 | 3.571405  |
| C  | 2.344140  | -0.626355 | 3.952662  |
| C  | 1.564391  | 0.231195  | 3.182117  |
| H  | 0.615757  | -1.954506 | 0.732425  |
| H  | 2.009241  | -3.477674 | 2.112195  |
| H  | 3.115616  | -2.632661 | 4.180806  |
| H  | 2.837839  | -0.247741 | 4.853900  |
| H  | 1.477862  | 1.287178  | 3.463386  |
| C  | 4.662822  | 0.048939  | -2.129493 |
| C  | 5.762352  | -0.801080 | -2.049877 |

|   |          |           |           |
|---|----------|-----------|-----------|
| C | 6.099094 | -1.439332 | -0.850084 |
| C | 5.301649 | -1.207180 | 0.281510  |
| C | 4.202440 | -0.361380 | 0.224458  |
| H | 4.404563 | 0.559239  | -3.063889 |
| H | 6.378667 | -0.970789 | -2.941191 |
| C | 7.302695 | -2.324483 | -0.763223 |
| H | 5.556033 | -1.698207 | 1.229413  |
| H | 3.590374 | -0.171506 | 1.114778  |
| H | 7.150586 | -3.149210 | -0.044415 |
| H | 7.562696 | -2.758391 | -1.744493 |
| H | 8.185022 | -1.752215 | -0.415853 |

# TS<sub>6a2syn'</sub>

65

scf done: -2059.792272

|    |           |           |           |
|----|-----------|-----------|-----------|
| C  | 0.515987  | 1.346833  | 4.273481  |
| C  | -0.642881 | 2.087540  | 3.928916  |
| C  | -1.081006 | 2.175433  | 2.623634  |
| C  | -0.362656 | 1.494872  | 1.619134  |
| C  | 0.782981  | 0.694647  | 1.966772  |
| C  | 1.257721  | 0.670775  | 3.329660  |
| C  | 2.403203  | -0.158851 | 3.740307  |
| O  | 2.916641  | -1.002516 | 3.047441  |
| N  | 1.504399  | 0.362171  | 0.770503  |
| H  | 0.831441  | 1.299036  | 5.323162  |
| H  | -1.186175 | 2.618073  | 4.717891  |
| H  | -1.944250 | 2.796793  | 2.358570  |
| H  | 0.765555  | -0.481747 | 1.607418  |
| H  | 2.756028  | 0.035818  | 4.787699  |
| C  | 0.756068  | 0.808376  | -0.246749 |
| C  | -0.418833 | 1.564719  | 0.182218  |
| Au | -1.801758 | -0.275568 | 0.076346  |
| C  | -2.921728 | -1.979939 | -0.091228 |
| N  | -2.526926 | -3.192752 | 0.348509  |
| C  | -3.488728 | -4.139055 | 0.063143  |
| C  | -4.501807 | -3.491483 | -0.569605 |
| N  | -4.133322 | -2.163280 | -0.654923 |
| C  | -4.947666 | -1.139862 | -1.281654 |
| C  | -1.263905 | -3.454209 | 1.022083  |
| H  | -3.366103 | -5.187939 | 0.332432  |
| H  | -5.448527 | -3.854699 | -0.969338 |
| H  | -5.922800 | -1.065415 | -0.771672 |
| H  | -4.425448 | -0.173074 | -1.210032 |
| H  | -5.109929 | -1.384038 | -2.344898 |
| H  | -0.420702 | -3.129345 | 0.388359  |
| H  | -1.231555 | -2.917521 | 1.986391  |
| H  | -1.182206 | -4.535243 | 1.212256  |
| N  | 1.107962  | 0.454598  | -1.529618 |
| C  | -1.040884 | 2.737393  | -0.503055 |
| C  | 0.307590  | 0.902796  | -2.656356 |
| S  | 1.893429  | -1.106820 | -1.708741 |
| C  | 3.560396  | -0.833753 | -1.207593 |
| O  | 1.235079  | -2.039986 | -0.799706 |
| O  | 1.862444  | -1.345863 | -3.142794 |
| H  | 0.721799  | 0.471439  | -3.578613 |
| H  | -0.752202 | 0.580144  | -2.555498 |
| H  | 0.340856  | 2.001464  | -2.732246 |
| C  | 4.416778  | -0.190063 | -2.102735 |
| C  | 5.738849  | 0.011125  | -1.729463 |
| C  | 6.216032  | -0.428699 | -0.485258 |

|   |           |           |           |
|---|-----------|-----------|-----------|
| C | 5.327865  | -1.073446 | 0.384752  |
| C | 3.998966  | -1.283307 | 0.034706  |
| H | 4.051441  | 0.143619  | -3.080204 |
| H | 6.424004  | 0.518270  | -2.419849 |
| C | 7.651443  | -0.233113 | -0.110691 |
| H | 5.678558  | -1.412191 | 1.367423  |
| H | 3.308660  | -1.764188 | 0.732308  |
| H | 8.054356  | 0.709978  | -0.520850 |
| H | 7.790255  | -0.226921 | 0.984485  |
| H | 8.276695  | -1.053368 | -0.514406 |
| C | -0.198742 | 3.757501  | -0.968518 |
| C | -0.726946 | 4.906253  | -1.551382 |
| C | -2.108111 | 5.062805  | -1.663042 |
| C | -2.955742 | 4.065538  | -1.185768 |
| C | -2.425669 | 2.911680  | -0.610436 |
| H | 0.889042  | 3.644950  | -0.868508 |
| H | -0.052606 | 5.689794  | -1.914400 |
| H | -2.524548 | 5.967410  | -2.119582 |
| H | -4.042225 | 4.183044  | -1.263851 |
| H | -3.104971 | 2.131569  | -0.238416 |

# **TS<sub>6a2anti'</sub>**

65

scf done: -2059.796773

|    |           |           |           |
|----|-----------|-----------|-----------|
| C  | 0.856671  | 0.118633  | 4.322498  |
| C  | 2.186161  | 0.379463  | 3.911284  |
| C  | 2.615333  | 0.072216  | 2.635395  |
| C  | 1.706401  | -0.545195 | 1.752915  |
| C  | 0.421256  | -0.967648 | 2.226760  |
| C  | -0.058470 | -0.517148 | 3.505391  |
| C  | -1.433738 | -0.741740 | 3.983210  |
| O  | -2.299003 | -1.320882 | 3.375505  |
| N  | -0.330952 | -1.545896 | 1.138845  |
| H  | 0.534792  | 0.427376  | 5.325028  |
| H  | 2.875166  | 0.858806  | 4.614357  |
| H  | 3.626998  | 0.327248  | 2.298310  |
| H  | 0.338752  | -2.195326 | 2.167378  |
| H  | -1.626562 | -0.306747 | 5.001147  |
| C  | 0.503184  | -1.538821 | 0.084203  |
| C  | 1.764953  | -0.864671 | 0.348772  |
| Au | 0.770216  | 1.145978  | -0.167070 |
| C  | -0.206715 | 2.906774  | -0.533724 |
| N  | -1.499314 | 3.127082  | -0.212905 |
| C  | -1.870077 | 4.404717  | -0.579723 |
| C  | -0.775520 | 4.985923  | -1.137014 |
| N  | 0.236617  | 4.047112  | -1.099589 |
| C  | 1.577766  | 4.280122  | -1.600574 |
| C  | -2.381719 | 2.130104  | 0.372325  |
| H  | -2.875929 | 4.788445  | -0.409931 |
| H  | -0.623010 | 5.982110  | -1.552056 |
| H  | 1.547654  | 4.497091  | -2.681528 |
| H  | 2.037769  | 5.130723  | -1.070300 |
| H  | 2.181700  | 3.374819  | -1.430659 |
| H  | -2.667772 | 1.376244  | -0.383468 |
| H  | -1.875696 | 1.621531  | 1.211763  |
| H  | -3.289356 | 2.628647  | 0.748892  |
| N  | 0.117459  | -2.112279 | -1.101518 |
| C  | 3.057348  | -1.075171 | -0.358775 |
| C  | 0.689587  | -1.664316 | -2.360578 |

|   |           |           |           |
|---|-----------|-----------|-----------|
| S | -1.326122 | -3.097462 | -1.141276 |
| H | 0.085374  | -2.069435 | -3.185670 |
| H | 1.725024  | -2.023179 | -2.489679 |
| H | 0.685765  | -0.553809 | -2.408125 |
| C | -2.668123 | -1.967524 | -0.899351 |
| O | -1.372285 | -3.573511 | -2.513756 |
| O | -1.229884 | -4.018825 | -0.027719 |
| C | -3.254486 | -1.841261 | 0.358695  |
| C | -4.340414 | -0.984043 | 0.503421  |
| C | -4.847897 | -0.260850 | -0.583840 |
| C | -4.230431 | -0.406121 | -1.835079 |
| C | -3.146100 | -1.259883 | -2.004881 |
| H | -2.858611 | -2.389249 | 1.217774  |
| H | -4.805914 | -0.877363 | 1.491258  |
| C | -6.035917 | 0.634372  | -0.417806 |
| H | -4.620458 | 0.149774  | -2.696895 |
| H | -2.690468 | -1.395141 | -2.992330 |
| H | -6.976304 | 0.073909  | -0.585641 |
| H | -6.090878 | 1.053181  | 0.603044  |
| H | -6.025839 | 1.468131  | -1.142522 |
| C | 3.921023  | -0.013311 | -0.653958 |
| C | 5.158590  | -0.250382 | -1.250081 |
| C | 5.548612  | -1.552434 | -1.556403 |
| C | 4.699545  | -2.618080 | -1.258102 |
| C | 3.465346  | -2.381941 | -0.658829 |
| H | 3.622477  | 1.018248  | -0.417152 |
| H | 5.821914  | 0.590921  | -1.479236 |
| H | 6.519677  | -1.738804 | -2.028060 |
| H | 5.002550  | -3.645044 | -1.489988 |
| H | 2.801745  | -3.223066 | -0.419755 |

## 6a2

65

scf done: -2059.898715

|    |           |           |           |
|----|-----------|-----------|-----------|
| C  | 0.256702  | -3.595801 | 2.910415  |
| C  | 1.039189  | -2.622748 | 3.547552  |
| C  | 1.077554  | -1.313088 | 3.079530  |
| C  | 0.306781  | -0.958791 | 1.960309  |
| C  | -0.475081 | -1.953269 | 1.337653  |
| C  | -0.505553 | -3.284675 | 1.784504  |
| C  | -1.317306 | -4.282216 | 1.083547  |
| O  | -1.980198 | -4.035707 | 0.097404  |
| N  | -1.118747 | -1.393360 | 0.264596  |
| H  | 0.238485  | -4.623806 | 3.293411  |
| H  | 1.633923  | -2.898522 | 4.424377  |
| H  | 1.713860  | -0.571223 | 3.575105  |
| H  | -1.712436 | -1.941502 | -0.361731 |
| H  | -1.289424 | -5.315078 | 1.517785  |
| C  | -0.772651 | -0.076960 | 0.147775  |
| C  | 0.151705  | 0.269718  | 1.174995  |
| Au | 1.907657  | -0.120371 | -0.253238 |
| C  | 3.613534  | -0.298740 | -1.368536 |
| N  | 4.197943  | -1.413307 | -1.856215 |
| C  | 5.338364  | -1.085634 | -2.562810 |
| C  | 5.458736  | 0.266155  | -2.508054 |
| N  | 4.391186  | 0.731088  | -1.767373 |
| C  | 4.117544  | 2.132669  | -1.499220 |
| C  | 3.729544  | -2.774088 | -1.673270 |
| H  | 5.963277  | -1.844808 | -3.032827 |
| H  | 6.210307  | 0.936775  | -2.924623 |

|   |           |           |           |
|---|-----------|-----------|-----------|
| H | 5.054163  | 2.704493  | -1.588176 |
| H | 3.379458  | 2.528755  | -2.218475 |
| H | 3.723526  | 2.245213  | -0.475986 |
| H | 3.497300  | -3.229834 | -2.650401 |
| H | 4.503246  | -3.374365 | -1.166253 |
| H | 2.819551  | -2.758946 | -1.053264 |
| N | -1.354485 | 0.743979  | -0.800266 |
| C | 0.437201  | 1.652457  | 1.643726  |
| C | -1.390722 | 0.313062  | -2.190568 |
| S | -2.630502 | 1.794589  | -0.284664 |
| H | -1.652369 | 1.177028  | -2.824715 |
| H | -0.381003 | -0.029589 | -2.482020 |
| H | -2.121426 | -0.501407 | -2.378940 |
| O | -2.499990 | 1.872216  | 1.159948  |
| O | -2.541699 | 2.960990  | -1.144596 |
| C | -4.093778 | 0.887384  | -0.688559 |
| C | 0.676123  | 2.704401  | 0.743946  |
| C | 0.897708  | 3.997272  | 1.206176  |
| C | 0.891428  | 4.266733  | 2.574974  |
| C | 0.648116  | 3.233125  | 3.475339  |
| C | 0.419131  | 1.938315  | 3.013984  |
| H | 0.660715  | 2.517129  | -0.337932 |
| H | 1.070983  | 4.806194  | 0.487556  |
| H | 1.065457  | 5.285817  | 2.937595  |
| H | 0.620811  | 3.435359  | 4.551915  |
| H | 0.183708  | 1.145812  | 3.732996  |
| C | -4.786686 | 1.176056  | -1.863019 |
| C | -5.915102 | 0.425286  | -2.176323 |
| C | -6.357655 | -0.605079 | -1.337009 |
| C | -5.638714 | -0.868935 | -0.161452 |
| C | -4.513574 | -0.127359 | 0.175174  |
| H | -4.448494 | 1.988430  | -2.515476 |
| H | -6.471288 | 0.646019  | -3.095478 |
| C | -7.589700 | -1.387054 | -1.666633 |
| H | -5.978907 | -1.668749 | 0.507597  |
| H | -3.971530 | -0.321203 | 1.108010  |
| H | -7.513657 | -2.432113 | -1.317867 |
| H | -8.476517 | -0.944944 | -1.171973 |
| H | -7.791781 | -1.392996 | -2.751870 |

## Cartesian coordinates of B-Series



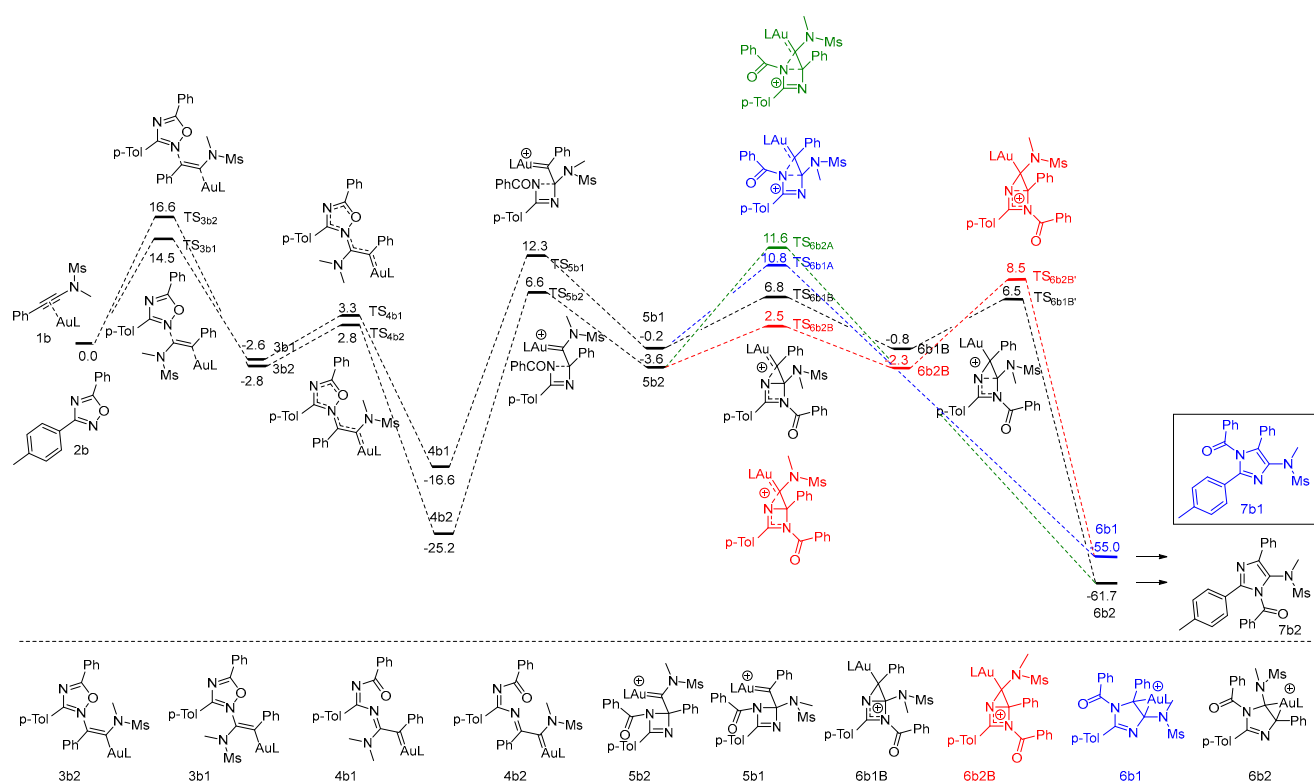

Figure S2. B-series reaction mechanism

```

scf done: -1429.958460
C      -1.695926      2.089645      -0.034247
N      -2.571859      2.227485      -1.054851
C      -3.215743      3.445743      -0.978289
C      -2.729658      4.075845      0.122128
N      -1.798637      3.227403      0.686854
C      -2.776430      1.259880      -2.117049
C      -1.070505      3.529812      1.904710
Au     -0.482158      0.456421      0.324310
C      0.661462      -1.320253      0.714498
C      1.690644      -1.128030      -0.014310
C      0.196963      -2.413218      1.560578
N      2.626030      -0.902472      -0.866610
S      2.385913      -1.544326      -2.530487
C      3.901925      -0.231976      -0.584999
O      3.725603      -1.713102      -3.051913
O      1.443734      -2.632251      -2.383502
C      1.593906      -0.164449      -3.313478
C      -0.848992      -2.230134      2.476485
C      -1.273350      -3.285313      3.278378
C      -0.668500      -4.536163      3.162795
C      0.364474      -4.733008      2.243689
C      0.798175      -3.679267      1.449760
H      -3.963846      3.752060      -1.709481
H      -2.967018      5.046052      0.558617
H      -2.637871      0.241773      -1.719832
H      -3.804130      1.356445      -2.501257
H      -2.065507      1.431090      -2.944681
H      -1.766934      3.606367      2.756698
H      -0.349878      2.720420      2.098835
H      -0.526651      4.482484      1.792671
H      4.022303      0.644103      -1.245629
H      3.889381      0.098642      0.464549
H      4.736247      -0.931415      -0.751619
H      1.385428      -0.483838      -4.349344
H      0.655098      0.056643      -2.776731
H      2.287221      0.692353      -3.310013
H      -1.326068      -1.245615      2.560599
H      -2.086396      -3.131917      3.996202
H      -1.007262      -5.367890      3.790501
H      0.834296      -5.717712      2.146122
H      1.599691      -3.830390      0.715941

```

## 2b

30

```

scf done: -762.401587
C      -1.741037      -0.992482      -0.345467
C      -2.581278      -0.523615      0.669265
C      -3.931252      -0.858725      0.670783
C      -4.478269      -1.663643      -0.334904
C      -3.625138      -2.131473      -1.344348
C      -2.276138      -1.802925      -1.355174
C      -5.938732      -1.996757      -0.349223
C      -0.321485      -0.639306      -0.340956
N      0.254723      0.144886      0.622389
N      0.517127      -1.047393      -1.265931
O      1.718104      -0.494282      -0.881536
C      1.495347      0.197400      0.240041
C      2.608341      0.893156      0.870596

```

|   |           |           |           |
|---|-----------|-----------|-----------|
| C | 2.374461  | 1.618986  | 2.045915  |
| C | 3.421687  | 2.291209  | 2.665369  |
| C | 4.704185  | 2.242849  | 2.116885  |
| C | 4.939462  | 1.520724  | 0.946566  |
| C | 3.896244  | 0.845585  | 0.321225  |
| H | -2.159682 | 0.105651  | 1.460616  |
| H | -4.580688 | -0.488974 | 1.474667  |
| H | -4.033780 | -2.770927 | -2.137372 |
| H | -1.618951 | -2.176111 | -2.148666 |
| H | -6.123340 | -2.999940 | -0.774159 |
| H | -6.374147 | -1.965133 | 0.665517  |
| H | -6.506504 | -1.274887 | -0.969035 |
| H | 1.360962  | 1.644757  | 2.460740  |
| H | 3.238003  | 2.858613  | 3.584415  |
| H | 5.528757  | 2.773381  | 2.606590  |
| H | 5.946584  | 1.483432  | 0.516863  |
| H | 4.074042  | 0.276834  | -0.597727 |

### TS<sub>3b1</sub>

71

scf done: -2192.366303

|    |           |           |           |
|----|-----------|-----------|-----------|
| N  | -4.135733 | -0.246246 | -0.206984 |
| C  | -3.211993 | 0.514571  | 0.429736  |
| C  | -3.545145 | -1.405401 | -0.307495 |
| O  | -2.321361 | -1.410525 | 0.227902  |
| N  | -2.103247 | -0.146788 | 0.711324  |
| C  | -3.379353 | 1.923156  | 0.760800  |
| C  | -2.784236 | 2.466346  | 1.906426  |
| C  | -2.939118 | 3.815973  | 2.196970  |
| C  | -3.676789 | 4.655940  | 1.350974  |
| C  | -4.260467 | 4.099879  | 0.204086  |
| C  | -4.129037 | 2.748052  | -0.086076 |
| C  | -3.867059 | 6.103863  | 1.679462  |
| C  | -4.054885 | -2.635600 | -0.883342 |
| C  | -3.301171 | -3.817218 | -0.836501 |
| C  | -3.815593 | -4.981632 | -1.394524 |
| C  | -5.074641 | -4.971275 | -1.997112 |
| C  | -5.826015 | -3.795836 | -2.041897 |
| C  | -5.320577 | -2.627267 | -1.485252 |
| C  | -0.190270 | 0.459267  | 0.284082  |
| C  | 0.623590  | -0.443908 | 0.754562  |
| C  | 0.348378  | -1.572625 | 1.645529  |
| C  | -0.371277 | -1.396249 | 2.836887  |
| C  | -0.639360 | -2.482840 | 3.664043  |
| C  | -0.207463 | -3.760468 | 3.308630  |
| C  | 0.515762  | -3.944740 | 2.129921  |
| C  | 0.808644  | -2.856299 | 1.313447  |
| Au | 2.627426  | -0.135967 | 0.131830  |
| N  | -0.345072 | 1.625462  | -0.310603 |
| C  | 0.052883  | 2.905651  | 0.282949  |
| S  | -0.892158 | 1.657428  | -1.971334 |
| O  | -1.745676 | 0.497670  | -2.151649 |
| O  | -1.362337 | 3.010716  | -2.195033 |
| C  | 0.620045  | 1.397489  | -2.861107 |
| C  | 4.627170  | 0.053710  | -0.381814 |
| N  | 5.586965  | -0.886403 | -0.229303 |
| C  | 6.806311  | -0.414177 | -0.673169 |
| C  | 6.597021  | 0.852580  | -1.113657 |
| N  | 5.255631  | 1.121329  | -0.924337 |

|   |           |           |           |
|---|-----------|-----------|-----------|
| C | 5.396605  | -2.207920 | 0.338417  |
| C | 4.615030  | 2.362141  | -1.312923 |
| H | -2.209872 | 1.815787  | 2.578878  |
| H | -2.482339 | 4.233840  | 3.102985  |
| H | -4.831921 | 4.746405  | -0.473108 |
| H | -4.584499 | 2.319578  | -0.986093 |
| H | -3.931170 | 6.722585  | 0.766748  |
| H | -4.809225 | 6.259565  | 2.240686  |
| H | -3.047009 | 6.492423  | 2.308725  |
| H | -2.316405 | -3.817362 | -0.355557 |
| H | -3.232239 | -5.908001 | -1.358411 |
| H | -5.476263 | -5.891758 | -2.435562 |
| H | -6.814085 | -3.792668 | -2.514376 |
| H | -5.894056 | -1.694387 | -1.508461 |
| H | -0.718902 | -0.393753 | 3.112101  |
| H | -1.196948 | -2.331519 | 4.595228  |
| H | -0.427507 | -4.615231 | 3.958013  |
| H | 0.863731  | -4.945422 | 1.849384  |
| H | 1.384883  | -2.997432 | 0.389541  |
| H | 0.926013  | 3.323512  | -0.255177 |
| H | -0.782014 | 3.625303  | 0.246299  |
| H | 0.333660  | 2.715745  | 1.331185  |
| H | 1.320670  | 2.213882  | -2.619284 |
| H | 1.027488  | 0.410747  | -2.582702 |
| H | 0.354931  | 1.421677  | -3.932017 |
| H | 7.711913  | -1.019072 | -0.627924 |
| H | 7.279901  | 1.587799  | -1.538983 |
| H | 5.987761  | -2.314948 | 1.263651  |
| H | 4.329352  | -2.344809 | 0.575545  |
| H | 5.710083  | -2.978878 | -0.385335 |
| H | 5.314693  | 3.199373  | -1.158352 |
| H | 4.318660  | 2.333455  | -2.376620 |
| H | 3.721817  | 2.520756  | -0.686977 |

### 3b1

71

scf done: -2192.390039

|   |           |           |           |
|---|-----------|-----------|-----------|
| N | -4.023197 | 0.043656  | -0.076177 |
| C | -2.962563 | 0.805235  | 0.241875  |
| C | -3.528541 | -1.143630 | -0.315332 |
| O | -2.201601 | -1.190339 | -0.185563 |
| N | -1.834793 | 0.076962  | 0.188914  |
| C | -3.051299 | 2.200606  | 0.608799  |
| C | -2.059585 | 2.843812  | 1.365017  |
| C | -2.208042 | 4.177433  | 1.712510  |
| C | -3.335987 | 4.908908  | 1.310547  |
| C | -4.327389 | 4.251869  | 0.567799  |
| C | -4.198328 | 2.914773  | 0.226337  |
| C | -3.472155 | 6.357591  | 1.651488  |
| C | -4.232233 | -2.358431 | -0.652753 |
| C | -3.552941 | -3.583431 | -0.745037 |
| C | -4.261680 | -4.732771 | -1.069173 |
| C | -5.637133 | -4.663322 | -1.301423 |
| C | -6.312904 | -3.445402 | -1.206819 |
| C | -5.615311 | -2.290419 | -0.879799 |
| C | -0.426674 | 0.380379  | 0.039891  |
| C | 0.509092  | -0.398707 | 0.624357  |
| C | 0.098401  | -1.429172 | 1.597922  |
| C | -0.681320 | -1.113833 | 2.722197  |
| C | -1.079827 | -2.105225 | 3.615913  |

|    |           |           |           |
|----|-----------|-----------|-----------|
| C  | -0.719226 | -3.434221 | 3.398292  |
| C  | 0.063967  | -3.760560 | 2.290520  |
| C  | 0.482329  | -2.766962 | 1.409983  |
| Au | 2.551535  | -0.252540 | 0.211154  |
| N  | -0.223951 | 1.506068  | -0.782697 |
| C  | 0.727789  | 2.555548  | -0.442769 |
| S  | -0.629723 | 1.370717  | -2.424329 |
| O  | -1.830914 | 0.546159  | -2.492057 |
| O  | -0.607817 | 2.717615  | -2.966965 |
| C  | 0.701838  | 0.440615  | -3.147633 |
| C  | 4.607402  | -0.181823 | -0.152518 |
| N  | 5.426131  | -1.215176 | -0.456478 |
| C  | 6.725607  | -0.778351 | -0.625900 |
| C  | 6.714517  | 0.563488  | -0.421461 |
| N  | 5.409076  | 0.908296  | -0.130872 |
| C  | 5.022604  | -2.601658 | -0.584492 |
| C  | 4.960687  | 2.264567  | 0.116207  |
| H  | -1.182517 | 2.286958  | 1.713995  |
| H  | -1.437170 | 4.668606  | 2.318571  |
| H  | -5.220895 | 4.806547  | 0.257381  |
| H  | -4.978839 | 2.406230  | -0.348677 |
| H  | -3.064925 | 6.988520  | 0.837018  |
| H  | -4.529723 | 6.646258  | 1.783579  |
| H  | -2.918667 | 6.615660  | 2.571140  |
| H  | -2.475241 | -3.629560 | -0.551858 |
| H  | -3.740905 | -5.693300 | -1.140215 |
| H  | -6.190884 | -5.573355 | -1.557702 |
| H  | -7.391525 | -3.399317 | -1.388919 |
| H  | -6.125332 | -1.324736 | -0.799070 |
| H  | -0.967793 | -0.070136 | 2.906925  |
| H  | -1.679318 | -1.835236 | 4.492989  |
| H  | -1.036871 | -4.214231 | 4.099231  |
| H  | 0.362351  | -4.801052 | 2.117021  |
| H  | 1.111550  | -3.025713 | 0.547570  |
| H  | 1.698208  | 2.434887  | -0.966780 |
| H  | 0.305779  | 3.543867  | -0.693759 |
| H  | 0.924096  | 2.505113  | 0.641010  |
| H  | 1.637501  | 1.015727  | -3.050960 |
| H  | 0.774271  | -0.533800 | -2.635974 |
| H  | 0.441742  | 0.306010  | -4.211324 |
| H  | 7.539664  | -1.461879 | -0.867528 |
| H  | 7.516954  | 1.300769  | -0.449312 |
| H  | 3.952249  | -2.684242 | -0.336535 |
| H  | 5.184947  | -2.954451 | -1.617306 |
| H  | 5.603690  | -3.231437 | 0.110020  |
| H  | 5.750642  | 2.822180  | 0.644674  |
| H  | 4.727603  | 2.779948  | -0.832542 |
| H  | 4.056886  | 2.236792  | 0.745988  |

# TS<sub>3b2</sub>

71

scf done: -2192.358629

|    |           |           |           |
|----|-----------|-----------|-----------|
| O  | -3.136837 | -0.089512 | -1.242204 |
| N  | -2.198136 | 0.831918  | -0.835145 |
| C  | -2.778357 | 1.470899  | 0.179112  |
| N  | -4.020874 | 0.995976  | 0.451148  |
| C  | -4.184577 | 0.041532  | -0.423639 |
| C  | -0.450520 | -0.180439 | -0.474017 |
| C  | 0.562616  | 0.376584  | -1.059035 |
| Au | 2.186008  | -0.712491 | -0.167611 |

|   |           |           |           |
|---|-----------|-----------|-----------|
| C | 3.767669  | -1.728527 | 0.670639  |
| H | 4.782641  | 0.563017  | -0.085150 |
| C | 5.603256  | -0.153119 | 0.087952  |
| H | 6.097138  | -0.387898 | -0.871456 |
| H | 6.339188  | 0.303843  | 0.769428  |
| N | 5.066290  | -1.359390 | 0.690659  |
| C | 5.827785  | -2.307325 | 1.346280  |
| H | 6.903864  | -2.195268 | 1.478639  |
| C | 4.974492  | -3.286434 | 1.744482  |
| H | 5.149494  | -4.208905 | 2.298024  |
| N | 3.714853  | -2.911120 | 1.321349  |
| C | 2.499684  | -3.679419 | 1.524140  |
| H | 2.693519  | -4.467891 | 2.267958  |
| H | 2.172407  | -4.144722 | 0.578169  |
| H | 1.697746  | -3.019703 | 1.896886  |
| N | 0.707936  | 1.394108  | -1.965295 |
| C | -0.316020 | 1.761102  | -2.946571 |
| H | -0.961325 | 2.587241  | -2.600406 |
| H | 0.170858  | 2.068348  | -3.888276 |
| H | -0.938723 | 0.874180  | -3.142263 |
| S | 2.114439  | 2.359526  | -1.930150 |
| O | 1.697977  | 3.667513  | -2.405803 |
| O | 2.726424  | 2.206242  | -0.616204 |
| C | 3.179393  | 1.615020  | -3.140227 |
| H | 4.097191  | 2.226240  | -3.172662 |
| H | 2.674567  | 1.634993  | -4.119992 |
| H | 3.406739  | 0.582141  | -2.825026 |
| C | -5.315202 | -0.851216 | -0.585101 |
| C | -2.143580 | 2.538621  | 0.936645  |
| C | -1.013220 | -1.305279 | 0.235581  |
| C | -1.417999 | -1.169116 | 1.574862  |
| C | -1.999990 | -2.242482 | 2.241316  |
| C | -2.190408 | -3.455409 | 1.576887  |
| C | -1.790940 | -3.601383 | 0.246795  |
| C | -1.206505 | -2.532348 | -0.422968 |
| H | -1.268867 | -0.208733 | 2.084288  |
| H | -2.311898 | -2.132798 | 3.285507  |
| H | -2.656754 | -4.296792 | 2.101668  |
| H | -1.942297 | -4.555110 | -0.270675 |
| H | -0.894130 | -2.627940 | -1.469928 |
| C | -2.779490 | 3.024473  | 2.088404  |
| C | -2.191949 | 4.035547  | 2.837327  |
| C | -0.963268 | 4.595232  | 2.462157  |
| C | -0.335010 | 4.103022  | 1.309125  |
| C | -0.912127 | 3.093350  | 0.553694  |
| H | -3.741300 | 2.594705  | 2.387800  |
| H | -2.696517 | 4.405005  | 3.738568  |
| C | -0.350298 | 5.708758  | 3.250612  |
| H | 0.628757  | 4.521528  | 0.993298  |
| H | -0.395792 | 2.744830  | -0.345460 |
| H | 0.753055  | 5.661110  | 3.231234  |
| H | -0.637063 | 6.692009  | 2.828499  |
| H | -0.684631 | 5.696973  | 4.302881  |
| C | -5.284276 | -1.886944 | -1.530499 |
| C | -6.373735 | -2.741409 | -1.649317 |
| C | -7.490618 | -2.567285 | -0.830236 |
| C | -7.522504 | -1.537017 | 0.111041  |
| C | -6.437910 | -0.677888 | 0.236872  |
| H | -4.404969 | -2.017675 | -2.170521 |
| H | -6.354874 | -3.550377 | -2.387335 |
| H | -8.347884 | -3.242698 | -0.927717 |

|   |           |           |          |
|---|-----------|-----------|----------|
| H | -8.401837 | -1.403303 | 0.749968 |
| H | -6.443310 | 0.137063  | 0.968525 |

### 3b2

71

scf done: -2192.395084

|    |           |           |           |
|----|-----------|-----------|-----------|
| O  | -0.842489 | -1.618181 | -1.401553 |
| C  | -1.745072 | -2.313401 | -0.714631 |
| N  | -1.345216 | -2.632603 | 0.489309  |
| C  | -0.114699 | -2.090826 | 0.609677  |
| N  | 0.234981  | -1.464636 | -0.520508 |
| C  | -3.026821 | -2.599271 | -1.323529 |
| C  | 0.673667  | -2.185971 | 1.821692  |
| C  | -3.327510 | -2.158608 | -2.621733 |
| C  | -4.574614 | -2.437608 | -3.166533 |
| C  | -5.517800 | -3.150544 | -2.423729 |
| C  | -5.219415 | -3.588598 | -1.131765 |
| C  | -3.975854 | -3.315585 | -0.577733 |
| C  | 0.256562  | -3.118690 | 2.788957  |
| C  | 0.961102  | -3.258372 | 3.972962  |
| C  | 2.090838  | -2.470499 | 4.239209  |
| C  | 2.485026  | -1.527375 | 3.279666  |
| C  | 1.797668  | -1.383401 | 2.083949  |
| C  | 2.865473  | -2.647100 | 5.504582  |
| C  | 1.371188  | -0.756885 | -0.993586 |
| C  | 2.517099  | -1.634576 | -1.321926 |
| C  | 1.246370  | 0.615293  | -0.953064 |
| C  | 3.815320  | -1.300531 | -0.903828 |
| C  | 4.888679  | -2.146174 | -1.168954 |
| C  | 4.685493  | -3.350016 | -1.842717 |
| C  | 3.398560  | -3.703602 | -2.246840 |
| C  | 2.325585  | -2.855125 | -1.988381 |
| Au | -0.422637 | 1.453097  | 0.037627  |
| N  | 2.185412  | 1.408542  | -1.584670 |
| S  | 2.360523  | 3.053559  | -1.133594 |
| C  | 2.958192  | 1.015406  | -2.763548 |
| O  | 2.015835  | 3.180654  | 0.276536  |
| O  | 3.675251  | 3.449063  | -1.607774 |
| C  | 1.133048  | 3.907526  | -2.096231 |
| C  | -2.062474 | 2.264345  | 1.021420  |
| N  | -3.254989 | 1.674451  | 1.267534  |
| C  | -4.085875 | 2.526508  | 1.968325  |
| C  | -3.391089 | 3.677960  | 2.157433  |
| N  | -2.154312 | 3.495931  | 1.570654  |
| C  | -1.119666 | 4.513684  | 1.533742  |
| C  | -3.592754 | 0.318353  | 0.880567  |
| H  | -2.582473 | -1.601379 | -3.199937 |
| H  | -4.814833 | -2.099296 | -4.179780 |
| H  | -6.499171 | -3.369240 | -2.858940 |
| H  | -5.963001 | -4.149570 | -0.556188 |
| H  | -3.720730 | -3.652965 | 0.432707  |
| H  | -0.626840 | -3.734391 | 2.592505  |
| H  | 0.630965  | -3.992982 | 4.717252  |
| H  | 3.352304  | -0.887537 | 3.480930  |
| H  | 2.118544  | -0.626016 | 1.362897  |
| H  | 3.391526  | -1.720809 | 5.794268  |
| H  | 2.215417  | -2.961319 | 6.340045  |
| H  | 3.635898  | -3.433542 | 5.380944  |
| H  | 3.982826  | -0.366495 | -0.352226 |

|   |           |           |           |
|---|-----------|-----------|-----------|
| H | 5.893944  | -1.866834 | -0.833601 |
| H | 5.530590  | -4.016509 | -2.047825 |
| H | 3.228631  | -4.648400 | -2.775593 |
| H | 1.319901  | -3.140157 | -2.323748 |
| H | 3.997524  | 0.735074  | -2.520267 |
| H | 2.454036  | 0.160292  | -3.241319 |
| H | 2.988395  | 1.849887  | -3.485050 |
| H | 1.233443  | 4.977425  | -1.846010 |
| H | 1.345529  | 3.745589  | -3.165690 |
| H | 0.133144  | 3.530239  | -1.818268 |
| H | -5.093552 | 2.238963  | 2.268492  |
| H | -3.664988 | 4.608745  | 2.654092  |
| H | -1.421340 | 5.341211  | 0.867771  |
| H | -0.953064 | 4.911682  | 2.548509  |
| H | -0.180934 | 4.067790  | 1.164890  |
| H | -3.070566 | -0.415756 | 1.520961  |
| H | -4.680195 | 0.173310  | 0.981352  |
| H | -3.308215 | 0.149369  | -0.172815 |

### TS<sub>4b1</sub>

71

scf done: -2192.381146

|    |           |           |           |
|----|-----------|-----------|-----------|
| N  | -1.751734 | -0.209419 | -0.866388 |
| O  | -2.929491 | -1.385157 | -0.382618 |
| C  | -3.965760 | -0.640756 | -0.274498 |
| C  | -5.264482 | -1.232214 | 0.028244  |
| N  | -3.805743 | 0.671611  | -0.466147 |
| C  | -2.533696 | 0.879586  | -0.784864 |
| C  | -0.464776 | -0.511874 | -0.598181 |
| N  | 0.114475  | -1.477524 | -1.442777 |
| C  | 0.351261  | -1.195374 | -2.846011 |
| H  | 0.756577  | -2.090242 | -3.346211 |
| H  | -0.588174 | -0.899964 | -3.352471 |
| H  | 1.099807  | -0.385390 | -2.952869 |
| S  | 0.518698  | -2.971931 | -0.790767 |
| O  | 1.748396  | -3.415985 | -1.439030 |
| O  | 0.439146  | -2.839797 | 0.658909  |
| C  | -0.795008 | -4.045476 | -1.316906 |
| H  | -0.823812 | -4.062860 | -2.418950 |
| H  | -0.566466 | -5.050802 | -0.924846 |
| H  | -1.738718 | -3.661579 | -0.895249 |
| C  | 0.269538  | 0.144112  | 0.389060  |
| C  | -0.401076 | 0.892278  | 1.435349  |
| Au | 2.341067  | -0.019465 | 0.307648  |
| C  | 4.400467  | -0.342326 | 0.285293  |
| N  | 4.994128  | -1.533950 | 0.519892  |
| C  | 4.278467  | -2.762445 | 0.827930  |
| H  | 3.528277  | -2.978213 | 0.047664  |
| H  | 5.003119  | -3.590232 | 0.873823  |
| H  | 3.768568  | -2.672683 | 1.802435  |
| C  | 6.366514  | -1.416433 | 0.446952  |
| H  | 7.030007  | -2.266484 | 0.606025  |
| C  | 6.633486  | -0.116794 | 0.156078  |
| H  | 7.577243  | 0.407179  | 0.005487  |
| N  | 5.413644  | 0.524385  | 0.061648  |
| C  | 5.265662  | 1.935348  | -0.231074 |
| H  | 4.192142  | 2.169275  | -0.305892 |
| H  | 5.714407  | 2.543724  | 0.572739  |
| H  | 5.758021  | 2.178783  | -1.187810 |
| C  | -2.027144 | 2.219782  | -1.069152 |



|   |           |           |           |
|---|-----------|-----------|-----------|
| C | -1.535617 | 0.380533  | 2.097837  |
| C | -2.178121 | 1.130300  | 3.075944  |
| C | -1.717130 | 2.409868  | 3.391599  |
| C | -0.585489 | 2.924251  | 2.754890  |
| C | 0.084695  | 2.161455  | 1.807567  |
| H | -1.879941 | -0.634493 | 1.863364  |
| H | -3.045270 | 0.714235  | 3.600645  |
| H | -2.232817 | 3.003738  | 4.154549  |
| H | -0.214793 | 3.921801  | 3.015092  |
| H | 0.984568  | 2.550031  | 1.314119  |
| C | -6.392721 | -0.405100 | 0.132639  |
| C | -7.630816 | -0.964748 | 0.422941  |
| C | -7.746403 | -2.343575 | 0.607699  |
| C | -6.624994 | -3.169569 | 0.503774  |
| C | -5.383788 | -2.618002 | 0.215152  |
| H | -6.279905 | 0.672998  | -0.020020 |
| H | -8.514916 | -0.323642 | 0.504430  |
| H | -8.724632 | -2.781658 | 0.835438  |
| H | -6.723345 | -4.250348 | 0.649876  |
| H | -4.496745 | -3.255584 | 0.131166  |
| C | -0.854916 | 2.454398  | -1.803503 |
| C | -0.411254 | 3.752111  | -2.003764 |
| C | -1.110173 | 4.848913  | -1.475435 |
| C | -2.282216 | 4.602400  | -0.748828 |
| C | -2.747179 | 3.309051  | -0.556375 |
| H | -0.289033 | 1.619652  | -2.231842 |
| H | 0.500081  | 3.928262  | -2.587946 |
| C | -0.633326 | 6.245567  | -1.714316 |
| H | -2.840287 | 5.446629  | -0.326248 |
| H | -3.662455 | 3.121533  | 0.014227  |
| H | -0.938301 | 6.926041  | -0.900124 |
| H | 0.465113  | 6.289801  | -1.818524 |
| H | -1.063598 | 6.649317  | -2.651913 |

#### 4b1

71

scf done: -2192.413441

|   |           |           |           |
|---|-----------|-----------|-----------|
| C | -3.617472 | -0.814637 | -1.890213 |
| O | -3.618971 | -1.558057 | -2.849971 |
| C | -4.649013 | -0.897709 | -0.815783 |
| N | -2.700993 | 0.222108  | -1.755034 |
| C | -1.434173 | 0.063034  | -1.779504 |
| C | -5.585452 | -1.936353 | -0.874444 |
| C | -6.547572 | -2.069457 | 0.121206  |
| C | -6.582300 | -1.163669 | 1.182926  |
| C | -5.653984 | -0.124223 | 1.245036  |
| C | -4.691002 | 0.009905  | 0.248363  |
| N | -0.604569 | 1.149086  | -2.013197 |
| C | 0.064312  | 1.810120  | -1.150105 |
| C | -0.031006 | 1.432801  | 0.272122  |
| N | 0.977905  | 2.760784  | -1.586556 |
| S | 2.018150  | 3.483262  | -0.451845 |
| C | 1.418557  | 2.702068  | -2.975970 |
| O | 1.344878  | 3.286435  | 0.834288  |
| O | 3.367068  | 2.991748  | -0.674435 |
| C | 1.945670  | 5.204858  | -0.855079 |
| C | -0.715054 | -1.227434 | -1.590192 |
| C | -1.174908 | -2.152674 | -0.643552 |
| C | -0.466256 | -3.323151 | -0.402127 |
| C | 0.713246  | -3.614994 | -1.101733 |

|    |           |           |           |
|----|-----------|-----------|-----------|
| C  | 1.161457  | -2.688492 | -2.049535 |
| C  | 0.466382  | -1.505759 | -2.286472 |
| C  | -1.170892 | 1.813473  | 1.026736  |
| C  | -1.403873 | 1.216224  | 2.290658  |
| C  | -2.485787 | 1.603026  | 3.062688  |
| C  | -3.347057 | 2.599056  | 2.590258  |
| C  | -3.142701 | 3.200917  | 1.342333  |
| C  | -2.067815 | 2.811152  | 0.563582  |
| C  | 1.450911  | -4.895010 | -0.855431 |
| Au | 1.382446  | -0.020496 | 0.706897  |
| C  | 2.811748  | -1.507603 | 0.931111  |
| N  | 3.943979  | -1.611629 | 0.200664  |
| C  | 4.613497  | -2.778010 | 0.509227  |
| C  | 3.880070  | -3.408808 | 1.463936  |
| N  | 2.778342  | -2.613014 | 1.706538  |
| C  | 1.765444  | -2.908184 | 2.700545  |
| C  | 4.356628  | -0.664383 | -0.820750 |
| H  | -5.538530 | -2.633568 | -1.718201 |
| H  | -7.279422 | -2.883549 | 0.070929  |
| H  | -7.342828 | -1.266653 | 1.965597  |
| H  | -5.689069 | 0.593785  | 2.073613  |
| H  | -3.970439 | 0.835936  | 0.278662  |
| H  | 0.531888  | 2.688765  | -3.629010 |
| H  | 2.024485  | 3.590043  | -3.215553 |
| H  | 2.020573  | 1.791485  | -3.158861 |
| H  | 2.562618  | 5.708698  | -0.091500 |
| H  | 2.373705  | 5.376093  | -1.855194 |
| H  | 0.896682  | 5.533634  | -0.789874 |
| H  | -2.087383 | -1.940078 | -0.070562 |
| H  | -0.836434 | -4.033976 | 0.348393  |
| H  | 2.075288  | -2.904029 | -2.619069 |
| H  | 0.835137  | -0.790013 | -3.031225 |
| H  | -0.705767 | 0.447033  | 2.644144  |
| H  | -2.664587 | 1.140018  | 4.038107  |
| H  | -4.199135 | 2.911822  | 3.204972  |
| H  | -3.832340 | 3.972543  | 0.985967  |
| H  | -1.905933 | 3.272077  | -0.418355 |
| H  | 2.452723  | -4.886646 | -1.319852 |
| H  | 1.575459  | -5.095061 | 0.226157  |
| H  | 0.899151  | -5.758926 | -1.274165 |
| H  | 5.553722  | -3.051697 | 0.030313  |
| H  | 4.047864  | -4.344656 | 1.997560  |
| H  | 1.467884  | -3.967517 | 2.626363  |
| H  | 2.148545  | -2.710340 | 3.716630  |
| H  | 0.884927  | -2.273115 | 2.511524  |
| H  | 5.438411  | -0.773263 | -0.996446 |
| H  | 3.814270  | -0.856789 | -1.764225 |
| H  | 4.148811  | 0.366084  | -0.487113 |

# TS<sub>4b2</sub>

71

scf done: -2192.379040

|    |           |           |           |
|----|-----------|-----------|-----------|
| N  | -1.715325 | -0.355617 | -0.503859 |
| C  | -0.488852 | -0.749076 | -0.130192 |
| C  | 0.295241  | 0.020667  | 0.757560  |
| Au | 2.374629  | -0.132586 | 0.450609  |
| C  | 4.415669  | -0.338241 | 0.098211  |
| N  | 4.996631  | -1.062834 | -0.885576 |
| C  | 4.294596  | -1.820631 | -1.903977 |
| H  | 4.513491  | -2.897133 | -1.798666 |

|   |           |           |           |
|---|-----------|-----------|-----------|
| H | 3.209586  | -1.666640 | -1.784279 |
| H | 4.603919  | -1.482412 | -2.907474 |
| C | 6.372345  | -1.000617 | -0.789683 |
| H | 7.024747  | -1.519307 | -1.492280 |
| C | 6.653497  | -0.215675 | 0.282009  |
| H | 7.603472  | 0.097608  | 0.715252  |
| N | 5.441466  | 0.180281  | 0.811477  |
| C | 5.312946  | 1.026471  | 1.981388  |
| H | 5.742878  | 0.525577  | 2.865401  |
| H | 4.243684  | 1.221410  | 2.162021  |
| H | 5.835549  | 1.983852  | 1.816544  |
| N | -0.192282 | 0.942914  | 1.632452  |
| C | 0.711235  | 1.976524  | 2.148903  |
| H | 1.457481  | 1.547757  | 2.843266  |
| H | 1.217547  | 2.458908  | 1.297001  |
| H | 0.139777  | 2.747328  | 2.690732  |
| S | -1.556204 | 0.658519  | 2.703431  |
| O | -1.020187 | 0.839296  | 4.041273  |
| O | -2.171615 | -0.590675 | 2.302136  |
| C | -2.669354 | 2.004768  | 2.379524  |
| H | -2.137965 | 2.962072  | 2.500483  |
| H | -3.452983 | 1.912974  | 3.151482  |
| H | -3.108521 | 1.901069  | 1.374391  |
| O | -3.019453 | -1.356575 | -0.162228 |
| C | -3.998642 | -0.557883 | -0.362267 |
| C | -5.370401 | -1.028566 | -0.203022 |
| N | -3.700573 | 0.688872  | -0.736677 |
| C | -2.372573 | 0.749147  | -0.849215 |
| C | -1.703529 | 1.952145  | -1.352587 |
| C | 0.067714  | -1.914689 | -0.854741 |
| C | -0.175447 | -2.089336 | -2.224426 |
| C | 0.355306  | -3.182037 | -2.904507 |
| C | 1.125790  | -4.125571 | -2.223186 |
| C | 1.356461  | -3.972965 | -0.856485 |
| C | 0.827202  | -2.878424 | -0.175426 |
| H | -0.785643 | -1.354397 | -2.765275 |
| H | 0.162483  | -3.300714 | -3.976761 |
| H | 1.533591  | -4.991213 | -2.757514 |
| H | 1.937554  | -4.723928 | -0.308976 |
| H | 0.975898  | -2.781101 | 0.907322  |
| C | -6.437024 | -0.174184 | -0.517862 |
| C | -7.743834 | -0.618447 | -0.358838 |
| C | -7.988317 | -1.910009 | 0.111550  |
| C | -6.927810 | -2.762052 | 0.425574  |
| C | -5.618210 | -2.325501 | 0.270335  |
| H | -6.224007 | 0.832895  | -0.890869 |
| H | -8.580524 | 0.043944  | -0.605334 |
| H | -9.020185 | -2.257529 | 0.235295  |
| H | -7.126492 | -3.773107 | 0.796467  |
| H | -4.776592 | -2.980473 | 0.519375  |
| C | -0.373289 | 1.962546  | -1.801237 |
| C | 0.191536  | 3.137030  | -2.275958 |
| C | -0.539644 | 4.334159  | -2.316954 |
| C | -1.867520 | 4.312230  | -1.872522 |
| C | -2.448629 | 3.140436  | -1.407553 |
| H | 0.226762  | 1.045468  | -1.794738 |
| H | 1.229892  | 3.130024  | -2.630036 |
| C | 0.073790  | 5.587135  | -2.854406 |
| H | -2.458352 | 5.235861  | -1.897661 |
| H | -3.492484 | 3.131103  | -1.077005 |
| H | -0.406691 | 6.489348  | -2.437592 |

|   |           |          |           |
|---|-----------|----------|-----------|
| H | 1.156664  | 5.634442 | -2.642788 |
| H | -0.041890 | 5.636483 | -3.954981 |

# 4b2

71

scf done: -2192.425423

|    |           |           |           |
|----|-----------|-----------|-----------|
| N  | -1.237361 | 0.047585  | 2.013612  |
| C  | -1.757823 | -0.661442 | 1.085475  |
| C  | -1.380359 | -0.443657 | -0.345706 |
| N  | 0.857307  | 0.893997  | 2.270374  |
| C  | -0.309174 | 1.062637  | 1.775085  |
| C  | -2.627501 | -1.811368 | 1.396571  |
| C  | -3.270735 | -1.869687 | 2.639377  |
| C  | -4.090630 | -2.947378 | 2.947678  |
| C  | -4.263736 | -3.984757 | 2.027827  |
| C  | -3.612639 | -3.942891 | 0.796138  |
| C  | -2.797958 | -2.857365 | 0.479030  |
| Au | 0.607216  | -0.978229 | -0.778637 |
| N  | -2.208437 | 0.058508  | -1.213837 |
| C  | -1.828866 | 0.407289  | -2.587279 |
| S  | -3.931794 | 0.615457  | -0.840292 |
| O  | -4.056695 | 0.655172  | 0.600487  |
| O  | -4.114597 | 1.782080  | -1.677952 |
| C  | -4.865533 | -0.746115 | -1.483332 |
| C  | -0.752283 | 2.203595  | 0.935816  |
| C  | -2.014044 | 2.778936  | 1.122959  |
| C  | -2.464583 | 3.769893  | 0.261096  |
| C  | -1.687538 | 4.200437  | -0.822313 |
| C  | -0.417258 | 3.635846  | -0.988831 |
| C  | 0.051509  | 2.657532  | -0.117109 |
| C  | -2.228420 | 5.209593  | -1.785217 |
| C  | 1.830261  | 1.886392  | 2.308997  |
| C  | 3.192359  | 1.425577  | 1.908852  |
| O  | 1.616576  | 3.015786  | 2.696632  |
| C  | 3.512682  | 0.066864  | 1.789609  |
| C  | 4.805246  | -0.316604 | 1.439325  |
| C  | 5.778345  | 0.652315  | 1.190019  |
| C  | 5.463010  | 2.008020  | 1.305183  |
| C  | 4.177524  | 2.392636  | 1.674378  |
| C  | 2.582248  | -1.472481 | -1.181350 |
| N  | 3.177250  | -2.675879 | -1.035185 |
| C  | 4.505590  | -2.605931 | -1.402739 |
| C  | 4.738534  | -1.320893 | -1.779268 |
| N  | 3.544782  | -0.645153 | -1.641806 |
| C  | 3.378180  | 0.780991  | -1.853079 |
| C  | 2.503072  | -3.879000 | -0.579519 |
| H  | -3.123350 | -1.048199 | 3.348686  |
| H  | -4.602607 | -2.982759 | 3.915374  |
| H  | -4.907242 | -4.835692 | 2.277304  |
| H  | -3.732208 | -4.764583 | 0.081429  |
| H  | -2.274560 | -2.841297 | -0.487291 |
| H  | -0.922775 | -0.158391 | -2.853848 |
| H  | -2.642020 | 0.157105  | -3.287851 |
| H  | -1.632099 | 1.492715  | -2.641073 |
| H  | -5.921714 | -0.452890 | -1.349909 |
| H  | -4.642439 | -0.875094 | -2.554220 |
| H  | -4.632748 | -1.645451 | -0.887754 |
| H  | -2.648341 | 2.439263  | 1.948379  |
| H  | -3.457693 | 4.210194  | 0.415748  |

|   |           |           |           |
|---|-----------|-----------|-----------|
| H | 0.216965  | 3.973265  | -1.818613 |
| H | 1.050421  | 2.225681  | -0.268467 |
| H | -1.441252 | 5.614966  | -2.444471 |
| H | -3.006816 | 4.752912  | -2.428190 |
| H | -2.707290 | 6.055124  | -1.258638 |
| H | 2.742674  | -0.683169 | 2.005218  |
| H | 5.062353  | -1.380653 | 1.374882  |
| H | 6.796554  | 0.348844  | 0.918420  |
| H | 6.230822  | 2.767777  | 1.120429  |
| H | 3.912169  | 3.449095  | 1.793854  |
| H | 5.163171  | -3.474357 | -1.368434 |
| H | 5.645736  | -0.828987 | -2.130714 |
| H | 4.193751  | 1.149252  | -2.494833 |
| H | 2.413891  | 0.971484  | -2.353081 |
| H | 3.405279  | 1.316987  | -0.885745 |
| H | 3.251615  | -4.671029 | -0.424254 |
| H | 1.984665  | -3.682037 | 0.373645  |
| H | 1.769765  | -4.218881 | -1.330458 |

# **TS<sub>5b1</sub>**

71

scf done: -2192.366490

|   |           |           |           |
|---|-----------|-----------|-----------|
| C | -0.283266 | 0.822975  | 0.775342  |
| N | 1.119606  | 0.241610  | -1.027034 |
| C | 2.158590  | 1.084766  | -0.700769 |
| N | 1.623711  | 2.185854  | -0.249772 |
| C | 0.285745  | 1.759495  | -0.242508 |
| C | 0.387260  | 0.676281  | 2.031267  |
| C | 1.269483  | 1.650598  | 2.571424  |
| C | 1.897789  | 1.432074  | 3.787260  |
| C | 1.684562  | 0.237196  | 4.481466  |
| C | 0.811995  | -0.732794 | 3.979404  |
| C | 0.153922  | -0.505069 | 2.782956  |
| C | 1.023307  | -1.148649 | -1.131654 |
| O | 0.053058  | -1.640847 | -1.675512 |
| C | 2.090817  | -2.006744 | -0.541537 |
| C | 2.385808  | -3.210900 | -1.192365 |
| C | 3.380066  | -4.049111 | -0.699807 |
| C | 4.064751  | -3.706651 | 0.467281  |
| C | 3.749337  | -2.527557 | 1.142929  |
| C | 2.771961  | -1.676322 | 0.636470  |
| N | -0.567421 | 2.501929  | -1.001684 |
| C | -0.129499 | 3.029801  | -2.288501 |
| S | -2.101007 | 3.016571  | -0.393970 |
| O | -3.152978 | 2.511942  | -1.257840 |
| O | -2.066528 | 2.730495  | 1.035904  |
| C | -1.995226 | 4.776223  | -0.597517 |
| C | 3.589480  | 0.852658  | -0.873239 |
| C | 4.085384  | 0.005548  | -1.873192 |
| C | 5.448842  | -0.232297 | -1.971622 |
| C | 6.352675  | 0.360115  | -1.077778 |
| C | 5.848548  | 1.226773  | -0.098749 |
| C | 4.486504  | 1.480029  | 0.000466  |
| C | 7.816072  | 0.059469  | -1.159996 |
| H | 1.438896  | 2.586237  | 2.031859  |
| H | 2.561281  | 2.196643  | 4.204588  |
| H | 2.196098  | 0.066072  | 5.435457  |
| H | 0.641541  | -1.660853 | 4.534219  |
| H | -0.539477 | -1.254234 | 2.380344  |
| H | 1.830786  | -3.470971 | -2.100682 |

|    |           |           |           |
|----|-----------|-----------|-----------|
| H  | 3.621736  | -4.979725 | -1.225129 |
| H  | 4.846642  | -4.368030 | 0.857466  |
| H  | 4.271916  | -2.265286 | 2.069857  |
| H  | 2.539669  | -0.749409 | 1.175097  |
| H  | -1.016066 | 3.180955  | -2.927719 |
| H  | 0.436901  | 3.972639  | -2.184687 |
| H  | 0.503782  | 2.271191  | -2.776558 |
| H  | -2.911940 | 5.165717  | -0.122056 |
| H  | -1.101312 | 5.144307  | -0.069155 |
| H  | -1.987061 | 5.040808  | -1.665846 |
| H  | 3.398150  | -0.465817 | -2.585610 |
| H  | 6.544198  | 1.712777  | 0.596415  |
| H  | 4.098684  | 2.155479  | 0.772398  |
| H  | 8.058158  | -0.868723 | -0.605938 |
| H  | 8.141098  | -0.096275 | -2.204100 |
| H  | 8.425238  | 0.869188  | -0.721491 |
| H  | 5.829274  | -0.891913 | -2.761271 |
| Au | -1.967465 | -0.304922 | 0.255886  |
| C  | -3.614842 | -1.414066 | -0.342263 |
| N  | -3.943933 | -1.662834 | -1.628758 |
| C  | -5.100106 | -2.410926 | -1.697726 |
| C  | -5.497614 | -2.636097 | -0.417657 |
| N  | -4.572314 | -2.015458 | 0.397725  |
| C  | -3.197526 | -1.163767 | -2.772593 |
| C  | -4.630467 | -2.024576 | 1.845187  |
| H  | -5.536648 | -2.718777 | -2.647919 |
| H  | -6.350263 | -3.183173 | -0.015363 |
| H  | -3.413390 | -0.092307 | -2.928897 |
| H  | -3.496465 | -1.731147 | -3.668108 |
| H  | -2.116814 | -1.297904 | -2.595009 |
| H  | -5.578121 | -1.578892 | 2.191753  |
| H  | -3.789376 | -1.428698 | 2.233394  |
| H  | -4.553381 | -3.057438 | 2.225575  |

### 5b1

71

scf done: -2192.390075

|   |           |           |           |
|---|-----------|-----------|-----------|
| C | -0.348605 | 0.804301  | 0.774153  |
| N | 1.249737  | -0.049347 | -0.760843 |
| C | 2.334027  | 0.837157  | -0.604611 |
| N | 1.673851  | 1.934126  | -0.396355 |
| C | 0.419337  | 1.150071  | -0.487856 |
| C | 0.188916  | 1.062509  | 2.071423  |
| C | 1.081219  | 2.124436  | 2.382174  |
| C | 1.569524  | 2.275166  | 3.669476  |
| C | 1.207416  | 1.367235  | 4.669839  |
| C | 0.321326  | 0.322175  | 4.396175  |
| C | -0.205697 | 0.191596  | 3.122294  |
| C | 0.956887  | -1.405344 | -0.958590 |
| O | -0.082524 | -1.738485 | -1.485142 |
| C | 1.984151  | -2.354628 | -0.472818 |
| C | 2.216737  | -3.526701 | -1.201663 |
| C | 3.186395  | -4.426704 | -0.773277 |
| C | 3.897028  | -4.177850 | 0.402824  |
| C | 3.635519  | -3.033091 | 1.155616  |
| C | 2.686728  | -2.116026 | 0.714931  |
| N | -0.445292 | 1.547645  | -1.564906 |
| C | -0.040245 | 1.306545  | -2.938801 |
| S | -1.349523 | 2.925373  | -1.232941 |
| O | -2.574577 | 2.860289  | -2.012010 |

|    |           |           |           |
|----|-----------|-----------|-----------|
| O  | -1.382179 | 2.982107  | 0.234294  |
| C  | -0.378381 | 4.298171  | -1.801352 |
| C  | 3.766385  | 0.601250  | -0.660659 |
| C  | 4.336110  | -0.388350 | -1.473730 |
| C  | 5.712348  | -0.563956 | -1.490837 |
| C  | 6.554611  | 0.230180  | -0.698926 |
| C  | 5.974664  | 1.226831  | 0.097280  |
| C  | 4.599120  | 1.417891  | 0.116159  |
| C  | 8.033381  | 0.002619  | -0.691973 |
| H  | 1.344425  | 2.843686  | 1.603612  |
| H  | 2.236427  | 3.110880  | 3.906190  |
| H  | 1.609290  | 1.487123  | 5.682440  |
| H  | 0.030838  | -0.376201 | 5.187600  |
| H  | -0.919090 | -0.610621 | 2.896462  |
| H  | 1.639587  | -3.710823 | -2.114972 |
| H  | 3.387381  | -5.333175 | -1.354514 |
| H  | 4.656786  | -4.891340 | 0.741199  |
| H  | 4.178350  | -2.852673 | 2.089690  |
| H  | 2.480651  | -1.214723 | 1.306730  |
| H  | -0.825747 | 1.698914  | -3.606919 |
| H  | 0.927759  | 1.787500  | -3.189332 |
| H  | 0.026768  | 0.217625  | -3.106298 |
| H  | -0.916235 | 5.208963  | -1.487926 |
| H  | 0.612193  | 4.233665  | -1.320428 |
| H  | -0.303621 | 4.260705  | -2.900144 |
| H  | 3.702047  | -1.016634 | -2.109920 |
| H  | 6.620131  | 1.864880  | 0.713315  |
| H  | 4.150943  | 2.197046  | 0.744332  |
| H  | 8.307213  | -0.782240 | 0.040172  |
| H  | 8.397192  | -0.336741 | -1.678064 |
| H  | 8.586150  | 0.916090  | -0.411131 |
| H  | 6.151263  | -1.334425 | -2.136589 |
| Au | -2.111979 | -0.224300 | 0.420078  |
| C  | -3.902922 | -1.112651 | -0.133299 |
| N  | -4.293167 | -1.217004 | -1.423112 |
| C  | -5.535222 | -1.808095 | -1.507507 |
| C  | -5.924945 | -2.081514 | -0.233849 |
| N  | -4.908978 | -1.645470 | 0.592789  |
| C  | -3.507642 | -0.730907 | -2.547021 |
| C  | -4.931321 | -1.755365 | 2.037292  |
| H  | -6.033387 | -1.981551 | -2.461378 |
| H  | -6.830071 | -2.546985 | 0.156094  |
| H  | -3.473009 | 0.373418  | -2.540256 |
| H  | -3.972414 | -1.079307 | -3.482810 |
| H  | -2.478853 | -1.125149 | -2.477480 |
| H  | -5.816431 | -1.237997 | 2.444292  |
| H  | -4.020403 | -1.283239 | 2.437903  |
| H  | -4.957330 | -2.815586 | 2.341702  |

# TS<sub>5b2</sub>

71

scf done: -2192.376423

|    |           |           |           |
|----|-----------|-----------|-----------|
| C  | 0.758531  | -1.948383 | 1.126541  |
| N  | 0.998929  | -1.063684 | 0.096305  |
| C  | 2.293953  | -0.661422 | -0.166131 |
| N  | 2.412341  | 0.627991  | -0.025240 |
| C  | 1.181209  | 0.919777  | 0.544750  |
| C  | 0.277533  | 1.649412  | -0.374310 |
| Au | -1.546950 | 0.692423  | -0.804603 |
| C  | -3.405115 | -0.187029 | -1.065488 |

|   |           |           |           |
|---|-----------|-----------|-----------|
| N | -3.894108 | -0.815196 | -2.155654 |
| C | -5.144273 | -1.339588 | -1.892174 |
| C | -5.437492 | -1.018212 | -0.604889 |
| N | -4.360342 | -0.306660 | -0.118480 |
| C | -4.225140 | 0.162549  | 1.248399  |
| C | -3.173461 | -1.013977 | -3.398295 |
| H | -5.716541 | -1.880243 | -2.646039 |
| H | -6.320435 | -1.221316 | 0.001374  |
| H | -3.500442 | -0.466489 | 1.798085  |
| H | -3.882903 | 1.210942  | 1.252611  |
| H | -5.205594 | 0.105050  | 1.746389  |
| H | -2.657277 | -1.991060 | -3.394394 |
| H | -3.879178 | -0.980685 | -4.243864 |
| H | -2.427495 | -0.212518 | -3.517510 |
| N | 0.632196  | 2.796744  | -0.874120 |
| C | -0.072171 | 3.450176  | -1.979773 |
| S | 2.154438  | 3.710014  | -0.353537 |
| H | -0.664541 | 4.307234  | -1.616213 |
| H | 0.669033  | 3.788825  | -2.724726 |
| H | -0.745023 | 2.718057  | -2.451677 |
| O | 2.422368  | 3.272800  | 0.998925  |
| O | 3.085008  | 3.577419  | -1.450935 |
| C | 1.537480  | 5.373711  | -0.275360 |
| H | 2.374542  | 5.940828  | 0.169091  |
| H | 1.316845  | 5.759784  | -1.281512 |
| H | 0.667056  | 5.401966  | 0.399632  |
| O | 1.594933  | -2.280928 | 1.953445  |
| C | -0.656672 | -2.408414 | 1.229634  |
| C | -1.431226 | -2.647952 | 0.088995  |
| C | -1.189040 | -2.675884 | 2.496044  |
| C | -2.722164 | -3.157231 | 0.214089  |
| H | -0.996683 | -2.459228 | -0.901145 |
| C | -2.491108 | -3.152293 | 2.622187  |
| H | -0.559227 | -2.504854 | 3.377152  |
| C | -3.257273 | -3.398089 | 1.479966  |
| H | -3.317756 | -3.372532 | -0.682605 |
| H | -2.908332 | -3.352073 | 3.615823  |
| H | -4.275786 | -3.793532 | 1.577288  |
| C | 3.364606  | -1.543165 | -0.616256 |
| C | 3.099516  | -2.868328 | -0.985074 |
| C | 4.676574  | -1.057511 | -0.703312 |
| C | 4.130235  | -3.692213 | -1.416477 |
| H | 2.072047  | -3.249903 | -0.944390 |
| C | 5.700499  | -1.888435 | -1.135950 |
| H | 4.878240  | -0.016945 | -0.424609 |
| C | 5.447789  | -3.220468 | -1.493638 |
| H | 3.913756  | -4.728044 | -1.706070 |
| H | 6.725184  | -1.501580 | -1.200155 |
| C | 6.561395  | -4.122872 | -1.923892 |
| H | 7.381110  | -3.559162 | -2.403594 |
| H | 6.997617  | -4.651335 | -1.053376 |
| H | 6.210199  | -4.897477 | -2.628536 |
| C | 0.941112  | 0.944069  | 1.983931  |
| C | 1.968414  | 0.561441  | 2.860244  |
| C | -0.303306 | 1.340674  | 2.506041  |
| C | 1.747733  | 0.564357  | 4.232309  |
| H | 2.943931  | 0.277138  | 2.453234  |
| C | -0.517127 | 1.341181  | 3.877677  |
| H | -1.115980 | 1.639649  | 1.830558  |
| C | 0.508557  | 0.950247  | 4.742207  |
| H | 2.552666  | 0.264842  | 4.911342  |



|   |           |          |          |
|---|-----------|----------|----------|
| H | -1.488999 | 1.647127 | 4.280170 |
| H | 0.339009  | 0.950414 | 5.824737 |

## 5b2

71

scf done: -2192.395386

|    |           |           |           |
|----|-----------|-----------|-----------|
| C  | 0.976145  | -1.764101 | 1.387547  |
| N  | 1.274164  | -0.852897 | 0.351585  |
| C  | 2.601497  | -0.488646 | 0.031866  |
| N  | 2.515175  | 0.801683  | 0.094022  |
| C  | 1.104207  | 0.671783  | 0.492835  |
| C  | 0.214968  | 1.239018  | -0.591680 |
| Au | -1.613285 | 0.304257  | -1.008930 |
| C  | -3.511342 | -0.526132 | -1.186409 |
| N  | -3.969940 | -1.424135 | -2.083598 |
| C  | -5.254553 | -1.818211 | -1.762595 |
| C  | -5.600927 | -1.137218 | -0.638703 |
| N  | -4.519791 | -0.346500 | -0.305890 |
| C  | -4.437090 | 0.505541  | 0.866648  |
| C  | -3.193333 | -1.980739 | -3.175086 |
| H  | -5.808811 | -2.533935 | -2.369515 |
| H  | -6.524324 | -1.133109 | -0.059477 |
| H  | -3.684344 | 0.108951  | 1.573021  |
| H  | -4.158817 | 1.531113  | 0.570722  |
| H  | -5.420092 | 0.531006  | 1.362128  |
| H  | -2.675084 | -2.902564 | -2.853883 |
| H  | -3.862686 | -2.218880 | -4.017126 |
| H  | -2.446000 | -1.241504 | -3.503875 |
| N  | 0.551440  | 2.358539  | -1.166892 |
| C  | -0.098843 | 2.835825  | -2.391878 |
| S  | 1.917152  | 3.522407  | -0.629097 |
| H  | -0.851435 | 3.611891  | -2.169739 |
| H  | 0.672930  | 3.235725  | -3.071721 |
| H  | -0.589475 | 1.984294  | -2.886481 |
| O  | 2.053031  | 3.400689  | 0.804152  |
| O  | 2.988018  | 3.351896  | -1.585200 |
| C  | 1.114443  | 5.086480  | -0.919651 |
| H  | 1.821167  | 5.810629  | -0.477690 |
| H  | 0.992829  | 5.289756  | -1.992912 |
| H  | 0.163116  | 5.114792  | -0.364760 |
| O  | 1.846417  | -2.349150 | 1.987348  |
| C  | -0.468017 | -1.991337 | 1.662415  |
| C  | -1.317094 | -2.438707 | 0.645207  |
| C  | -0.936671 | -1.907463 | 2.977869  |
| C  | -2.628942 | -2.804825 | 0.945015  |
| H  | -0.929523 | -2.547296 | -0.376141 |
| C  | -2.260444 | -2.226433 | 3.264585  |
| H  | -0.251692 | -1.583832 | 3.770966  |
| C  | -3.105081 | -2.683559 | 2.249327  |
| H  | -3.282597 | -3.195778 | 0.154782  |
| H  | -2.631750 | -2.143687 | 4.292055  |
| H  | -4.139569 | -2.963845 | 2.482208  |
| C  | 3.728462  | -1.314481 | -0.353192 |
| C  | 3.611261  | -2.693441 | -0.565906 |
| C  | 4.965009  | -0.686210 | -0.564600 |
| C  | 4.716507  | -3.427598 | -0.976179 |
| H  | 2.650115  | -3.195930 | -0.413209 |
| C  | 6.062564  | -1.430466 | -0.970050 |
| H  | 5.043879  | 0.395992  | -0.409627 |
| C  | 5.959917  | -2.813801 | -1.177969 |

|   |           |           |           |
|---|-----------|-----------|-----------|
| H | 4.618303  | -4.507102 | -1.144563 |
| H | 7.026941  | -0.933625 | -1.133360 |
| C | 7.156494  | -3.617196 | -1.580020 |
| H | 7.851263  | -3.028521 | -2.205195 |
| H | 7.725610  | -3.947255 | -0.688715 |
| H | 6.869714  | -4.527044 | -2.136312 |
| C | 0.734879  | 1.100043  | 1.892072  |
| C | 1.665855  | 0.923465  | 2.920668  |
| C | -0.521153 | 1.636072  | 2.191400  |
| C | 1.336107  | 1.262160  | 4.229130  |
| H | 2.661586  | 0.526758  | 2.691977  |
| C | -0.847282 | 1.982853  | 3.501632  |
| H | -1.266543 | 1.787487  | 1.398698  |
| C | 0.078905  | 1.791891  | 4.523880  |
| H | 2.073693  | 1.120686  | 5.026584  |
| H | -1.833824 | 2.405611  | 3.723348  |
| H | -0.175258 | 2.062634  | 5.554771  |

# **TS<sub>6b1B</sub>**

71

scf done: -2192.376607

|    |           |           |           |
|----|-----------|-----------|-----------|
| Au | 2.019466  | -0.506259 | 0.259170  |
| C  | 3.975697  | -1.199881 | 0.186647  |
| N  | 4.778623  | -1.566989 | 1.210638  |
| C  | 6.007702  | -1.981433 | 0.739451  |
| C  | 5.963603  | -1.869557 | -0.613981 |
| N  | 4.711710  | -1.386907 | -0.931618 |
| C  | 4.234491  | -1.150269 | -2.283357 |
| C  | 4.424833  | -1.532888 | 2.616345  |
| H  | 4.451921  | -2.550528 | 3.041592  |
| H  | 3.406836  | -1.124890 | 2.716518  |
| H  | 5.129335  | -0.888693 | 3.168868  |
| H  | 6.803079  | -2.310134 | 1.408289  |
| H  | 6.711877  | -2.084508 | -1.376860 |
| H  | 3.637260  | -0.223682 | -2.308310 |
| H  | 3.615548  | -1.997672 | -2.627149 |
| H  | 5.102353  | -1.043365 | -2.953107 |
| C  | 0.039549  | 0.101086  | 0.369473  |
| C  | -0.757440 | 0.300161  | -0.852871 |
| N  | -0.201545 | 1.002886  | -1.956402 |
| N  | -2.263478 | 0.363037  | -0.706706 |
| C  | -2.198533 | -1.019342 | -0.771125 |
| N  | -0.892984 | -1.175656 | -0.969049 |
| C  | -3.199330 | -2.052687 | -0.731399 |
| C  | -2.753503 | -3.386126 | -0.653715 |
| C  | -3.668039 | -4.425289 | -0.645247 |
| C  | -5.046594 | -4.172653 | -0.731493 |
| C  | -5.479695 | -2.841052 | -0.820574 |
| C  | -4.576828 | -1.789626 | -0.818791 |
| H  | -4.936586 | -0.759524 | -0.877275 |
| H  | -6.553978 | -2.630643 | -0.884936 |
| C  | -6.030242 | -5.296947 | -0.754462 |
| H  | -3.315771 | -5.460980 | -0.569692 |
| H  | -1.677865 | -3.587375 | -0.592218 |
| C  | -0.558029 | 0.170622  | 1.704694  |
| C  | -3.083133 | 1.166609  | 0.120177  |
| H  | -6.988029 | -5.009587 | -0.286161 |
| H  | -6.257145 | -5.592842 | -1.797812 |
| H  | -5.639825 | -6.192642 | -0.240774 |
| O  | -4.004192 | 0.691482  | 0.737351  |

|   |           |           |           |
|---|-----------|-----------|-----------|
| C | -2.725165 | 2.602172  | 0.158591  |
| C | -2.498995 | 3.327895  | -1.013492 |
| C | -2.280218 | 4.702104  | -0.939947 |
| C | -2.237617 | 5.337196  | 0.300582  |
| C | -2.455894 | 4.609019  | 1.471091  |
| C | -2.728488 | 3.247738  | 1.399704  |
| H | -2.535924 | 2.815952  | -1.983738 |
| H | -2.149989 | 5.289673  | -1.856759 |
| H | -2.048303 | 6.415052  | 0.354847  |
| H | -2.431593 | 5.112697  | 2.443493  |
| H | -2.934190 | 2.663861  | 2.305152  |
| S | 0.998923  | 2.161137  | -1.640357 |
| C | -0.126129 | 0.301670  | -3.233002 |
| C | 0.604134  | 3.504893  | -2.725915 |
| O | 0.775071  | 2.584563  | -0.259201 |
| O | 2.298817  | 1.656365  | -2.073265 |
| H | 0.093210  | 1.017310  | -4.042092 |
| H | 0.646899  | -0.490256 | -3.225458 |
| H | -1.107942 | -0.150890 | -3.451376 |
| H | 1.385832  | 4.258696  | -2.530654 |
| H | 0.668993  | 3.170423  | -3.772929 |
| H | -0.388441 | 3.903115  | -2.471992 |
| C | -1.511619 | -0.721387 | 2.216848  |
| C | -2.007915 | -0.552608 | 3.506845  |
| C | -1.568735 | 0.503191  | 4.300929  |
| C | -0.604116 | 1.381810  | 3.805757  |
| C | -0.081797 | 1.210931  | 2.529165  |
| H | -1.843891 | -1.578717 | 1.622793  |
| H | -2.747128 | -1.263126 | 3.891990  |
| H | -1.965654 | 0.633053  | 5.313592  |
| H | -0.242424 | 2.210242  | 4.425328  |
| H | 0.675401  | 1.900212  | 2.139388  |

### 6b1B

71

scf done: -2192.388167

|    |           |           |           |
|----|-----------|-----------|-----------|
| Au | 2.072587  | -0.546925 | 0.135473  |
| C  | 4.125879  | -0.851197 | 0.097665  |
| N  | 4.925643  | -1.294622 | 1.094362  |
| C  | 6.237623  | -1.371113 | 0.670063  |
| C  | 6.251118  | -0.964525 | -0.625572 |
| N  | 4.949020  | -0.648353 | -0.955678 |
| C  | 4.513470  | -0.191127 | -2.263717 |
| C  | 4.491316  | -1.638508 | 2.433713  |
| H  | 4.695799  | -2.702847 | 2.640818  |
| H  | 3.408197  | -1.454993 | 2.512168  |
| H  | 5.018831  | -1.015876 | 3.176093  |
| H  | 7.041252  | -1.699849 | 1.328876  |
| H  | 7.069797  | -0.866430 | -1.338488 |
| H  | 3.789716  | 0.632612  | -2.147163 |
| H  | 4.043375  | -1.018145 | -2.824289 |
| H  | 5.390440  | 0.170045  | -2.823985 |
| C  | -0.018649 | -0.295145 | 0.215982  |
| C  | -0.744585 | 0.570680  | -0.718424 |
| N  | -0.234012 | 1.551346  | -1.562175 |
| N  | -2.250810 | 0.429896  | -0.574032 |
| C  | -2.087174 | -0.887569 | -0.844016 |
| N  | -0.724212 | -0.886084 | -1.072092 |
| C  | -2.950746 | -2.009365 | -0.969347 |
| C  | -2.351966 | -3.235086 | -1.343547 |

|   |           |           |           |
|---|-----------|-----------|-----------|
| C | -3.126568 | -4.366537 | -1.504762 |
| C | -4.520069 | -4.316479 | -1.321431 |
| C | -5.110577 | -3.092675 | -0.964135 |
| C | -4.349147 | -1.951780 | -0.788364 |
| H | -4.827497 | -1.016127 | -0.490434 |
| H | -6.195427 | -3.046119 | -0.814869 |
| C | -5.355427 | -5.533208 | -1.535947 |
| H | -2.656128 | -5.315980 | -1.786117 |
| H | -1.269165 | -3.269648 | -1.508220 |
| C | -0.636860 | -0.589731 | 1.533414  |
| C | -3.165916 | 1.060654  | 0.333269  |
| H | -6.300048 | -5.488544 | -0.967169 |
| H | -5.623795 | -5.628396 | -2.607014 |
| H | -4.812521 | -6.453770 | -1.258861 |
| O | -3.930431 | 0.396503  | 0.982890  |
| C | -3.103912 | 2.533588  | 0.371955  |
| C | -2.853904 | 3.290114  | -0.778713 |
| C | -2.960879 | 4.678113  | -0.727737 |
| C | -3.278150 | 5.310467  | 0.474244  |
| C | -3.517493 | 4.557291  | 1.625604  |
| C | -3.452339 | 3.171060  | 1.570695  |
| H | -2.612469 | 2.788534  | -1.724090 |
| H | -2.802431 | 5.273528  | -1.634250 |
| H | -3.351199 | 6.403038  | 0.512223  |
| H | -3.771526 | 5.057408  | 2.566169  |
| H | -3.668809 | 2.559314  | 2.453766  |
| S | 1.005740  | 2.573240  | -0.975596 |
| C | -0.258733 | 1.289328  | -2.996410 |
| C | 0.505999  | 4.181233  | -1.528033 |
| O | 0.918579  | 2.547897  | 0.476670  |
| O | 2.242801  | 2.246673  | -1.675788 |
| H | -0.085320 | 2.220681  | -3.560459 |
| H | 0.502916  | 0.541155  | -3.287729 |
| H | -1.261629 | 0.914854  | -3.268665 |
| H | 1.320104  | 4.852571  | -1.205402 |
| H | 0.421368  | 4.203839  | -2.625972 |
| H | -0.439456 | 4.448626  | -1.030930 |
| C | -1.023481 | -1.882491 | 1.899808  |
| C | -1.619023 | -2.112143 | 3.139148  |
| C | -1.812214 | -1.059096 | 4.031622  |
| C | -1.395560 | 0.225918  | 3.683161  |
| C | -0.810876 | 0.463878  | 2.441984  |
| H | -0.855538 | -2.716636 | 1.206035  |
| H | -1.932987 | -3.126629 | 3.410076  |
| H | -2.282648 | -1.241285 | 5.004213  |
| H | -1.534935 | 1.057349  | 4.384204  |
| H | -0.478439 | 1.471769  | 2.160700  |

# TS<sub>6b2B</sub>

71

scf done: -2192.383777

|    |          |           |           |
|----|----------|-----------|-----------|
| Au | 2.027486 | -0.381149 | 0.036091  |
| C  | 4.075733 | -0.542944 | -0.221517 |
| N  | 4.900275 | -1.472570 | 0.310168  |
| C  | 6.204950 | -1.245145 | -0.080761 |
| C  | 6.188300 | -0.144740 | -0.876375 |
| N  | 4.873064 | 0.269373  | -0.952139 |
| C  | 4.426781 | 1.443145  | -1.678046 |
| C  | 4.491849 | -2.571413 | 1.165872  |
| H  | 4.776127 | -3.533196 | 0.706618  |

|   |           |           |           |
|---|-----------|-----------|-----------|
| H | 3.398044  | -2.541872 | 1.293026  |
| H | 4.972837  | -2.482582 | 2.154591  |
| H | 7.024728  | -1.890486 | 0.235089  |
| H | 6.990990  | 0.375208  | -1.399309 |
| H | 4.616159  | 2.360143  | -1.092579 |
| H | 3.344600  | 1.359003  | -1.872089 |
| H | 4.962382  | 1.508443  | -2.639475 |
| C | -0.038712 | -0.179659 | 0.339857  |
| C | -0.744208 | 0.829374  | -0.473957 |
| C | -0.066788 | 2.012078  | -1.056550 |
| C | -0.168512 | 2.265058  | -2.426092 |
| C | 0.419084  | 3.408041  | -2.963602 |
| C | 1.110294  | 4.293489  | -2.134846 |
| C | 1.224750  | 4.032285  | -0.768717 |
| C | 0.640332  | 2.889275  | -0.230178 |
| H | 0.724608  | 2.676971  | 0.844100  |
| H | 1.771629  | 4.724513  | -0.119108 |
| H | 1.569741  | 5.193093  | -2.559840 |
| H | 0.340864  | 3.609114  | -4.037697 |
| H | -0.710529 | 1.559529  | -3.068261 |
| N | -2.245409 | 0.775694  | -0.369850 |
| C | -2.150417 | -0.453289 | -0.956038 |
| N | -0.817616 | -0.466696 | -1.195614 |
| C | -3.070477 | -1.511016 | -1.232820 |
| C | -2.506247 | -2.763186 | -1.557554 |
| C | -3.329349 | -3.839963 | -1.838102 |
| C | -4.726561 | -3.699554 | -1.833319 |
| C | -5.277405 | -2.442892 | -1.529244 |
| C | -4.471019 | -1.361034 | -1.222796 |
| H | -4.920808 | -0.394773 | -0.979753 |
| H | -6.367086 | -2.321349 | -1.534001 |
| C | -5.613264 | -4.865301 | -2.122931 |
| H | -2.888197 | -4.814384 | -2.078967 |
| H | -1.415484 | -2.871400 | -1.562934 |
| N | -0.700873 | -0.731562 | 1.433341  |
| C | -1.214360 | 0.115727  | 2.512963  |
| H | -1.041373 | 1.175737  | 2.259428  |
| H | -2.294277 | -0.043211 | 2.686414  |
| H | -0.653409 | -0.083226 | 3.444881  |
| S | -0.104331 | -2.269901 | 1.943552  |
| O | 0.308546  | -2.978950 | 0.741139  |
| O | 0.829817  | -2.093134 | 3.048789  |
| C | -1.597569 | -3.001549 | 2.559610  |
| H | -2.346405 | -3.004767 | 1.750244  |
| H | -1.950630 | -2.446055 | 3.443084  |
| H | -1.325802 | -4.031430 | 2.846838  |
| C | -3.206795 | 1.329357  | 0.518737  |
| H | -6.541034 | -4.553501 | -2.634136 |
| H | -5.103915 | -5.623734 | -2.742173 |
| H | -5.917279 | -5.363230 | -1.180868 |
| O | -4.086622 | 0.631164  | 0.961664  |
| C | -3.037583 | 2.757840  | 0.853434  |
| C | -2.556848 | 3.696118  | -0.068617 |
| C | -2.486660 | 5.040916  | 0.284008  |
| C | -2.883377 | 5.450080  | 1.556353  |
| C | -3.374391 | 4.519617  | 2.475455  |
| C | -3.466263 | 3.179964  | 2.120803  |
| H | -2.267110 | 3.382960  | -1.077543 |
| H | -2.121485 | 5.774062  | -0.443705 |
| H | -2.819267 | 6.508261  | 1.833613  |
| H | -3.694907 | 4.846303  | 3.470515  |

|   |           |          |          |
|---|-----------|----------|----------|
| H | -3.867408 | 2.438648 | 2.821728 |
|---|-----------|----------|----------|

# 6b2B

71

scf done: -2192.389430

|    |           |           |           |
|----|-----------|-----------|-----------|
| Au | 2.000063  | -0.491529 | 0.013418  |
| C  | 4.051678  | -0.791275 | -0.096995 |
| N  | 4.772911  | -1.769238 | 0.495386  |
| C  | 6.113039  | -1.640248 | 0.187646  |
| C  | 6.226519  | -0.551281 | -0.615621 |
| N  | 4.951498  | -0.046002 | -0.779064 |
| C  | 4.641086  | 1.147084  | -1.542240 |
| C  | 4.231299  | -2.832705 | 1.321537  |
| H  | 4.346509  | -3.806391 | 0.815392  |
| H  | 3.160349  | -2.643868 | 1.500388  |
| H  | 4.759349  | -2.861076 | 2.289472  |
| H  | 6.862591  | -2.336824 | 0.563440  |
| H  | 7.096741  | -0.091984 | -1.084970 |
| H  | 4.952705  | 2.052783  | -0.992722 |
| H  | 3.553161  | 1.188216  | -1.716309 |
| H  | 5.161546  | 1.114339  | -2.513717 |
| C  | -0.076922 | -0.215116 | 0.153265  |
| C  | -0.698316 | 0.950251  | -0.520949 |
| C  | 0.038760  | 2.096222  | -1.092893 |
| C  | -0.073106 | 2.393467  | -2.453148 |
| C  | 0.581176  | 3.507135  | -2.974942 |
| C  | 1.349176  | 4.319489  | -2.139209 |
| C  | 1.472452  | 4.015100  | -0.782672 |
| C  | 0.820726  | 2.901795  | -0.259926 |
| H  | 0.908512  | 2.654531  | 0.806471  |
| H  | 2.078978  | 4.651291  | -0.128613 |
| H  | 1.861786  | 5.196117  | -2.551262 |
| H  | 0.495465  | 3.741957  | -4.041615 |
| H  | -0.676661 | 1.745292  | -3.101216 |
| N  | -2.191448 | 0.955123  | -0.373205 |
| C  | -2.187556 | -0.290483 | -0.901367 |
| N  | -0.832238 | -0.366216 | -1.193356 |
| C  | -3.157396 | -1.293928 | -1.148668 |
| C  | -2.689987 | -2.498102 | -1.725099 |
| C  | -3.570292 | -3.536504 | -1.962400 |
| C  | -4.935692 | -3.408050 | -1.657036 |
| C  | -5.397480 | -2.196520 | -1.109963 |
| C  | -4.532088 | -1.150081 | -0.855179 |
| H  | -4.906937 | -0.223258 | -0.414655 |
| H  | -6.464245 | -2.084357 | -0.883966 |
| C  | -5.876519 | -4.541162 | -1.892757 |
| H  | -3.204222 | -4.470137 | -2.404882 |
| H  | -1.627506 | -2.593761 | -1.968099 |
| N  | -0.805567 | -0.717001 | 1.296346  |
| C  | -0.574789 | 0.099694  | 2.484617  |
| H  | -0.983911 | 1.111870  | 2.310513  |
| H  | -1.099974 | -0.331075 | 3.353665  |
| H  | 0.503788  | 0.187380  | 2.728414  |
| S  | -0.567225 | -2.394909 | 1.570580  |
| O  | -0.430714 | -3.022957 | 0.262988  |
| O  | 0.461318  | -2.595102 | 2.586591  |
| C  | -2.141897 | -2.845196 | 2.253890  |
| H  | -2.924306 | -2.623394 | 1.508818  |
| H  | -2.315559 | -2.295023 | 3.192340  |
| H  | -2.083049 | -3.927676 | 2.457549  |

|   |           |           |           |
|---|-----------|-----------|-----------|
| C | -3.009726 | 1.535525  | 0.651788  |
| H | -6.903098 | -4.187165 | -2.090895 |
| H | -5.547690 | -5.177031 | -2.732966 |
| H | -5.925009 | -5.190605 | -0.996008 |
| O | -3.820151 | 0.859730  | 1.232726  |
| C | -2.741658 | 2.957587  | 0.931762  |
| C | -2.349632 | 3.853783  | -0.071179 |
| C | -2.166277 | 5.198499  | 0.235253  |
| C | -2.359330 | 5.647505  | 1.541324  |
| C | -2.760992 | 4.759610  | 2.542430  |
| C | -2.967473 | 3.420645  | 2.236773  |
| H | -2.215925 | 3.506613  | -1.101291 |
| H | -1.871438 | 5.900157  | -0.552731 |
| H | -2.204265 | 6.705143  | 1.782278  |
| H | -2.920598 | 5.119559  | 3.564373  |
| H | -3.298811 | 2.711283  | 3.004070  |

# **TS<sub>6b1A</sub>**

71

scf done: -2192.371180

|    |           |           |           |
|----|-----------|-----------|-----------|
| C  | 0.679950  | -0.239790 | 1.735389  |
| N  | 1.271327  | 0.197883  | 0.524795  |
| C  | 2.598330  | 0.224815  | 0.047601  |
| N  | 2.469912  | 0.806426  | -1.104440 |
| C  | 1.041474  | 0.901256  | -1.005997 |
| C  | 0.255253  | -0.352119 | -1.093361 |
| Au | -1.790301 | -0.499600 | -0.630785 |
| C  | -3.781366 | -0.725638 | -0.083745 |
| N  | -4.320074 | -1.780353 | 0.567458  |
| C  | -5.631971 | -1.522040 | 0.910408  |
| C  | -5.916664 | -0.275918 | 0.449466  |
| N  | -4.770348 | 0.191128  | -0.160927 |
| C  | -4.628632 | 1.504029  | -0.761125 |
| C  | -3.601502 | -2.995227 | 0.903893  |
| H  | -6.250334 | -2.251056 | 1.433754  |
| H  | -6.835055 | 0.309879  | 0.486545  |
| H  | -5.628313 | 1.935162  | -0.926254 |
| H  | -4.049662 | 2.170142  | -0.096992 |
| H  | -4.112998 | 1.415734  | -1.731571 |
| H  | -2.989577 | -3.314111 | 0.044355  |
| H  | -2.944335 | -2.828615 | 1.776070  |
| H  | -4.325659 | -3.789526 | 1.143480  |
| C  | 0.897115  | -1.555101 | -1.605383 |
| O  | 1.192361  | -1.113755 | 2.392423  |
| C  | -0.591957 | 0.418389  | 2.118903  |
| C  | -1.519551 | -0.340516 | 2.845467  |
| C  | -0.866869 | 1.758688  | 1.824926  |
| C  | -2.738941 | 0.215616  | 3.214963  |
| H  | -1.269518 | -1.377789 | 3.100159  |
| C  | -2.077702 | 2.321576  | 2.221482  |
| H  | -0.117132 | 2.371151  | 1.313676  |
| C  | -3.020129 | 1.547013  | 2.898970  |
| H  | -3.474209 | -0.385995 | 3.762193  |
| H  | -2.279448 | 3.377705  | 2.007828  |
| H  | -3.976088 | 1.990049  | 3.202338  |
| C  | 3.846353  | -0.223077 | 0.639888  |
| C  | 3.980251  | -1.387320 | 1.408742  |
| C  | 4.987919  | 0.539225  | 0.337469  |
| C  | 5.237002  | -1.773994 | 1.858368  |
| H  | 3.098349  | -1.988165 | 1.643663  |

|   |           |           |           |
|---|-----------|-----------|-----------|
| C | 6.231319  | 0.150999  | 0.810373  |
| H | 4.874162  | 1.453234  | -0.256937 |
| C | 6.378827  | -1.012718 | 1.579650  |
| H | 5.337875  | -2.694265 | 2.446892  |
| H | 7.114976  | 0.759643  | 0.582120  |
| C | 7.718692  | -1.411490 | 2.112346  |
| H | 7.785128  | -2.501473 | 2.275876  |
| H | 8.534401  | -1.108210 | 1.432177  |
| H | 7.913802  | -0.924043 | 3.087769  |
| N | 0.495415  | 2.133943  | -1.237044 |
| S | 1.377655  | 3.549696  | -0.721295 |
| C | -0.828184 | 2.378754  | -1.801144 |
| H | -0.782553 | 3.267827  | -2.450999 |
| H | -1.122121 | 1.515508  | -2.420202 |
| H | -1.589508 | 2.555605  | -1.019818 |
| O | 0.368913  | 4.593691  | -0.671821 |
| O | 2.132163  | 3.197378  | 0.468812  |
| C | 2.486484  | 3.850678  | -2.066812 |
| H | 3.056712  | 4.755375  | -1.794495 |
| H | 3.144996  | 2.972628  | -2.166317 |
| H | 1.890600  | 4.030068  | -2.976913 |
| C | 0.565634  | -2.804202 | -1.038572 |
| C | 1.156152  | -3.970007 | -1.501987 |
| C | 2.044062  | -3.918760 | -2.580447 |
| C | 2.357251  | -2.697178 | -3.173668 |
| C | 1.812200  | -1.518075 | -2.675962 |
| H | -0.143951 | -2.840099 | -0.200789 |
| H | 0.913919  | -4.929938 | -1.033877 |
| H | 2.492371  | -4.842578 | -2.962600 |
| H | 3.047384  | -2.659463 | -4.023178 |
| H | 2.081159  | -0.560003 | -3.130011 |

# **TS<sub>6b2B'</sub>**

71

scf done: -2192.371753

|    |           |           |           |
|----|-----------|-----------|-----------|
| Au | 2.186530  | 0.478786  | -0.122481 |
| C  | 4.248141  | 0.651856  | 0.079976  |
| N  | 5.149004  | 0.571261  | -0.925297 |
| C  | 6.432167  | 0.743429  | -0.446043 |
| C  | 6.325586  | 0.931324  | 0.894735  |
| N  | 4.978545  | 0.870962  | 1.196173  |
| C  | 4.442680  | 1.014063  | 2.535051  |
| C  | 4.802213  | 0.365900  | -2.320553 |
| H  | 4.370851  | 1.286120  | -2.752023 |
| H  | 4.067717  | -0.451579 | -2.409922 |
| H  | 5.711934  | 0.097216  | -2.880017 |
| H  | 7.304618  | 0.712380  | -1.098641 |
| H  | 7.084353  | 1.096404  | 1.659609  |
| H  | 4.868178  | 0.242584  | 3.199564  |
| H  | 4.682069  | 2.012375  | 2.939316  |
| H  | 3.348079  | 0.894010  | 2.492769  |
| C  | 0.095146  | 0.292391  | -0.437952 |
| C  | -0.756836 | -0.318363 | 0.561194  |
| N  | -2.177519 | -0.093727 | 0.292203  |
| C  | -1.987026 | 1.262426  | 0.089449  |
| N  | -0.685252 | 1.518939  | 0.041897  |
| C  | -0.356187 | -0.729093 | 1.885720  |
| C  | -1.116729 | -0.360603 | 3.012211  |
| C  | -0.718487 | -0.762401 | 4.278017  |
| C  | 0.415439  | -1.567151 | 4.427697  |



|   |           |           |           |
|---|-----------|-----------|-----------|
| C | 1.158501  | -1.960655 | 3.314136  |
| C | 0.787919  | -1.531773 | 2.045174  |
| H | 1.345903  | -1.854887 | 1.159856  |
| H | 2.030981  | -2.610979 | 3.436524  |
| H | 0.717873  | -1.896974 | 5.427964  |
| H | -1.294223 | -0.453956 | 5.156688  |
| H | -2.010266 | 0.263186  | 2.885511  |
| C | -3.007020 | 2.277626  | 0.121786  |
| C | -4.332418 | 1.990003  | 0.488503  |
| C | -5.277467 | 3.002615  | 0.514374  |
| C | -4.935334 | 4.320959  | 0.175780  |
| C | -3.607096 | 4.599132  | -0.185697 |
| C | -2.650817 | 3.598443  | -0.204829 |
| H | -1.613309 | 3.818301  | -0.480731 |
| H | -3.328577 | 5.625102  | -0.454836 |
| C | -5.954682 | 5.411835  | 0.227690  |
| H | -6.310864 | 2.773905  | 0.800432  |
| H | -4.622078 | 0.970761  | 0.765098  |
| N | -0.321298 | 0.023009  | -1.821052 |
| C | 0.143020  | 1.012853  | -2.780714 |
| H | 1.250654  | 1.054971  | -2.847829 |
| H | -0.279413 | 0.802605  | -3.777937 |
| H | -0.234559 | 2.000328  | -2.460894 |
| S | -0.018095 | -1.588559 | -2.248166 |
| O | 1.303640  | -1.755930 | -2.842992 |
| O | -0.377035 | -2.357442 | -1.050549 |
| C | -1.236932 | -1.884965 | -3.503457 |
| H | -1.207156 | -2.972038 | -3.689643 |
| H | -0.958292 | -1.341431 | -4.420002 |
| H | -2.224542 | -1.569176 | -3.128355 |
| C | -3.069531 | -0.912626 | -0.479203 |
| H | -5.755343 | 6.191194  | -0.528644 |
| H | -6.976690 | 5.023733  | 0.074838  |
| H | -5.939735 | 5.910636  | 1.216909  |
| O | -3.664442 | -0.407167 | -1.400359 |
| C | -3.235576 | -2.322212 | -0.072903 |
| C | -2.902854 | -2.813826 | 1.194406  |
| C | -3.118589 | -4.153468 | 1.502292  |
| C | -3.664301 | -5.011246 | 0.548624  |
| C | -4.016320 | -4.524009 | -0.711384 |
| C | -3.812107 | -3.185158 | -1.016587 |
| H | -2.494860 | -2.148380 | 1.960576  |
| H | -2.862274 | -4.529804 | 2.498414  |
| H | -3.826220 | -6.067344 | 0.791752  |
| H | -4.457965 | -5.194270 | -1.456639 |
| H | -4.101860 | -2.784761 | -1.994306 |

## 6b1

71

scf done: -2192.476486

|   |           |           |           |
|---|-----------|-----------|-----------|
| C | -0.158240 | 0.978052  | 0.282943  |
| N | 1.023611  | 0.258663  | 0.434729  |
| C | 1.437398  | -0.145621 | -0.829812 |
| N | 0.631110  | 0.288823  | -1.761936 |
| C | -0.366936 | 0.988012  | -1.114606 |
| C | -0.714094 | 1.875432  | 1.310307  |
| C | 0.126544  | 2.454132  | 2.269711  |
| C | -0.380145 | 3.349152  | 3.206347  |
| C | -1.730986 | 3.689751  | 3.192613  |
| C | -2.572359 | 3.135126  | 2.229131  |

|    |           |           |           |
|----|-----------|-----------|-----------|
| C  | -2.069765 | 2.235709  | 1.295015  |
| C  | 1.534927  | -0.201293 | 1.718991  |
| O  | 0.776560  | -0.756591 | 2.468269  |
| C  | 2.960725  | 0.055199  | 1.969286  |
| C  | 3.581182  | -0.688613 | 2.983277  |
| C  | 4.940349  | -0.535927 | 3.221876  |
| C  | 5.681386  | 0.370393  | 2.460399  |
| C  | 5.061912  | 1.137318  | 1.472336  |
| C  | 3.702847  | 0.983632  | 1.224948  |
| N  | -1.159399 | 1.927992  | -1.789149 |
| C  | -2.074976 | 1.480912  | -2.828251 |
| S  | -0.349180 | 3.411132  | -2.067875 |
| O  | -1.374130 | 4.419189  | -2.268131 |
| O  | 0.642399  | 3.521138  | -1.005896 |
| C  | 0.516249  | 3.167352  | -3.604097 |
| C  | 2.617939  | -0.979197 | -1.070265 |
| C  | 2.934507  | -2.087984 | -0.276277 |
| C  | 4.103000  | -2.803835 | -0.508734 |
| C  | 4.983114  | -2.440036 | -1.535764 |
| C  | 4.637807  | -1.351219 | -2.347258 |
| C  | 3.470210  | -0.632467 | -2.125862 |
| C  | 6.264722  | -3.183076 | -1.749451 |
| H  | 1.200792  | 2.235414  | 2.273895  |
| H  | 0.293488  | 3.793423  | 3.946845  |
| H  | -2.128098 | 4.396830  | 3.929052  |
| H  | -3.633007 | 3.407737  | 2.201667  |
| H  | -2.742475 | 1.814092  | 0.536508  |
| H  | 2.981556  | -1.400361 | 3.561356  |
| H  | 5.429845  | -1.126474 | 4.003538  |
| H  | 6.755051  | 0.486994  | 2.645648  |
| H  | 5.643145  | 1.862240  | 0.893024  |
| H  | 3.214565  | 1.593004  | 0.454559  |
| H  | -2.531166 | 2.364641  | -3.305020 |
| H  | -1.569906 | 0.860074  | -3.596124 |
| H  | -2.892127 | 0.892023  | -2.370639 |
| H  | 1.109984  | 4.082173  | -3.769748 |
| H  | 1.169243  | 2.284726  | -3.499533 |
| H  | -0.213877 | 3.037648  | -4.419137 |
| H  | 2.256830  | -2.410385 | 0.524923  |
| H  | 5.305114  | -1.061474 | -3.168418 |
| H  | 3.217044  | 0.225691  | -2.759431 |
| H  | 7.088592  | -2.722275 | -1.169880 |
| H  | 6.186509  | -4.234328 | -1.420424 |
| H  | 6.570752  | -3.171657 | -2.810522 |
| H  | 4.338518  | -3.672410 | 0.118659  |
| Au | -1.800074 | -0.708407 | -0.169798 |
| C  | -3.129385 | -2.230664 | 0.154864  |
| N  | -3.135456 | -3.454808 | -0.410272 |
| C  | -4.180896 | -4.204627 | 0.088058  |
| C  | -4.836917 | -3.417404 | 0.981316  |
| N  | -4.173202 | -2.208517 | 1.009002  |
| C  | -2.147810 | -3.933515 | -1.361609 |
| C  | -4.555530 | -1.061655 | 1.816254  |
| H  | -4.365133 | -5.228791 | -0.235920 |
| H  | -5.715773 | -3.610803 | 1.596075  |
| H  | -1.936412 | -3.146499 | -2.102985 |
| H  | -2.547448 | -4.818928 | -1.879280 |
| H  | -1.212580 | -4.206426 | -0.843318 |
| H  | -5.313167 | -1.377168 | 2.549626  |
| H  | -4.978120 | -0.266148 | 1.178417  |
| H  | -3.674954 | -0.669754 | 2.351982  |

# TS<sub>6b2A</sub>

71

scf done: -2192.369348

|    |           |           |           |
|----|-----------|-----------|-----------|
| C  | -0.585716 | 0.529390  | -1.773853 |
| N  | -1.248657 | 0.459186  | -0.474270 |
| C  | -2.627560 | 0.562405  | -0.040485 |
| N  | -2.504754 | 0.740388  | 1.229264  |
| C  | -1.071614 | 0.714548  | 1.218454  |
| C  | -0.507190 | -0.516345 | 0.637639  |
| Au | 1.542321  | -0.779396 | 0.140907  |
| C  | 3.504929  | -1.042422 | -0.484805 |
| N  | 3.961646  | -1.974883 | -1.348654 |
| C  | 5.285512  | -1.740817 | -1.663542 |
| C  | 5.659664  | -0.632906 | -0.971225 |
| N  | 4.553110  | -0.222989 | -0.254382 |
| C  | 4.497593  | 0.944467  | 0.605156  |
| C  | 3.151180  | -3.044747 | -1.901076 |
| H  | 5.844826  | -2.387706 | -2.339249 |
| H  | 6.615198  | -0.111623 | -0.914665 |
| H  | 5.515193  | 1.344342  | 0.735676  |
| H  | 3.854048  | 1.722839  | 0.156285  |
| H  | 4.093649  | 0.662865  | 1.591921  |
| H  | 2.560489  | -3.514655 | -1.098224 |
| H  | 2.465109  | -2.653372 | -2.673197 |
| H  | 3.810957  | -3.801669 | -2.352883 |
| N  | -1.267650 | -1.691494 | 0.850110  |
| O  | -0.938958 | -0.209231 | -2.653853 |
| C  | 0.538196  | 1.476391  | -1.889287 |
| C  | 1.569858  | 1.155296  | -2.786226 |
| C  | 0.590864  | 2.673051  | -1.166334 |
| C  | 2.665930  | 1.998015  | -2.913446 |
| H  | 1.506357  | 0.221860  | -3.358256 |
| C  | 1.679065  | 3.528405  | -1.314905 |
| H  | -0.233721 | 2.951406  | -0.503083 |
| C  | 2.721618  | 3.184417  | -2.175482 |
| H  | 3.481044  | 1.737438  | -3.597728 |
| H  | 1.709108  | 4.471079  | -0.757237 |
| H  | 3.582347  | 3.854177  | -2.284716 |
| C  | -3.859402 | 0.427276  | -0.788719 |
| C  | -3.943011 | -0.130959 | -2.073628 |
| C  | -5.041858 | 0.835171  | -0.140607 |
| C  | -5.181818 | -0.270896 | -2.687553 |
| H  | -3.039833 | -0.474439 | -2.584974 |
| C  | -6.267302 | 0.693754  | -0.768094 |
| H  | -4.977299 | 1.270118  | 0.863221  |
| C  | -6.361229 | 0.142017  | -2.056222 |
| H  | -5.237620 | -0.718710 | -3.687184 |
| H  | -7.181124 | 1.016987  | -0.254752 |
| C  | -7.685056 | 0.023860  | -2.740278 |
| H  | -7.686322 | -0.784430 | -3.492155 |
| H  | -8.500454 | -0.163654 | -2.019378 |
| H  | -7.934829 | 0.963432  | -3.271418 |
| C  | -0.347876 | 1.824221  | 1.834162  |
| C  | -1.088800 | -2.797762 | -0.077235 |
| S  | -1.622925 | -2.087656 | 2.469043  |
| H  | -1.866928 | -3.559772 | 0.095737  |
| H  | -1.210872 | -2.411583 | -1.105405 |
| H  | -0.094348 | -3.277507 | 0.023406  |
| C  | -3.394633 | -2.095659 | 2.539982  |

|   |           |           |          |
|---|-----------|-----------|----------|
| O | -1.151481 | -3.446475 | 2.684949 |
| O | -1.112709 | -0.981254 | 3.272664 |
| H | -3.660821 | -2.412279 | 3.563028 |
| H | -3.750788 | -1.074306 | 2.329462 |
| H | -3.771269 | -2.826216 | 1.804921 |
| C | -0.989679 | 3.068450  | 1.946569 |
| C | -0.322594 | 4.151583  | 2.504095 |
| C | 0.977964  | 3.993005  | 2.987647 |
| C | 1.604403  | 2.748589  | 2.922853 |
| C | 0.946157  | 1.666404  | 2.348446 |
| H | -2.016706 | 3.179948  | 1.581152 |
| H | -0.822714 | 5.122965  | 2.577933 |
| H | 1.499824  | 4.844475  | 3.438661 |
| H | 2.609908  | 2.617817  | 3.337531 |
| H | 1.424769  | 0.679991  | 2.322666 |

# TS<sub>6b1B'</sub>

71

scf done: -2192.375942

|    |           |           |           |
|----|-----------|-----------|-----------|
| Au | -2.606031 | 0.196253  | 0.010922  |
| C  | -4.620052 | 0.170256  | -0.501271 |
| N  | -5.597930 | 0.996154  | -0.065051 |
| C  | -6.812836 | 0.654134  | -0.625564 |
| C  | -6.582932 | -0.413821 | -1.431591 |
| N  | -5.233313 | -0.692663 | -1.343968 |
| C  | -4.582960 | -1.795276 | -2.026086 |
| C  | -5.418512 | 2.105194  | 0.851440  |
| H  | -5.711894 | 3.051214  | 0.365681  |
| H  | -4.356387 | 2.159371  | 1.137923  |
| H  | -6.031732 | 1.955548  | 1.756223  |
| H  | -7.726794 | 1.206159  | -0.406248 |
| H  | -7.255292 | -0.995000 | -2.062696 |
| H  | -4.644285 | -2.720031 | -1.425462 |
| H  | -5.073322 | -1.963729 | -2.998371 |
| H  | -3.524064 | -1.543650 | -2.196168 |
| C  | -0.543598 | 0.317391  | 0.494971  |
| C  | 0.322090  | -0.834868 | 0.518990  |
| N  | 1.741354  | -0.498196 | 0.493899  |
| C  | 1.602156  | 0.389345  | -0.540775 |
| N  | 0.295616  | 0.413517  | -0.793918 |
| N  | -0.019463 | -2.135539 | 0.424585  |
| C  | 2.572301  | 1.162027  | -1.275531 |
| C  | 3.749304  | 1.667238  | -0.694400 |
| C  | 4.594335  | 2.473890  | -1.439866 |
| C  | 4.312206  | 2.782674  | -2.779333 |
| C  | 3.128927  | 2.284864  | -3.344691 |
| C  | 2.259942  | 1.498398  | -2.605463 |
| H  | 1.336872  | 1.111767  | -3.050158 |
| H  | 2.888529  | 2.526109  | -4.387057 |
| C  | 5.260499  | 3.606436  | -3.588531 |
| H  | 5.498364  | 2.882901  | -0.972895 |
| H  | 3.987341  | 1.466719  | 0.355368  |
| C  | -0.264218 | 1.442969  | 1.439085  |
| C  | 2.630722  | -0.912497 | 1.513630  |
| H  | 6.018619  | 2.961098  | -4.074508 |
| H  | 4.740693  | 4.156018  | -4.392547 |
| H  | 5.808215  | 4.331586  | -2.961413 |
| O  | 2.150069  | -1.293693 | 2.554678  |
| C  | 4.067335  | -0.937783 | 1.184345  |
| C  | 4.514350  | -1.293415 | -0.095747 |

|   |           |           |           |
|---|-----------|-----------|-----------|
| C | 5.880496  | -1.337711 | -0.356674 |
| C | 6.793273  | -1.008315 | 0.645530  |
| C | 6.347745  | -0.667147 | 1.924566  |
| C | 4.985700  | -0.650768 | 2.202204  |
| H | 3.791491  | -1.554809 | -0.878975 |
| H | 6.236299  | -1.626768 | -1.351382 |
| H | 7.867722  | -1.027493 | 0.431281  |
| H | 7.069792  | -0.420064 | 2.710170  |
| H | 4.615546  | -0.397800 | 3.202076  |
| S | 0.829793  | -3.247053 | -0.632296 |
| C | -1.274105 | -2.644158 | 0.978543  |
| O | 1.650415  | -2.451935 | -1.528356 |
| C | 1.860761  | -4.154941 | 0.486838  |
| O | -0.203015 | -4.130139 | -1.136407 |
| H | -1.103668 | -3.662040 | 1.369592  |
| H | -1.573697 | -1.995870 | 1.816819  |
| H | -2.077756 | -2.679495 | 0.222575  |
| H | 2.320004  | -4.956926 | -0.116493 |
| H | 2.634735  | -3.492753 | 0.907309  |
| H | 1.227877  | -4.587928 | 1.278338  |
| C | -0.270852 | 1.195978  | 2.817213  |
| C | -0.059026 | 2.236804  | 3.718049  |
| C | 0.157600  | 3.534724  | 3.254180  |
| C | 0.166430  | 3.783407  | 1.882200  |
| C | -0.041955 | 2.744080  | 0.976864  |
| H | -0.430229 | 0.172595  | 3.183963  |
| H | -0.056083 | 2.029633  | 4.794338  |
| H | 0.324503  | 4.352735  | 3.963898  |
| H | 0.339464  | 4.799628  | 1.509448  |
| H | -0.035418 | 2.938686  | -0.103609 |

## 6b2

71

scf done: -2192.486364

|    |           |           |           |
|----|-----------|-----------|-----------|
| N  | 0.533114  | 0.740386  | 1.824422  |
| C  | -0.381022 | 1.274266  | 1.004862  |
| C  | -0.196902 | 0.832915  | -0.355867 |
| N  | 1.052819  | 0.097469  | -0.248238 |
| C  | 1.377420  | 0.041278  | 1.066045  |
| C  | -1.384925 | 2.220373  | 1.487418  |
| C  | -1.187876 | 2.822449  | 2.738357  |
| C  | -2.096502 | 3.760454  | 3.217854  |
| C  | -3.213422 | 4.103829  | 2.457357  |
| C  | -3.423395 | 3.503412  | 1.213705  |
| C  | -2.516583 | 2.567642  | 0.729864  |
| Au | -1.772508 | -0.744252 | -0.226567 |
| N  | -0.371982 | 1.710569  | -1.448184 |
| C  | -0.913335 | 1.302698  | -2.743267 |
| S  | 0.711862  | 3.035425  | -1.503106 |
| O  | 1.357625  | 3.079387  | -0.192872 |
| O  | 1.507257  | 2.925096  | -2.717253 |
| C  | -0.356562 | 4.446259  | -1.638564 |
| C  | 2.474167  | -0.739825 | 1.625066  |
| C  | 3.141467  | -0.233915 | 2.749519  |
| C  | 4.239357  | -0.905586 | 3.268692  |
| C  | 4.690290  | -2.105229 | 2.700706  |
| C  | 3.986686  | -2.626541 | 1.606455  |
| C  | 2.893552  | -1.957824 | 1.072845  |
| C  | 5.898131  | -2.802791 | 3.241359  |
| C  | 1.684833  | -0.503337 | -1.396756 |

|   |           |           |           |
|---|-----------|-----------|-----------|
| C | 3.138458  | -0.313113 | -1.516813 |
| O | 0.993529  | -1.103471 | -2.182855 |
| C | 3.807196  | 0.760348  | -0.912024 |
| C | 5.189386  | 0.858564  | -1.025999 |
| C | 5.903126  | -0.106846 | -1.736841 |
| C | 5.235475  | -1.160843 | -2.364766 |
| C | 3.854092  | -1.257833 | -2.265784 |
| C | -3.205693 | -2.214963 | -0.206015 |
| N | -4.257166 | -2.293530 | 0.636953  |
| C | -5.028196 | -3.399065 | 0.340027  |
| C | -4.434234 | -4.018835 | -0.713099 |
| N | -3.315993 | -3.274962 | -1.033807 |
| C | -2.407952 | -3.603110 | -2.118057 |
| C | -4.542178 | -1.330252 | 1.686564  |
| H | -0.303038 | 2.547087  | 3.321042  |
| H | -1.930762 | 4.229688  | 4.193640  |
| H | -3.929575 | 4.841482  | 2.836369  |
| H | -4.306364 | 3.764828  | 0.620142  |
| H | -2.693178 | 2.092798  | -0.243606 |
| H | -1.801172 | 0.669701  | -2.568518 |
| H | -1.242648 | 2.194904  | -3.303804 |
| H | -0.186387 | 0.745726  | -3.360356 |
| H | 0.309551  | 5.324019  | -1.692159 |
| H | -0.955605 | 4.373807  | -2.560405 |
| H | -0.992001 | 4.487336  | -0.738313 |
| H | 2.797864  | 0.705622  | 3.195696  |
| H | 4.765195  | -0.493158 | 4.138597  |
| H | 4.301098  | -3.582880 | 1.170893  |
| H | 2.348151  | -2.407488 | 0.233801  |
| H | 5.867973  | -3.888056 | 3.040266  |
| H | 6.820813  | -2.410096 | 2.770588  |
| H | 6.002836  | -2.651090 | 4.330276  |
| H | 3.243111  | 1.535131  | -0.378266 |
| H | 5.715009  | 1.699141  | -0.560905 |
| H | 6.993700  | -0.031062 | -1.812914 |
| H | 5.799293  | -1.908628 | -2.932730 |
| H | 3.309913  | -2.079434 | -2.744976 |
| H | -5.925623 | -3.648372 | 0.906112  |
| H | -4.703263 | -4.922738 | -1.259227 |
| H | -2.031383 | -4.631988 | -1.993085 |
| H | -2.927645 | -3.521503 | -3.087656 |
| H | -1.558313 | -2.901244 | -2.101716 |
| H | -5.335619 | -1.732192 | 2.335187  |
| H | -3.637053 | -1.154574 | 2.290907  |
| H | -4.878502 | -0.372740 | 1.252377  |

## Cartesian coordinates of C-Series

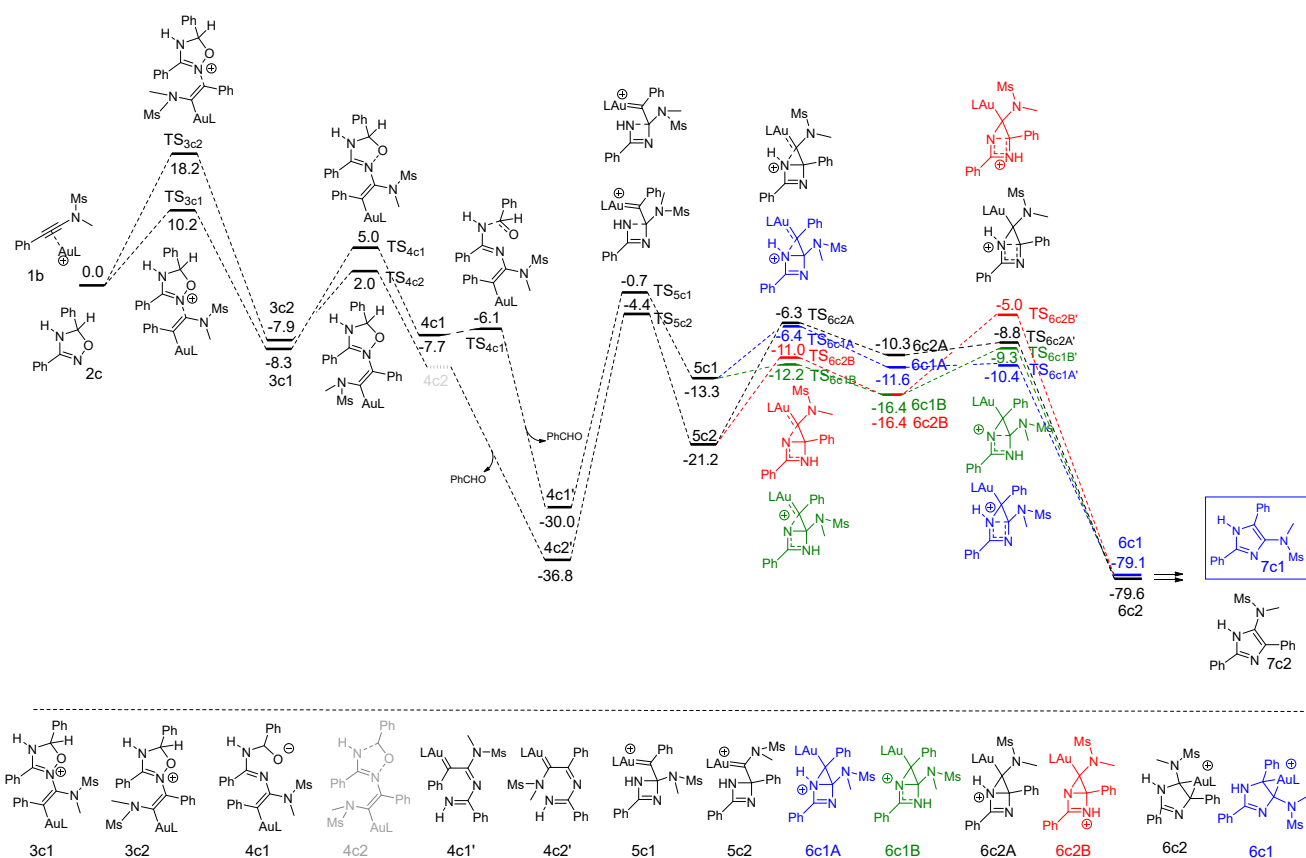

Figure S3. C-series reaction mechanism

41

scf done: -1429.958460

|    |           |           |           |
|----|-----------|-----------|-----------|
| C  | -1.695926 | 2.089645  | -0.034247 |
| N  | -2.571859 | 2.227485  | -1.054851 |
| C  | -3.215743 | 3.445743  | -0.978289 |
| C  | -2.729658 | 4.075845  | 0.122128  |
| N  | -1.798637 | 3.227403  | 0.686854  |
| C  | -2.776430 | 1.259880  | -2.117049 |
| C  | -1.070505 | 3.529812  | 1.904710  |
| Au | -0.482158 | 0.456421  | 0.324310  |
| C  | 0.661462  | -1.320253 | 0.714498  |
| C  | 1.690644  | -1.128030 | -0.014310 |
| C  | 0.196963  | -2.413218 | 1.560578  |
| N  | 2.626030  | -0.902472 | -0.866610 |
| S  | 2.385913  | -1.544326 | -2.530487 |
| C  | 3.901925  | -0.231976 | -0.584999 |
| O  | 3.725603  | -1.713102 | -3.051913 |
| O  | 1.443734  | -2.632251 | -2.383502 |
| C  | 1.593906  | -0.164449 | -3.313478 |
| C  | -0.848992 | -2.230134 | 2.476485  |
| C  | -1.273350 | -3.285313 | 3.278378  |
| C  | -0.668500 | -4.536163 | 3.162795  |
| C  | 0.364474  | -4.733008 | 2.243689  |
| C  | 0.798175  | -3.679267 | 1.449760  |
| H  | -3.963846 | 3.752060  | -1.709481 |
| H  | -2.967018 | 5.046052  | 0.558617  |
| H  | -2.637871 | 0.241773  | -1.719832 |
| H  | -3.804130 | 1.356445  | -2.501257 |
| H  | -2.065507 | 1.431090  | -2.944681 |
| H  | -1.766934 | 3.606367  | 2.756698  |
| H  | -0.349878 | 2.720420  | 2.098835  |
| H  | -0.526651 | 4.482484  | 1.792671  |
| H  | 4.022303  | 0.644103  | -1.245629 |
| H  | 3.889381  | 0.098642  | 0.464549  |
| H  | 4.736247  | -0.931415 | -0.751619 |
| H  | 1.385428  | -0.483838 | -4.349344 |
| H  | 0.655098  | 0.056643  | -2.776731 |
| H  | 2.287221  | 0.692353  | -3.310013 |
| H  | -1.326068 | -1.245615 | 2.560599  |
| H  | -2.086396 | -3.131917 | 3.996202  |
| H  | -1.007262 | -5.367890 | 3.790501  |
| H  | 0.834296  | -5.717712 | 2.146122  |
| H  | 1.599691  | -3.830390 | 0.715941  |

**2c**

29

scf done: -724.316851

|   |           |           |           |
|---|-----------|-----------|-----------|
| C | -1.774773 | -0.804305 | -0.711431 |
| C | -2.642757 | 0.152695  | -0.171436 |
| C | -4.021930 | -0.018799 | -0.268865 |
| C | -4.543349 | -1.144542 | -0.904194 |
| C | -3.681186 | -2.103103 | -1.441706 |
| C | -2.304525 | -1.935648 | -1.347798 |
| C | -0.323689 | -0.639883 | -0.606736 |
| N | 0.280177  | 0.558956  | -0.285060 |
| N | 0.510552  | -1.613389 | -0.746535 |
| O | 1.784323  | -1.068775 | -0.536013 |
| C | 1.697704  | 0.355543  | -0.540160 |
| C | 2.613501  | 0.934990  | 0.500422  |



|   |           |           |           |
|---|-----------|-----------|-----------|
| C | 2.451735  | 0.579385  | 1.843304  |
| C | 3.300110  | 1.104587  | 2.812416  |
| C | 4.316278  | 1.991807  | 2.446245  |
| C | 4.481706  | 2.347799  | 1.109766  |
| C | 3.631172  | 1.816609  | 0.138773  |
| H | -2.238947 | 1.028829  | 0.349459  |
| H | -4.694261 | 0.732660  | 0.159913  |
| H | -4.088458 | -2.988153 | -1.943283 |
| H | -1.618906 | -2.676622 | -1.773167 |
| H | 1.650927  | -0.117573 | 2.120304  |
| H | 3.171462  | 0.822991  | 3.863947  |
| H | 4.983260  | 2.406107  | 3.211223  |
| H | 5.278598  | 3.041713  | 0.818848  |
| H | 3.759871  | 2.090145  | -0.916538 |
| H | 1.984631  | 0.746994  | -1.547276 |
| H | -5.628393 | -1.277211 | -0.982318 |
| H | -0.142190 | 1.427019  | -0.607258 |

### TS<sub>3c1</sub>

68

scf done: -2310.706364

|    |           |           |           |
|----|-----------|-----------|-----------|
| N  | -3.709882 | 0.866883  | -1.158119 |
| C  | -2.886165 | 1.089986  | -0.098697 |
| C  | -3.418628 | -0.491783 | -1.618763 |
| O  | -2.159106 | -0.735599 | -1.011688 |
| N  | -1.977203 | 0.176381  | 0.034333  |
| C  | -2.949728 | 2.274193  | 0.755675  |
| C  | -2.633611 | 2.179436  | 2.117040  |
| C  | -2.660155 | 3.318255  | 2.915375  |
| C  | -2.993006 | 4.554305  | 2.357849  |
| C  | -3.305598 | 4.650806  | 1.001582  |
| C  | -3.290663 | 3.513137  | 0.199445  |
| C  | -4.465666 | -1.493665 | -1.188992 |
| C  | -4.216109 | -2.382395 | -0.142115 |
| C  | -5.205402 | -3.278123 | 0.262181  |
| C  | -6.445201 | -3.289203 | -0.376094 |
| C  | -6.694070 | -2.405506 | -1.427749 |
| C  | -5.704615 | -1.513816 | -1.836120 |
| C  | 0.131783  | 0.524718  | 0.224552  |
| C  | 0.642014  | -0.650915 | 0.423256  |
| C  | 0.008070  | -1.915293 | 0.795682  |
| C  | -0.843275 | -1.980263 | 1.909212  |
| C  | -1.438409 | -3.186252 | 2.271353  |
| C  | -1.212610 | -4.336369 | 1.514353  |
| C  | -0.369630 | -4.278969 | 0.403638  |
| C  | 0.253088  | -3.082797 | 0.058309  |
| Au | 2.761447  | -0.564635 | 0.141304  |
| N  | 0.242018  | 1.830634  | 0.156126  |
| C  | 0.643154  | 2.661886  | 1.297864  |
| S  | 0.105437  | 2.622225  | -1.401076 |
| O  | -0.841543 | 1.853487  | -2.187462 |
| O  | -0.114672 | 4.024678  | -1.095506 |
| C  | 1.733183  | 2.404253  | -2.067055 |
| P  | 5.090540  | -0.498074 | -0.218813 |
| H  | -2.382023 | 1.201342  | 2.544191  |
| H  | -2.422936 | 3.242366  | 3.982220  |
| H  | -3.560527 | 5.621939  | 0.563799  |
| H  | -3.512975 | 3.585087  | -0.871869 |
| H  | -3.234213 | -2.377065 | 0.346067  |
| H  | -5.001442 | -3.976649 | 1.082989  |

|   |           |           |           |
|---|-----------|-----------|-----------|
| H | -7.221321 | -3.994812 | -0.058060 |
| H | -7.663542 | -2.417890 | -1.938763 |
| H | -5.895486 | -0.828715 | -2.674035 |
| H | -1.024666 | -1.074618 | 2.499307  |
| H | -2.092282 | -3.226056 | 3.150436  |
| H | -1.689215 | -5.282641 | 1.795082  |
| H | -0.185555 | -5.178960 | -0.193924 |
| H | 0.928172  | -3.039685 | -0.805656 |
| H | 1.656746  | 3.074563  | 1.135156  |
| H | -0.077040 | 3.483541  | 1.447564  |
| H | 0.656445  | 2.015787  | 2.189796  |
| H | 2.462389  | 2.880157  | -1.390168 |
| H | 1.927933  | 1.323790  | -2.180221 |
| H | 1.731718  | 2.906021  | -3.049938 |
| H | -3.278745 | -0.514176 | -2.717871 |
| H | -3.011521 | 5.450658  | 2.987822  |
| C | 5.721436  | -1.862255 | -1.248023 |
| C | 5.625006  | 1.015578  | -1.082965 |
| C | 6.100199  | -0.551908 | 1.296385  |
| H | 5.120932  | 1.079592  | -2.063969 |
| H | 5.348855  | 1.903983  | -0.487488 |
| H | 6.720464  | 1.004161  | -1.236033 |
| H | 5.515804  | -2.828365 | -0.754682 |
| H | 5.215310  | -1.853853 | -2.229426 |
| H | 6.811803  | -1.752793 | -1.398314 |
| H | 5.896307  | -1.486465 | 1.848172  |
| H | 7.174979  | -0.506015 | 1.039207  |
| H | 5.843423  | 0.302910  | 1.946370  |
| H | -4.671485 | 1.204509  | -1.143559 |

### 3c1

68

scf done: -2310.741157

|    |           |           |           |
|----|-----------|-----------|-----------|
| N  | -3.614583 | 1.162842  | -0.660930 |
| C  | -2.559126 | 1.402161  | 0.100534  |
| C  | -3.438342 | -0.081954 | -1.416236 |
| O  | -2.153339 | -0.507111 | -0.958240 |
| N  | -1.670219 | 0.434853  | -0.047439 |
| C  | -2.372966 | 2.573794  | 0.947964  |
| C  | -1.907639 | 2.432830  | 2.260917  |
| C  | -1.727335 | 3.565256  | 3.046955  |
| C  | -1.991114 | 4.830214  | 2.518909  |
| C  | -2.444853 | 4.968497  | 1.206792  |
| C  | -2.647042 | 3.840871  | 0.417590  |
| C  | -4.482751 | -1.118594 | -1.119017 |
| C  | -4.413491 | -1.861344 | 0.063564  |
| C  | -5.398653 | -2.802790 | 0.346884  |
| C  | -6.456004 | -2.999135 | -0.543978 |
| C  | -6.523814 | -2.259630 | -1.723878 |
| C  | -5.532677 | -1.323040 | -2.014760 |
| C  | -0.238715 | 0.453082  | 0.102158  |
| C  | 0.432082  | -0.677486 | 0.400998  |
| C  | -0.302258 | -1.871454 | 0.857561  |
| C  | -1.039863 | -1.843270 | 2.051754  |
| C  | -1.731369 | -2.971073 | 2.492560  |
| C  | -1.712523 | -4.144175 | 1.739348  |
| C  | -0.980221 | -4.185280 | 0.551053  |
| C  | -0.269349 | -3.067556 | 0.123526  |
| Au | 2.510608  | -0.759399 | 0.167020  |
| N  | 0.319889  | 1.730054  | -0.119124 |

|   |           |           |           |
|---|-----------|-----------|-----------|
| C | 1.189560  | 2.377246  | 0.856911  |
| S | 0.292849  | 2.368039  | -1.675483 |
| O | -0.958631 | 1.931856  | -2.292613 |
| O | 0.593238  | 3.787684  | -1.551485 |
| C | 1.632085  | 1.576312  | -2.532631 |
| P | 4.858415  | -0.725361 | -0.204203 |
| H | -1.707266 | 1.434602  | 2.667406  |
| H | -1.377614 | 3.461346  | 4.079303  |
| H | -2.641331 | 5.963196  | 0.793691  |
| H | -2.980254 | 3.938625  | -0.622348 |
| H | -3.570217 | -1.718742 | 0.753708  |
| H | -5.338107 | -3.393097 | 1.268660  |
| H | -7.229937 | -3.741706 | -0.318940 |
| H | -7.347760 | -2.420051 | -2.427909 |
| H | -5.571432 | -0.749492 | -2.949624 |
| H | -1.051593 | -0.925008 | 2.653650  |
| H | -2.290930 | -2.930621 | 3.434768  |
| H | -2.259856 | -5.029971 | 2.081664  |
| H | -0.955489 | -5.104352 | -0.046043 |
| H | 0.314855  | -3.106681 | -0.805203 |
| H | 2.259254  | 2.338637  | 0.566168  |
| H | 0.888573  | 3.430657  | 0.998301  |
| H | 1.077190  | 1.838293  | 1.811581  |
| H | 2.577949  | 1.825921  | -2.021388 |
| H | 1.457042  | 0.487276  | -2.535657 |
| H | 1.629136  | 1.977082  | -3.560554 |
| H | -3.389870 | 0.141862  | -2.501610 |
| H | -1.839495 | 5.720792  | 3.138488  |
| C | 5.333516  | -1.007335 | -1.943344 |
| C | 5.576679  | 0.905871  | 0.190418  |
| C | 5.870620  | -1.912322 | 0.739936  |
| H | 5.070796  | 1.684874  | -0.409279 |
| H | 5.418682  | 1.133173  | 1.259957  |
| H | 6.660507  | 0.922243  | -0.030526 |
| H | 5.004711  | -2.012008 | -2.262964 |
| H | 4.841745  | -0.256909 | -2.588524 |
| H | 6.430284  | -0.926766 | -2.062933 |
| H | 5.564253  | -2.943558 | 0.490674  |
| H | 6.942200  | -1.781249 | 0.498641  |
| H | 5.718124  | -1.754044 | 1.822017  |
| H | -4.486366 | 1.688138  | -0.622775 |

### TS<sub>3c2</sub>

68

scf done: -2310.691220

|   |           |           |           |
|---|-----------|-----------|-----------|
| O | -2.793702 | -0.191362 | -1.503251 |
| C | -4.123277 | 0.319223  | -1.574983 |
| N | -4.066569 | 1.390767  | -0.577590 |
| C | -3.001155 | 1.109200  | 0.226848  |
| N | -2.231973 | 0.196063  | -0.278033 |
| C | -5.171160 | -0.720959 | -1.266340 |
| C | -2.719281 | 1.809550  | 1.478091  |
| C | -4.870112 | -1.848595 | -0.496965 |
| C | -5.873642 | -2.763244 | -0.182369 |
| C | -7.178039 | -2.557735 | -0.632359 |
| C | -7.479520 | -1.436645 | -1.405340 |
| C | -6.476376 | -0.523500 | -1.724792 |
| C | -3.193590 | 3.113788  | 1.668209  |
| C | -2.908490 | 3.790860  | 2.850518  |
| C | -2.154913 | 3.169720  | 3.845892  |

|    |           |           |           |
|----|-----------|-----------|-----------|
| C  | -1.684709 | 1.868442  | 3.660272  |
| C  | -1.964040 | 1.187095  | 2.480695  |
| C  | -0.142131 | -0.297128 | -0.117154 |
| C  | -0.337929 | -1.637201 | 0.387680  |
| C  | 0.596566  | 0.684099  | -0.497946 |
| C  | 0.098837  | -1.969793 | 1.682241  |
| C  | -0.051248 | -3.268583 | 2.160280  |
| C  | -0.658741 | -4.240014 | 1.364409  |
| C  | -1.107720 | -3.913821 | 0.082825  |
| C  | -0.941847 | -2.623893 | -0.409139 |
| Au | 2.519888  | -0.340408 | -0.182739 |
| N  | 0.485933  | 1.939114  | -1.012380 |
| S  | 1.840912  | 2.983344  | -1.029484 |
| C  | -0.741190 | 2.454164  | -1.624002 |
| O  | 1.297088  | 4.330008  | -1.094238 |
| O  | 2.720616  | 2.595960  | 0.066084  |
| C  | 2.645634  | 2.614779  | -2.567169 |
| P  | 4.568907  | -1.430119 | 0.120672  |
| H  | -3.842841 | -2.019448 | -0.152460 |
| H  | -5.633206 | -3.648514 | 0.417348  |
| H  | -7.963886 | -3.280476 | -0.384938 |
| H  | -8.500533 | -1.277112 | -1.769896 |
| H  | -6.707310 | 0.353436  | -2.344594 |
| H  | -3.770503 | 3.608759  | 0.878000  |
| H  | -3.275022 | 4.812964  | 2.993667  |
| H  | -1.100594 | 1.377922  | 4.446438  |
| H  | -1.618756 | 0.156762  | 2.336046  |
| H  | 0.570275  | -1.197800 | 2.303818  |
| H  | 0.300207  | -3.521515 | 3.166689  |
| H  | -0.783830 | -5.259771 | 1.745324  |
| H  | -1.583407 | -4.677200 | -0.542944 |
| H  | -1.290502 | -2.358948 | -1.413575 |
| H  | -1.313531 | 1.607039  | -2.032828 |
| H  | -1.357539 | 3.014696  | -0.897855 |
| H  | -0.484284 | 3.133744  | -2.453231 |
| H  | 3.514381  | 3.290923  | -2.635875 |
| H  | 2.973343  | 1.561661  | -2.556942 |
| H  | 1.939460  | 2.810034  | -3.390552 |
| H  | -1.933569 | 3.703289  | 4.776908  |
| H  | -4.274254 | 0.733335  | -2.590049 |
| C  | 5.953748  | -0.303944 | 0.478149  |
| C  | 4.529831  | -2.601816 | 1.514292  |
| C  | 5.117255  | -2.417135 | -1.307132 |
| H  | 5.231265  | -1.765110 | -2.190700 |
| H  | 6.085370  | -2.903319 | -1.083386 |
| H  | 4.362863  | -3.190554 | -1.534973 |
| H  | 3.746239  | -3.359883 | 1.336180  |
| H  | 5.509266  | -3.104169 | 1.622528  |
| H  | 4.289914  | -2.060777 | 2.446760  |
| H  | 5.731322  | 0.282971  | 1.386777  |
| H  | 6.885112  | -0.880471 | 0.631945  |
| H  | 6.091631  | 0.395140  | -0.365557 |
| H  | -4.936736 | 1.732955  | -0.171017 |

**3c2**

68

scf done: -2310.738434

|   |           |           |           |
|---|-----------|-----------|-----------|
| O | -2.865322 | -0.317884 | -1.366030 |
| C | -4.089064 | 0.421715  | -1.241560 |
| N | -3.720212 | 1.409309  | -0.220598 |

|    |           |           |           |
|----|-----------|-----------|-----------|
| C  | -2.534320 | 1.117513  | 0.305848  |
| N  | -1.993079 | 0.103437  | -0.336970 |
| C  | -5.241792 | -0.453317 | -0.845733 |
| C  | -1.897330 | 1.838509  | 1.402519  |
| C  | -5.109926 | -1.348350 | 0.222340  |
| C  | -6.185879 | -2.147629 | 0.593920  |
| C  | -7.396662 | -2.054869 | -0.096809 |
| C  | -7.528905 | -1.167102 | -1.162409 |
| C  | -6.449170 | -0.368683 | -1.539222 |
| C  | -1.898538 | 3.238767  | 1.385717  |
| C  | -1.272917 | 3.934203  | 2.415524  |
| C  | -0.670534 | 3.237223  | 3.461939  |
| C  | -0.680840 | 1.840992  | 3.481526  |
| C  | -1.285979 | 1.135090  | 2.448802  |
| C  | -0.672559 | -0.430667 | -0.283016 |
| C  | -0.598680 | -1.815171 | 0.253312  |
| C  | 0.390878  | 0.371491  | -0.587942 |
| C  | 0.244245  | -2.128099 | 1.333233  |
| C  | 0.312436  | -3.425690 | 1.835617  |
| C  | -0.476857 | -4.434475 | 1.282528  |
| C  | -1.337522 | -4.132384 | 0.228591  |
| C  | -1.397879 | -2.836437 | -0.282578 |
| Au | 2.348246  | -0.384263 | -0.335105 |
| N  | 0.171001  | 1.645502  | -1.124647 |
| S  | 1.234536  | 2.908701  | -0.739926 |
| C  | -0.821302 | 1.954774  | -2.154036 |
| O  | 0.474075  | 4.135202  | -0.950952 |
| O  | 1.820715  | 2.628561  | 0.564252  |
| C  | 2.517642  | 2.837966  | -1.967278 |
| P  | 4.490519  | -1.363101 | -0.071242 |
| H  | -4.155987 | -1.432258 | 0.760075  |
| H  | -6.081173 | -2.851478 | 1.426849  |
| H  | -8.242697 | -2.685952 | 0.197674  |
| H  | -8.475957 | -1.098789 | -1.708747 |
| H  | -6.543554 | 0.325603  | -2.383736 |
| H  | -2.358623 | 3.782286  | 0.551745  |
| H  | -1.253974 | 5.028719  | 2.397943  |
| H  | -0.213770 | 1.298443  | 4.310035  |
| H  | -1.306302 | 0.039166  | 2.459164  |
| H  | 0.843936  | -1.333394 | 1.797205  |
| H  | 0.977482  | -3.645719 | 2.679164  |
| H  | -0.426975 | -5.454634 | 1.679866  |
| H  | -1.965010 | -4.916511 | -0.210611 |
| H  | -2.068055 | -2.614503 | -1.121092 |
| H  | -1.165874 | 1.009835  | -2.603098 |
| H  | -1.688734 | 2.523446  | -1.769149 |
| H  | -0.363472 | 2.560365  | -2.956312 |
| H  | 3.208245  | 3.668215  | -1.743975 |
| H  | 3.036285  | 1.866646  | -1.885638 |
| H  | 2.066927  | 2.973207  | -2.963845 |
| H  | -0.183965 | 3.788709  | 4.273861  |
| H  | -4.291015 | 0.923815  | -2.207839 |
| C  | 5.847943  | -0.203270 | 0.301012  |
| C  | 4.520581  | -2.563770 | 1.302402  |
| C  | 5.087295  | -2.312996 | -1.509284 |
| H  | 5.175628  | -1.647702 | -2.386173 |
| H  | 6.074133  | -2.762960 | -1.291066 |
| H  | 4.365521  | -3.113863 | -1.748965 |
| H  | 3.767773  | -3.351290 | 1.116629  |
| H  | 5.520713  | -3.026499 | 1.397883  |
| H  | 4.262685  | -2.051585 | 2.246883  |

|   |           |           |           |
|---|-----------|-----------|-----------|
| H | 5.613264  | 0.360678  | 1.221134  |
| H | 6.798202  | -0.752140 | 0.440628  |
| H | 5.960924  | 0.515739  | -0.529926 |
| H | -4.394267 | 2.031717  | 0.221796  |

# TS<sub>4c1</sub>

68

scf done: -2310.719099

|    |           |           |           |
|----|-----------|-----------|-----------|
| O  | -3.032147 | -0.103258 | -1.884266 |
| C  | -4.112264 | 0.266022  | -1.207039 |
| N  | -3.612559 | 1.189061  | -0.105507 |
| C  | -2.392915 | 0.937056  | 0.312926  |
| N  | -1.741637 | -0.062757 | -0.290738 |
| C  | -4.898748 | -0.861930 | -0.552505 |
| C  | -1.806541 | 1.692230  | 1.433416  |
| C  | -4.413775 | -2.167601 | -0.626714 |
| C  | -5.111640 | -3.212162 | -0.020779 |
| C  | -6.304073 | -2.956020 | 0.655734  |
| C  | -6.801154 | -1.653067 | 0.718469  |
| C  | -6.101158 | -0.611032 | 0.113594  |
| C  | -2.154990 | 3.041711  | 1.595052  |
| C  | -1.554991 | 3.795142  | 2.598055  |
| C  | -0.619037 | 3.205576  | 3.447662  |
| C  | -0.283138 | 1.859828  | 3.295173  |
| C  | -0.868683 | 1.099294  | 2.288358  |
| C  | -0.494995 | -0.247753 | -0.666516 |
| N  | -0.108235 | -1.592801 | -0.887857 |
| C  | 0.458054  | 0.792963  | -0.815699 |
| Au | 2.394144  | 0.161049  | -0.304928 |
| C  | 0.091688  | 2.133146  | -1.161610 |
| P  | 4.399713  | -0.964347 | 0.292566  |
| H  | -3.483620 | -2.343217 | -1.180168 |
| H  | -4.723651 | -4.236469 | -0.081536 |
| H  | -6.854895 | -3.776620 | 1.129650  |
| H  | -7.744236 | -1.449259 | 1.238491  |
| H  | -6.502335 | 0.411328  | 0.155639  |
| H  | -2.858036 | 3.522686  | 0.904900  |
| H  | -1.812744 | 4.853688  | 2.708382  |
| H  | 0.442785  | 1.394565  | 3.970515  |
| H  | -0.600300 | 0.043442  | 2.169676  |
| H  | -0.146412 | 3.801439  | 4.236205  |
| H  | -4.808798 | 0.901781  | -1.810190 |
| C  | 4.251096  | -1.741446 | 1.935027  |
| C  | 4.684405  | -2.372023 | -0.830924 |
| C  | 5.972499  | -0.045861 | 0.337424  |
| H  | 5.899574  | 0.785317  | 1.060767  |
| H  | 6.798108  | -0.718039 | 0.637380  |
| H  | 6.189075  | 0.375080  | -0.660112 |
| H  | 4.835822  | -2.008614 | -1.862904 |
| H  | 5.571745  | -2.950509 | -0.511788 |
| H  | 3.787826  | -3.020063 | -0.806091 |
| H  | 3.349813  | -2.380839 | 1.940995  |
| H  | 5.143610  | -2.357846 | 2.152251  |
| H  | 4.140625  | -0.966811 | 2.714216  |
| H  | -4.231753 | 1.780483  | 0.449988  |
| C  | 0.348930  | -1.969767 | -2.221723 |
| S  | 0.261131  | -2.611289 | 0.396867  |
| H  | 0.181086  | -3.047774 | -2.389228 |
| H  | -0.260315 | -1.416504 | -2.957383 |
| H  | 1.422586  | -1.748054 | -2.385022 |

|   |           |           |           |
|---|-----------|-----------|-----------|
| C | -1.124686 | -3.709598 | 0.481364  |
| O | 1.449769  | -3.376556 | 0.027965  |
| O | 0.270875  | -1.807144 | 1.617121  |
| H | -0.916202 | -4.436893 | 1.283651  |
| H | -2.014024 | -3.101015 | 0.717145  |
| H | -1.237207 | -4.222428 | -0.488292 |
| C | -1.048715 | 2.424162  | -1.955580 |
| C | -1.357539 | 3.737516  | -2.278914 |
| C | -0.562848 | 4.784134  | -1.801963 |
| C | 0.565810  | 4.518989  | -1.018624 |
| C | 0.904468  | 3.208829  | -0.723838 |
| H | -1.680054 | 1.602766  | -2.320365 |
| H | -2.226647 | 3.954220  | -2.909340 |
| H | -0.818363 | 5.819604  | -2.053596 |
| H | 1.187611  | 5.343384  | -0.654385 |
| H | 1.796796  | 2.985245  | -0.125334 |

# 4c1

68

scf done: -2310.735894

|    |           |           |           |
|----|-----------|-----------|-----------|
| N  | -1.533063 | 2.272030  | -0.071148 |
| C  | -2.243158 | 1.202084  | -0.326701 |
| C  | -0.076065 | 2.384212  | 0.533043  |
| O  | 0.282318  | 1.334907  | 1.208099  |
| N  | -1.759223 | -0.035936 | -0.242943 |
| C  | -3.606919 | 1.343280  | -0.885816 |
| C  | -4.082716 | 0.395971  | -1.800077 |
| C  | -5.357469 | 0.529524  | -2.342590 |
| C  | -6.170633 | 1.596773  | -1.962111 |
| C  | -5.707839 | 2.531483  | -1.035152 |
| C  | -4.430183 | 2.408250  | -0.499204 |
| C  | 0.819199  | 2.745390  | -0.649739 |
| C  | 0.879018  | 1.938414  | -1.793512 |
| C  | 1.763775  | 2.237588  | -2.827261 |
| C  | 2.610779  | 3.345148  | -2.727878 |
| C  | 2.562614  | 4.150027  | -1.591392 |
| C  | 1.665837  | 3.851245  | -0.562526 |
| C  | -1.166422 | -0.826732 | 0.572225  |
| C  | -0.141009 | -1.603686 | -0.141953 |
| C  | -0.534291 | -2.686006 | -0.960691 |
| C  | -1.869479 | -3.184783 | -0.957733 |
| C  | -2.213128 | -4.263619 | -1.748479 |
| C  | -1.241719 | -4.864760 | -2.561104 |
| C  | 0.077229  | -4.397688 | -2.583059 |
| C  | 0.430822  | -3.322886 | -1.788444 |
| Au | 1.762729  | -0.759980 | 0.080111  |
| N  | -1.354929 | -1.055566 | 1.899516  |
| C  | -0.499840 | -2.023184 | 2.584143  |
| S  | -2.380010 | -0.092855 | 2.935573  |
| O  | -3.252841 | 0.678131  | 2.065058  |
| O  | -2.949517 | -1.040129 | 3.878419  |
| C  | -1.220957 | 0.967891  | 3.736889  |
| P  | 3.946989  | 0.116111  | 0.401868  |
| H  | -3.436755 | -0.438232 | -2.096014 |
| H  | -5.719562 | -0.206155 | -3.069039 |
| H  | -6.351916 | 3.359110  | -0.718964 |
| H  | -4.087838 | 3.124449  | 0.257254  |
| H  | 0.207467  | 1.073322  | -1.885158 |
| H  | 1.790933  | 1.605593  | -3.723114 |
| H  | 3.305508  | 3.581565  | -3.542365 |

|   |           |           |           |
|---|-----------|-----------|-----------|
| H | 3.220519  | 5.023049  | -1.507397 |
| H | 1.621396  | 4.491629  | 0.329393  |
| H | -2.625158 | -2.712864 | -0.318745 |
| H | -3.236713 | -4.650542 | -1.741413 |
| H | -1.520662 | -5.719443 | -3.187468 |
| H | 0.820938  | -4.883405 | -3.221958 |
| H | 1.458381  | -2.939626 | -1.778884 |
| H | 0.492294  | -1.588916 | 2.814834  |
| H | -0.998114 | -2.343512 | 3.511986  |
| H | -0.366894 | -2.920026 | 1.954572  |
| H | -0.676157 | 0.374418  | 4.489632  |
| H | -0.551114 | 1.352519  | 2.928733  |
| H | -1.820425 | 1.756069  | 4.224018  |
| H | -0.216197 | 3.327392  | 1.138583  |
| H | -7.176254 | 1.697555  | -2.385349 |
| C | 4.781120  | 0.681223  | -1.115546 |
| C | 3.942894  | 1.576673  | 1.490074  |
| C | 5.127952  | -1.039638 | 1.174365  |
| H | 3.293439  | 2.352687  | 1.044561  |
| H | 3.527029  | 1.303115  | 2.476012  |
| H | 4.969070  | 1.970232  | 1.615589  |
| H | 4.876308  | -0.158126 | -1.827111 |
| H | 4.179505  | 1.480043  | -1.588020 |
| H | 5.787146  | 1.072939  | -0.874238 |
| H | 5.261431  | -1.924215 | 0.526806  |
| H | 6.106322  | -0.545696 | 1.324654  |
| H | 4.735723  | -1.375358 | 2.150671  |
| H | -1.955596 | 3.162739  | -0.337204 |

# TS<sub>4c2</sub>

68

scf done: -2310.723312

|    |           |           |           |
|----|-----------|-----------|-----------|
| O  | 3.155485  | 0.196833  | -1.726900 |
| C  | 4.228593  | -0.488286 | -1.265866 |
| N  | 3.657236  | -1.440422 | -0.250063 |
| C  | 2.496543  | -1.033077 | 0.229822  |
| N  | 1.960471  | 0.024913  | -0.344075 |
| C  | 5.304033  | 0.346825  | -0.597659 |
| C  | 1.821732  | -1.718258 | 1.344375  |
| C  | 5.024042  | 1.638114  | -0.146487 |
| C  | 6.011360  | 2.378584  | 0.502346  |
| C  | 7.280879  | 1.835291  | 0.699775  |
| C  | 7.565745  | 0.548086  | 0.242588  |
| C  | 6.579011  | -0.191594 | -0.406476 |
| C  | 1.853629  | -3.117178 | 1.408322  |
| C  | 1.173862  | -3.775332 | 2.429550  |
| C  | 0.481325  | -3.042910 | 3.392132  |
| C  | 0.460173  | -1.647897 | 3.334644  |
| C  | 1.121069  | -0.982431 | 2.309019  |
| C  | 0.724327  | 0.503608  | -0.475736 |
| C  | 0.573090  | 1.965377  | -0.223249 |
| C  | -0.365437 | -0.366103 | -0.744744 |
| C  | -0.194594 | 2.482572  | 0.830238  |
| C  | -0.283751 | 3.859488  | 1.029722  |
| C  | 0.398167  | 4.737037  | 0.186511  |
| C  | 1.180693  | 4.231239  | -0.850401 |
| C  | 1.270476  | 2.854724  | -1.052065 |
| Au | -2.297264 | 0.315529  | -0.187967 |
| N  | -0.160715 | -1.573919 | -1.301674 |
| S  | -1.314446 | -2.865608 | -1.006340 |



|   |           |           |           |
|---|-----------|-----------|-----------|
| C | 0.921085  | -1.952402 | -2.221606 |
| O | -0.575336 | -4.085612 | -1.284600 |
| O | -1.890301 | -2.641794 | 0.309336  |
| C | -2.539149 | -2.626944 | -2.265014 |
| P | -4.413460 | 1.216230  | 0.373052  |
| H | 4.027978  | 2.063015  | -0.318798 |
| H | 5.789163  | 3.393045  | 0.853203  |
| H | 8.056225  | 2.421181  | 1.206707  |
| H | 8.564991  | 0.121311  | 0.386042  |
| H | 6.803857  | -1.201298 | -0.778044 |
| H | 2.383778  | -3.696912 | 0.643252  |
| H | 1.183251  | -4.869471 | 2.468690  |
| H | -0.073784 | -1.073758 | 4.099164  |
| H | 1.115247  | 0.112556  | 2.263613  |
| H | -0.712813 | 1.802652  | 1.520428  |
| H | -0.879890 | 4.249774  | 1.862832  |
| H | 0.326576  | 5.818997  | 0.345416  |
| H | 1.725828  | 4.914153  | -1.511908 |
| H | 1.888955  | 2.450690  | -1.862979 |
| H | 1.499503  | -1.056047 | -2.490853 |
| H | 1.594930  | -2.702591 | -1.776109 |
| H | 0.479582  | -2.388450 | -3.135165 |
| H | -3.262692 | -3.450770 | -2.143175 |
| H | -3.028504 | -1.649701 | -2.114100 |
| H | -2.045608 | -2.690622 | -3.248357 |
| H | -0.049483 | -3.563663 | 4.196517  |
| H | 4.684078  | -1.120436 | -2.063581 |
| C | -5.741716 | -0.008414 | 0.609260  |
| C | -4.373262 | 2.166409  | 1.928089  |
| C | -5.071997 | 2.383866  | -0.861219 |
| H | -5.199996 | 1.870555  | -1.830564 |
| H | -6.047435 | 2.785027  | -0.527982 |
| H | -4.360481 | 3.217486  | -0.997950 |
| H | -3.637878 | 2.986150  | 1.839346  |
| H | -5.370642 | 2.591096  | 2.148477  |
| H | -4.065228 | 1.506916  | 2.758906  |
| H | -5.457999 | -0.715738 | 1.408295  |
| H | -6.685081 | 0.498165  | 0.886209  |
| H | -5.894111 | -0.577613 | -0.324784 |
| H | 4.247298  | -2.078009 | 0.285091  |

#### 4c2'

54

scf done: -1965.693535

|    |           |           |           |
|----|-----------|-----------|-----------|
| N  | -1.080458 | -0.158991 | 1.759148  |
| C  | -0.772250 | -0.901766 | 0.768089  |
| C  | -0.259459 | -0.270420 | -0.481611 |
| N  | 0.092226  | 1.822248  | 1.896138  |
| C  | -1.024709 | 1.238779  | 1.676079  |
| C  | -0.756319 | -2.372818 | 0.852409  |
| C  | -1.294931 | -3.006602 | 1.978859  |
| C  | -1.303352 | -4.393755 | 2.059434  |
| C  | -0.771002 | -5.160841 | 1.019931  |
| C  | -0.227078 | -4.536816 | -0.101553 |
| C  | -0.219386 | -3.146173 | -0.185653 |
| Au | 1.787018  | 0.231884  | -0.265561 |
| N  | -1.019904 | 0.017855  | -1.488993 |
| C  | -0.586668 | 0.810477  | -2.644845 |
| S  | -2.807379 | -0.438759 | -1.602185 |
| O  | -3.170130 | -0.992418 | -0.314032 |

|   |           |           |           |
|---|-----------|-----------|-----------|
| O | -3.445152 | 0.739420  | -2.151075 |
| C | -2.742996 | -1.746422 | -2.795458 |
| C | -2.315383 | 1.900330  | 1.352575  |
| C | -3.536877 | 1.305744  | 1.694425  |
| C | -4.736480 | 1.938993  | 1.382115  |
| C | -4.729474 | 3.161315  | 0.710228  |
| C | -3.517629 | 3.752785  | 0.351672  |
| C | -2.317087 | 3.126406  | 0.672213  |
| P | 4.062921  | 0.755997  | 0.098798  |
| H | -1.711499 | -2.390913 | 2.783523  |
| H | -1.730587 | -4.886048 | 2.939938  |
| H | -0.778831 | -6.254444 | 1.087169  |
| H | 0.199237  | -5.135184 | -0.913861 |
| H | 0.230255  | -2.663926 | -1.064953 |
| H | 0.502817  | 0.951977  | -2.578627 |
| H | -0.830911 | 0.288682  | -3.584672 |
| H | -1.100867 | 1.785301  | -2.625602 |
| H | -3.789082 | -2.084399 | -2.896077 |
| H | -2.373483 | -1.364566 | -3.759266 |
| H | -2.114348 | -2.556307 | -2.389145 |
| H | -3.539032 | 0.341355  | 2.213166  |
| H | -5.687137 | 1.472510  | 1.663627  |
| H | -3.507987 | 4.705719  | -0.188908 |
| H | -1.368492 | 3.587283  | 0.368381  |
| H | -0.024071 | 2.841646  | 1.878444  |
| H | -5.675333 | 3.654409  | 0.458866  |
| C | 4.325962  | 1.535753  | 1.723006  |
| C | 5.169651  | -0.689937 | 0.075447  |
| C | 4.782047  | 1.913562  | -1.108924 |
| H | 5.839341  | 2.118693  | -0.856985 |
| H | 4.727319  | 1.476707  | -2.121492 |
| H | 4.215245  | 2.861016  | -1.101678 |
| H | 6.212170  | -0.375544 | 0.269693  |
| H | 4.855054  | -1.412039 | 0.849135  |
| H | 5.115458  | -1.183229 | -0.910980 |
| H | 5.397491  | 1.762617  | 1.876211  |
| H | 3.739564  | 2.469834  | 1.783083  |
| H | 3.977284  | 0.854855  | 2.519500  |

# **TS<sub>4c1'</sub>**

68

scf done: -2310.732662

|   |           |          |           |
|---|-----------|----------|-----------|
| N | -1.593680 | 2.306218 | 0.278342  |
| C | -2.227970 | 1.252616 | -0.117647 |
| C | 0.223189  | 2.473457 | 0.781048  |
| O | 0.635798  | 1.395761 | 1.263954  |
| N | -1.607876 | 0.049324 | -0.216210 |
| C | -3.614790 | 1.302459 | -0.644729 |
| C | -4.020599 | 0.406424 | -1.640167 |
| C | -5.313600 | 0.469737 | -2.153860 |
| C | -6.214034 | 1.415605 | -1.665383 |
| C | -5.819188 | 2.299736 | -0.660129 |
| C | -4.525374 | 2.245536 | -0.152802 |
| C | 0.768765  | 2.986826 | -0.526003 |
| C | 0.896961  | 2.149520 | -1.640945 |
| C | 1.464053  | 2.627438 | -2.817955 |
| C | 1.923094  | 3.946253 | -2.890217 |
| C | 1.796690  | 4.785585 | -1.785759 |
| C | 1.213406  | 4.306851 | -0.610209 |

|    |           |           |           |
|----|-----------|-----------|-----------|
| C  | -1.060549 | -0.829008 | 0.523944  |
| C  | -0.080948 | -1.609548 | -0.266537 |
| C  | -0.556415 | -2.621407 | -1.130775 |
| C  | -1.913897 | -3.054345 | -1.106159 |
| C  | -2.336927 | -4.070407 | -1.940580 |
| C  | -1.424667 | -4.670564 | -2.819825 |
| C  | -0.085832 | -4.266210 | -2.865328 |
| C  | 0.347012  | -3.255519 | -2.026864 |
| Au | 1.861911  | -0.888421 | -0.044038 |
| N  | -1.202342 | -1.146813 | 1.851190  |
| C  | -0.311771 | -2.140312 | 2.449152  |
| S  | -2.255992 | -0.315300 | 2.950698  |
| O  | -3.254431 | 0.362842  | 2.140892  |
| O  | -2.670933 | -1.316649 | 3.918042  |
| C  | -1.171930 | 0.849869  | 3.719501  |
| P  | 3.977109  | 0.089237  | 0.433926  |
| H  | -3.306789 | -0.332144 | -2.022600 |
| H  | -5.620370 | -0.225979 | -2.942771 |
| H  | -6.529495 | 3.032258  | -0.261327 |
| H  | -4.231616 | 2.919518  | 0.660886  |
| H  | 0.528316  | 1.116278  | -1.582110 |
| H  | 1.550199  | 1.969160  | -3.690533 |
| H  | 2.375581  | 4.320120  | -3.815998 |
| H  | 2.151541  | 5.821386  | -1.838161 |
| H  | 1.108919  | 4.967589  | 0.260899  |
| H  | -2.623470 | -2.582656 | -0.415896 |
| H  | -3.377557 | -4.408038 | -1.917038 |
| H  | -1.766749 | -5.474319 | -3.481314 |
| H  | 0.610496  | -4.749479 | -3.557280 |
| H  | 1.391458  | -2.921400 | -2.036542 |
| H  | 0.677816  | -1.702777 | 2.685925  |
| H  | -0.779379 | -2.529937 | 3.365951  |
| H  | -0.177958 | -2.992848 | 1.760337  |
| H  | -0.560451 | 0.297539  | 4.452318  |
| H  | -0.533124 | 1.295882  | 2.928422  |
| H  | -1.815855 | 1.586996  | 4.228207  |
| H  | -0.020672 | 3.321868  | 1.474735  |
| H  | -7.233175 | 1.460940  | -2.065520 |
| C  | 4.308999  | 1.606701  | -0.518962 |
| C  | 3.990384  | 0.642615  | 2.170248  |
| C  | 5.475863  | -0.928434 | 0.239394  |
| H  | 3.109466  | 1.291052  | 2.330071  |
| H  | 3.911334  | -0.230859 | 2.841954  |
| H  | 4.918608  | 1.199171  | 2.398503  |
| H  | 4.385459  | 1.369852  | -1.595172 |
| H  | 3.470314  | 2.314164  | -0.376166 |
| H  | 5.252157  | 2.072489  | -0.176362 |
| H  | 5.589609  | -1.227488 | -0.817485 |
| H  | 6.369449  | -0.358217 | 0.555043  |
| H  | 5.389710  | -1.840634 | 0.855641  |
| H  | -2.101232 | 3.186474  | 0.161213  |

**4c1'**

54

scf done: -1965.682154

|   |           |           |           |
|---|-----------|-----------|-----------|
| N | -1.957423 | 3.202235  | 1.558996  |
| C | -1.192938 | 2.190459  | 1.709293  |
| N | -1.654198 | 0.894207  | 1.958070  |
| C | -1.664738 | -0.051349 | 1.092648  |
| C | -1.109104 | 0.187653  | -0.251462 |

|    |           |           |           |
|----|-----------|-----------|-----------|
| N  | -2.026803 | -1.323297 | 1.492870  |
| S  | -2.265793 | -2.553455 | 0.351254  |
| C  | -2.206083 | -1.621705 | 2.906766  |
| O  | -2.054372 | -1.896237 | -0.942013 |
| O  | -1.464949 | -3.701120 | 0.736365  |
| C  | -3.980853 | -2.958397 | 0.510681  |
| C  | 0.285510  | 2.357004  | 1.686657  |
| C  | 0.842161  | 3.430521  | 0.980540  |
| C  | 2.223101  | 3.596090  | 0.927781  |
| C  | 3.061730  | 2.706298  | 1.602532  |
| C  | 2.514256  | 1.640651  | 2.317028  |
| C  | 1.132633  | 1.458236  | 2.348360  |
| C  | -1.813536 | 1.032232  | -1.147702 |
| C  | -1.132638 | 1.621243  | -2.243157 |
| C  | -1.796074 | 2.474525  | -3.108214 |
| C  | -3.155315 | 2.735865  | -2.910312 |
| C  | -3.857309 | 2.152578  | -1.847374 |
| C  | -3.194333 | 1.315658  | -0.970079 |
| Au | 0.874694  | -0.445241 | -0.463299 |
| P  | 3.109250  | -1.196443 | -0.738111 |
| H  | -3.162788 | -1.218652 | 3.284568  |
| H  | -2.175055 | -2.714072 | 3.048980  |
| H  | -1.377639 | -1.170589 | 3.477839  |
| H  | -4.176892 | -3.740462 | -0.242242 |
| H  | -4.169079 | -3.351581 | 1.522603  |
| H  | -4.576646 | -2.055333 | 0.302569  |
| H  | 0.169965  | 4.126300  | 0.466073  |
| H  | 2.651191  | 4.432362  | 0.363586  |
| H  | 3.168143  | 0.949090  | 2.861576  |
| H  | 0.703249  | 0.619141  | 2.909837  |
| H  | -0.066554 | 1.402075  | -2.380607 |
| H  | -1.263235 | 2.939453  | -3.943283 |
| H  | -3.681289 | 3.407284  | -3.598102 |
| H  | -4.922688 | 2.363491  | -1.712791 |
| H  | -3.738811 | 0.854353  | -0.136285 |
| H  | -2.941110 | 2.905313  | 1.591670  |
| H  | 4.148499  | 2.849699  | 1.576030  |
| C  | 3.326460  | -2.361587 | -2.121570 |
| C  | 4.288513  | 0.152979  | -1.064573 |
| C  | 3.782445  | -2.064124 | 0.715403  |
| H  | 4.828002  | -2.372927 | 0.528499  |
| H  | 3.751071  | -1.395270 | 1.593680  |
| H  | 3.170855  | -2.957663 | 0.931796  |
| H  | 5.313828  | -0.248313 | -1.169837 |
| H  | 4.004323  | 0.677786  | -1.993637 |
| H  | 4.259981  | 0.877288  | -0.230190 |
| H  | 2.692963  | -3.251529 | -1.959555 |
| H  | 3.018639  | -1.879065 | -3.065951 |
| H  | 4.384438  | -2.674388 | -2.198475 |

### Benzaldehyde

14

scf done: -345.064466

|   |           |           |           |
|---|-----------|-----------|-----------|
| C | -4.891355 | 2.255582  | -0.002960 |
| O | -4.438512 | 2.790682  | -0.987300 |
| H | -4.726602 | 2.694415  | 1.018897  |
| C | -5.684566 | 1.012755  | -0.006702 |
| C | -5.965219 | 0.359396  | -1.214169 |
| C | -6.156946 | 0.486893  | 1.200591  |
| C | -6.713188 | -0.811225 | -1.210153 |

|   |           |           |           |
|---|-----------|-----------|-----------|
| H | -5.584200 | 0.790608  | -2.147148 |
| C | -6.907116 | -0.686458 | 1.204480  |
| H | -5.930758 | 1.007340  | 2.140470  |
| C | -7.183432 | -1.332788 | -0.000642 |
| H | -6.935763 | -1.326698 | -2.151131 |
| H | -7.278395 | -1.100264 | 2.148513  |
| H | -7.773552 | -2.256514 | 0.000533  |

# TS<sub>5c1</sub>

54

scf done: -1965.635043

|    |           |           |           |
|----|-----------|-----------|-----------|
| N  | -0.186507 | -1.791298 | 1.178599  |
| C  | -0.488365 | -2.120266 | -0.063229 |
| N  | 0.608583  | -1.965285 | -0.840664 |
| C  | 1.350784  | -1.243511 | 0.086651  |
| C  | 1.081535  | 0.111532  | -0.374511 |
| Au | -0.703626 | 1.061287  | 0.198166  |
| P  | -2.837129 | 1.913016  | 0.753970  |
| C  | 2.001635  | 0.666614  | -1.338845 |
| C  | -1.795824 | -2.512941 | -0.598006 |
| C  | -2.795420 | -3.003778 | 0.252101  |
| C  | -2.064190 | -2.346736 | -1.963104 |
| C  | -4.051566 | -3.318411 | -0.256897 |
| H  | -2.582148 | -3.158324 | 1.316900  |
| C  | -3.323606 | -2.656173 | -2.468163 |
| H  | -1.274858 | -1.960680 | -2.618048 |
| C  | -4.317201 | -3.140539 | -1.615806 |
| H  | -4.828647 | -3.709516 | 0.408834  |
| H  | -3.533586 | -2.519740 | -3.534696 |
| N  | 2.494794  | -1.686139 | 0.652833  |
| H  | -5.307598 | -3.386594 | -2.015199 |
| H  | -0.941859 | -1.601098 | 1.847867  |
| C  | -4.038969 | 0.551381  | 0.917154  |
| C  | -2.942869 | 2.819321  | 2.330432  |
| C  | -3.563713 | 3.034565  | -0.483423 |
| H  | -2.291603 | 3.710090  | 2.294737  |
| H  | -3.985790 | 3.136301  | 2.517651  |
| H  | -2.604395 | 2.169321  | 3.156408  |
| H  | -3.613558 | 2.524205  | -1.461359 |
| H  | -4.582162 | 3.336366  | -0.175415 |
| H  | -2.932381 | 3.934366  | -0.588746 |
| H  | -3.713619 | -0.130176 | 1.724260  |
| H  | -5.045122 | 0.945431  | 1.154788  |
| H  | -4.081724 | -0.024663 | -0.026076 |
| C  | 1.909653  | 2.046045  | -1.631753 |
| C  | 2.801948  | 2.652014  | -2.504434 |
| C  | 3.770485  | 1.881481  | -3.149145 |
| C  | 3.852369  | 0.505351  | -2.911222 |
| C  | 2.990674  | -0.096593 | -2.008097 |
| H  | 1.128884  | 2.639138  | -1.139776 |
| H  | 2.732695  | 3.726986  | -2.699632 |
| H  | 4.462443  | 2.353318  | -3.855421 |
| H  | 4.597949  | -0.098572 | -3.438826 |
| H  | 3.057878  | -1.177067 | -1.841888 |
| S  | 3.320752  | -0.615107 | 1.744839  |
| C  | 2.672979  | -3.117529 | 0.876308  |
| C  | 4.897241  | -0.407150 | 0.973042  |
| O  | 2.581243  | 0.640091  | 1.694957  |
| O  | 3.480396  | -1.343477 | 2.988430  |
| H  | 3.746308  | -3.365564 | 0.902843  |

|   |          |           |           |
|---|----------|-----------|-----------|
| H | 2.190609 | -3.422190 | 1.821190  |
| H | 2.205661 | -3.644730 | 0.029142  |
| H | 5.480181 | 0.236914  | 1.653322  |
| H | 5.380309 | -1.392497 | 0.872530  |
| H | 4.750791 | 0.081894  | -0.004306 |

# 5c1

54

scf done: -1965.655971

|    |           |           |           |
|----|-----------|-----------|-----------|
| C  | 0.234894  | -0.379766 | 0.501802  |
| N  | 1.522850  | 0.489529  | -1.269589 |
| C  | 2.762036  | 0.590186  | -0.630776 |
| N  | 2.392972  | 1.056093  | 0.526702  |
| C  | 0.998223  | 0.844136  | 0.072068  |
| C  | 0.828849  | -1.422470 | 1.270298  |
| C  | 1.902625  | -1.226717 | 2.181944  |
| C  | 2.422660  | -2.295910 | 2.891719  |
| C  | 1.908369  | -3.582403 | 2.700582  |
| C  | 0.844387  | -3.802180 | 1.820992  |
| C  | 0.293769  | -2.732157 | 1.137284  |
| N  | 0.174612  | 2.028897  | 0.085780  |
| C  | 0.529519  | 3.140505  | -0.782879 |
| S  | -0.460956 | 2.406623  | 1.593167  |
| O  | -1.700588 | 3.140840  | 1.393737  |
| O  | -0.464429 | 1.127838  | 2.318883  |
| C  | 0.727512  | 3.468282  | 2.372263  |
| C  | 4.072656  | 0.259994  | -1.158147 |
| C  | 4.248269  | -0.011267 | -2.521043 |
| C  | 5.512832  | -0.333755 | -3.003838 |
| C  | 6.598983  | -0.385453 | -2.129268 |
| C  | 6.426041  | -0.115266 | -0.769639 |
| C  | 5.165289  | 0.206405  | -0.281496 |
| H  | 2.286100  | -0.216994 | 2.343576  |
| H  | 3.234892  | -2.132956 | 3.607610  |
| H  | 2.333177  | -4.424354 | 3.258753  |
| H  | 0.438650  | -4.809914 | 1.687113  |
| H  | -0.553298 | -2.887467 | 0.458105  |
| H  | -0.213003 | 3.943873  | -0.645036 |
| H  | 1.545727  | 3.531640  | -0.574731 |
| H  | 0.480893  | 2.806425  | -1.831510 |
| H  | 0.376084  | 3.626578  | 3.405516  |
| H  | 1.702208  | 2.951874  | 2.355378  |
| H  | 0.766005  | 4.427605  | 1.831557  |
| H  | 3.393712  | 0.045034  | -3.206207 |
| H  | 7.282320  | -0.160239 | -0.088073 |
| H  | 5.007113  | 0.413234  | 0.783417  |
| H  | 5.654425  | -0.543106 | -4.069510 |
| Au | -1.697520 | -0.485053 | -0.303913 |
| P  | -3.931536 | -0.460543 | -1.113279 |
| H  | 1.192522  | -0.311371 | -1.818937 |
| H  | 7.593828  | -0.640149 | -2.511594 |
| C  | -4.094789 | 0.065266  | -2.850760 |
| C  | -4.822468 | -2.047733 | -1.025953 |
| C  | -4.970681 | 0.708214  | -0.176575 |
| H  | -3.552096 | -0.637906 | -3.506934 |
| H  | -5.160799 | 0.089958  | -3.144733 |
| H  | -3.657907 | 1.071694  | -2.976129 |
| H  | -4.845025 | -2.405140 | 0.018542  |
| H  | -5.858866 | -1.924277 | -1.391995 |
| H  | -4.304952 | -2.801823 | -1.644704 |

|   |           |          |           |
|---|-----------|----------|-----------|
| H | -4.522184 | 1.716831 | -0.216388 |
| H | -5.992459 | 0.741475 | -0.598638 |
| H | -5.021370 | 0.392339 | 0.880544  |

# TS<sub>5c2</sub>

54

scf done: -1965.637822

|    |           |           |           |
|----|-----------|-----------|-----------|
| N  | -0.224900 | 1.478165  | 0.827330  |
| C  | -1.057207 | 1.926476  | -0.122039 |
| N  | -1.556733 | 0.899900  | -0.802737 |
| C  | -1.226592 | -0.084885 | 0.089310  |
| C  | -0.286725 | -1.084783 | -0.463382 |
| Au | 1.730493  | -0.514739 | -0.077619 |
| P  | 3.945258  | 0.186040  | 0.328055  |
| N  | -0.651295 | -2.116221 | -1.159575 |
| C  | 0.291902  | -3.028815 | -1.817572 |
| S  | -2.399819 | -2.597791 | -1.499585 |
| H  | 0.037557  | -4.074345 | -1.577301 |
| H  | 0.237539  | -2.888134 | -2.908771 |
| H  | 1.304569  | -2.799561 | -1.452594 |
| O  | -3.203052 | -1.409706 | -1.312104 |
| O  | -2.331916 | -3.288895 | -2.770707 |
| C  | -2.691288 | -3.746473 | -0.183836 |
| H  | -3.709861 | -4.132489 | -0.363292 |
| H  | -1.956643 | -4.565202 | -0.242872 |
| H  | -2.640244 | -3.203221 | 0.775562  |
| C  | -1.386383 | 3.328835  | -0.411165 |
| C  | -0.579493 | 4.366441  | 0.072641  |
| C  | -2.522896 | 3.632951  | -1.171588 |
| C  | -0.911941 | 5.692016  | -0.190815 |
| H  | 0.327132  | 4.131955  | 0.643814  |
| C  | -2.852474 | 4.958783  | -1.435863 |
| H  | -3.146380 | 2.812354  | -1.545196 |
| C  | -2.048917 | 5.988562  | -0.943689 |
| H  | -0.276374 | 6.500510  | 0.187069  |
| H  | -3.744116 | 5.193300  | -2.027879 |
| C  | -1.999574 | -0.441157 | 1.297584  |
| C  | -3.299422 | 0.050961  | 1.457331  |
| C  | -1.464543 | -1.322221 | 2.248332  |
| C  | -4.053450 | -0.332064 | 2.562161  |
| H  | -3.717490 | 0.714194  | 0.691346  |
| C  | -2.223247 | -1.700955 | 3.351745  |
| H  | -0.437258 | -1.696126 | 2.135479  |
| C  | -3.520143 | -1.208293 | 3.508581  |
| H  | -5.073902 | 0.048392  | 2.680806  |
| H  | -1.798829 | -2.382270 | 4.097174  |
| H  | -4.119823 | -1.511173 | 4.374044  |
| H  | -2.309534 | 7.032623  | -1.151526 |
| H  | -0.081360 | 2.070296  | 1.656502  |
| C  | 4.052617  | 1.996680  | 0.498382  |
| C  | 4.660022  | -0.476937 | 1.866313  |
| C  | 5.144348  | -0.238372 | -0.974470 |
| H  | 4.714325  | -1.578341 | 1.808867  |
| H  | 5.675773  | -0.068045 | 2.021478  |
| H  | 4.020182  | -0.199685 | 2.722404  |
| H  | 4.822509  | 0.204020  | -1.933578 |
| H  | 6.146780  | 0.148174  | -0.711389 |
| H  | 5.195240  | -1.334966 | -1.091948 |
| H  | 3.400158  | 2.330053  | 1.325322  |
| H  | 5.094670  | 2.304609  | 0.704958  |

|   |          |          |           |
|---|----------|----------|-----------|
| H | 3.707340 | 2.476892 | -0.434493 |
|---|----------|----------|-----------|

## 5c2

54

scf done: -1965.667921

|    |           |           |           |
|----|-----------|-----------|-----------|
| N  | 0.847902  | -1.120576 | 0.755988  |
| C  | 2.010246  | -1.364465 | 0.029082  |
| N  | 2.275664  | -0.176622 | -0.433310 |
| C  | 1.145729  | 0.307816  | 0.398332  |
| C  | 0.043169  | 0.868060  | -0.471160 |
| Au | -1.849642 | -0.041736 | -0.192946 |
| P  | -3.944189 | -1.079105 | 0.191919  |
| N  | 0.272210  | 1.796594  | -1.351351 |
| C  | -0.733659 | 2.219017  | -2.335396 |
| S  | 1.893909  | 2.638303  | -1.659542 |
| H  | -1.166725 | 3.194462  | -2.057571 |
| H  | -0.264365 | 2.278239  | -3.331840 |
| H  | -1.532877 | 1.463280  | -2.367549 |
| O  | 2.662147  | 2.601632  | -0.435269 |
| O  | 2.367242  | 2.076516  | -2.908422 |
| C  | 1.359027  | 4.314946  | -1.897297 |
| H  | 2.305988  | 4.879426  | -1.955716 |
| H  | 0.794139  | 4.427916  | -2.833504 |
| H  | 0.787369  | 4.632276  | -1.010162 |
| C  | 2.701807  | -2.628161 | -0.169615 |
| C  | 2.160080  | -3.821782 | 0.322286  |
| C  | 3.922090  | -2.640965 | -0.858812 |
| C  | 2.837687  | -5.021999 | 0.127695  |
| H  | 1.198856  | -3.809222 | 0.850135  |
| C  | 4.593436  | -3.842253 | -1.053192 |
| H  | 4.331464  | -1.695673 | -1.233167 |
| C  | 4.052322  | -5.031670 | -0.558836 |
| H  | 2.415354  | -5.957240 | 0.510983  |
| H  | 5.547528  | -3.855481 | -1.591313 |
| C  | 1.463611  | 1.132359  | 1.621930  |
| C  | 2.722322  | 1.033202  | 2.222027  |
| C  | 0.484034  | 1.937534  | 2.209384  |
| C  | 2.994383  | 1.729809  | 3.394698  |
| H  | 3.499553  | 0.423209  | 1.747372  |
| C  | 0.761629  | 2.641305  | 3.382191  |
| H  | -0.513341 | 2.020696  | 1.756724  |
| C  | 2.015784  | 2.537679  | 3.977926  |
| H  | 3.986025  | 1.650739  | 3.854444  |
| H  | -0.012894 | 3.272442  | 3.832237  |
| H  | 2.235189  | 3.089462  | 4.898933  |
| H  | 4.584690  | -5.977370 | -0.711145 |
| H  | 0.763424  | -1.391880 | 1.740879  |
| C  | -3.804217 | -2.796148 | 0.784990  |
| C  | -4.966031 | -0.234884 | 1.442110  |
| C  | -5.008868 | -1.183307 | -1.282845 |
| H  | -5.172221 | 0.800340  | 1.117673  |
| H  | -5.923172 | -0.772022 | 1.579249  |
| H  | -4.425923 | -0.201239 | 2.404599  |
| H  | -4.492747 | -1.749706 | -2.077828 |
| H  | -5.958891 | -1.691002 | -1.031328 |
| H  | -5.226707 | -0.168123 | -1.658426 |
| H  | -3.240456 | -2.817801 | 1.734198  |
| H  | -4.809120 | -3.229017 | 0.946537  |
| H  | -3.261157 | -3.403358 | 0.039465  |



# TS<sub>6c1A</sub>

54

scf done: -1965.644633

|    |           |           |           |
|----|-----------|-----------|-----------|
| H  | 0.856304  | 0.780142  | 1.465159  |
| N  | 1.238698  | 0.256680  | 0.671642  |
| C  | 2.576368  | 0.228870  | 0.192722  |
| N  | 2.375893  | 0.473143  | -1.063456 |
| C  | 0.936224  | 0.612041  | -0.733508 |
| C  | 0.108899  | -0.607813 | -0.605649 |
| Au | -1.853362 | -0.366969 | 0.121826  |
| P  | -4.075350 | -0.096452 | 0.907579  |
| C  | 0.606833  | -1.898328 | -1.040090 |
| C  | 3.764838  | -0.102577 | 0.946578  |
| C  | 3.680928  | -0.388298 | 2.315808  |
| C  | 5.004661  | -0.136569 | 0.290954  |
| C  | 4.833359  | -0.710114 | 3.025077  |
| H  | 2.710601  | -0.361821 | 2.825272  |
| C  | 6.151314  | -0.456932 | 1.005688  |
| H  | 5.050996  | 0.088473  | -0.780547 |
| C  | 6.065192  | -0.743427 | 2.370984  |
| H  | 4.771863  | -0.935921 | 4.094796  |
| H  | 7.121822  | -0.486195 | 0.499087  |
| H  | 6.971982  | -0.996021 | 2.931779  |
| N  | 0.273401  | 1.811187  | -1.093966 |
| S  | 0.893672  | 3.293080  | -0.549045 |
| C  | -0.333878 | 1.785068  | -2.421901 |
| H  | 0.413962  | 1.597222  | -3.219374 |
| H  | -1.100872 | 0.988607  | -2.448409 |
| H  | -0.836299 | 2.747808  | -2.605546 |
| O  | -0.164310 | 4.268726  | -0.752359 |
| O  | 1.414343  | 3.032777  | 0.788939  |
| C  | 2.243824  | 3.690283  | -1.629237 |
| H  | 2.671730  | 4.635264  | -1.254784 |
| H  | 2.981684  | 2.872618  | -1.588447 |
| H  | 1.849630  | 3.828558  | -2.649398 |
| C  | 0.180681  | -3.065803 | -0.372552 |
| C  | 0.610428  | -4.315352 | -0.791242 |
| C  | 1.431648  | -4.426371 | -1.918149 |
| C  | 1.831063  | -3.286190 | -2.613036 |
| C  | 1.440166  | -2.025916 | -2.170660 |
| H  | -0.484516 | -2.969106 | 0.494651  |
| H  | 0.292206  | -5.213772 | -0.251946 |
| H  | 1.752696  | -5.415754 | -2.262881 |
| H  | 2.459417  | -3.377952 | -3.505344 |
| H  | 1.758072  | -1.133069 | -2.717141 |
| C  | -5.072858 | -1.621432 | 0.881037  |
| C  | -4.185237 | 0.495216  | 2.628010  |
| C  | -5.047706 | 1.106529  | -0.055944 |
| H  | -6.094228 | -1.416296 | 1.252780  |
| H  | -5.131748 | -2.010190 | -0.150779 |
| H  | -4.600056 | -2.388745 | 1.519057  |
| H  | -6.066984 | 1.197433  | 0.363523  |
| H  | -4.552335 | 2.092927  | -0.028549 |
| H  | -5.113892 | 0.775438  | -1.107368 |
| H  | -5.244682 | 0.601659  | 2.927519  |
| H  | -3.686463 | -0.222779 | 3.302690  |
| H  | -3.680510 | 1.473117  | 2.719462  |

**6c1A**

54

scf done: -1965.653913

|    |           |           |           |
|----|-----------|-----------|-----------|
| N  | -1.428449 | 0.214271  | -0.913310 |
| C  | -2.715616 | 0.743391  | -0.467407 |
| N  | -2.355817 | 1.555479  | 0.458449  |
| C  | -0.941893 | 1.277716  | 0.187218  |
| C  | -0.545096 | -0.133107 | 0.304267  |
| Au | 1.425728  | -0.699919 | -0.288969 |
| P  | 3.680190  | -1.102218 | -0.852922 |
| C  | -1.190280 | -0.997930 | 1.321011  |
| C  | -4.005765 | 0.315220  | -0.947840 |
| C  | -4.112822 | -0.686287 | -1.923607 |
| C  | -5.159952 | 0.911749  | -0.414100 |
| C  | -5.369727 | -1.094895 | -2.355706 |
| H  | -3.211650 | -1.150599 | -2.341476 |
| C  | -6.410237 | 0.500155  | -0.852908 |
| H  | -5.055490 | 1.694021  | 0.345841  |
| C  | -6.514461 | -0.502224 | -1.821816 |
| H  | -5.458592 | -1.879257 | -3.114375 |
| H  | -7.314012 | 0.959827  | -0.439475 |
| N  | -0.107646 | 2.325497  | -0.099054 |
| H  | -7.503583 | -0.824112 | -2.165983 |
| H  | -1.077330 | 0.122407  | -1.871705 |
| C  | 4.154620  | -0.356218 | -2.447123 |
| C  | 4.777720  | -0.297093 | 0.359818  |
| C  | 4.256710  | -2.827807 | -0.946682 |
| H  | 4.632314  | -0.754651 | 1.354490  |
| H  | 5.837147  | -0.400207 | 0.058797  |
| H  | 4.511570  | 0.773791  | 0.424257  |
| H  | 3.693827  | -3.368157 | -1.727877 |
| H  | 5.335897  | -2.857732 | -1.187139 |
| H  | 4.084435  | -3.330620 | 0.021205  |
| H  | 3.917224  | 0.722876  | -2.423723 |
| H  | 5.237592  | -0.489122 | -2.629091 |
| H  | 3.585688  | -0.825281 | -3.269168 |
| S  | 1.357714  | 2.548782  | 0.770445  |
| C  | -0.575532 | 3.420569  | -0.942356 |
| H  | 0.295642  | 3.929616  | -1.387387 |
| H  | -1.169409 | 3.003658  | -1.773258 |
| H  | -1.197346 | 4.144826  | -0.384792 |
| C  | 1.095633  | 4.118016  | 1.552746  |
| O  | 1.404727  | 1.524908  | 1.805627  |
| O  | 2.437029  | 2.681569  | -0.198012 |
| H  | 1.984403  | 4.274252  | 2.187168  |
| H  | 1.029128  | 4.914977  | 0.796619  |
| H  | 0.184441  | 4.056850  | 2.169029  |
| C  | -1.186355 | -0.605388 | 2.663996  |
| C  | -1.745548 | -1.433624 | 3.635383  |
| C  | -2.321307 | -2.651446 | 3.274007  |
| C  | -2.330725 | -3.042660 | 1.934265  |
| C  | -1.761653 | -2.223800 | 0.962195  |
| H  | -0.732430 | 0.354645  | 2.941253  |
| H  | -1.738821 | -1.119214 | 4.685297  |
| H  | -2.765900 | -3.298252 | 4.038737  |
| H  | -2.783020 | -3.997716 | 1.643633  |
| H  | -1.757506 | -2.535007 | -0.091282 |

**TS<sub>6c1B</sub>**

54

```

scf done: -1965.654478
N      -1.343208      0.222464      -1.315630
C      -2.574944      0.562282      -0.911264
N      -2.284019      1.612405      -0.108299
C      -0.860657      1.208271      -0.307476
C      -0.365236      0.035676      0.433665
Au      1.540090      -0.673021      -0.061952
P      3.749053      -1.354332      -0.580460
C      -1.179529      -0.585604      1.461133
C      -3.837073      -0.076311      -1.189342
C      -3.837344      -1.317143      -1.845756
C      -5.044315      0.514512      -0.786663
C      -5.041882      -1.962674      -2.092984
H      -2.882649      -1.763323      -2.146655
C      -6.245239      -0.136585      -1.039454
H      -5.041114      1.491180      -0.288415
C      -6.242189      -1.372602      -1.690050
H      -5.050278      -2.932659      -2.600931
H      -7.191378      0.319888      -0.730854
N      0.056990      2.198295      -0.703472
H      -7.191115      -1.883978      -1.886340
C      4.102768      -1.416520      -2.367492
C      4.992211      -0.207060      0.098629
C      4.244363      -2.992822      0.044767
H      4.919683      -0.196883      1.200664
H      6.011368      -0.518141      -0.198381
H      4.794012      0.814313      -0.272324
H      3.589223      -3.771274      -0.384354
H      5.294062      -3.205361      -0.231951
H      4.144817      -3.016722      1.144211
H      3.919670      -0.423796      -2.815223
H      5.155329      -1.708313      -2.541499
H      3.435389      -2.149201      -2.854582
H      -2.776628      1.918604      0.733350
S      1.011686      2.905370      0.493652
C      -0.178355      2.935794      -1.934279
H      0.752341      3.446382      -2.232536
H      -0.439289      2.212729      -2.724919
H      -0.998738      3.674221      -1.835549
C      0.243283      4.471236      0.816624
O      0.844909      2.066553      1.681779
O      2.332453      3.142714      -0.067842
H      0.827349      4.940236      1.625999
H      0.282746      5.095111      -0.090450
H      -0.795314      4.291144      1.141377
C      -1.794480      0.171676      2.477094
C      -2.550966      -0.458938      3.460544
C      -2.736562      -1.840096      3.421610
C      -2.130296      -2.602498      2.419131
C      -1.332096      -1.985991      1.465775
H      -1.612184      1.251201      2.535496
H      -3.001290      0.134776      4.263309
H      -3.347044      -2.331016      4.187568
H      -2.269068      -3.688624      2.395132
H      -0.835766      -2.576727      0.685576

```

### 6c1B

54

```

scf done: -1965.662751
N      -1.269925      0.459449      -1.185164

```

|    |           |           |           |
|----|-----------|-----------|-----------|
| C  | -2.525313 | 0.967302  | -0.828276 |
| N  | -2.105667 | 1.972142  | -0.086894 |
| C  | -0.723172 | 1.460807  | -0.221710 |
| C  | -0.594309 | 0.026865  | 0.146539  |
| Au | 1.323452  | -0.820559 | -0.143117 |
| P  | 3.588277  | -1.454121 | -0.407537 |
| C  | -1.480125 | -0.572324 | 1.172751  |
| C  | -3.811384 | 0.400214  | -1.083730 |
| C  | -3.916674 | -0.631469 | -2.032817 |
| C  | -4.934070 | 0.808005  | -0.341367 |
| C  | -5.141198 | -1.252509 | -2.233633 |
| H  | -3.029285 | -0.932101 | -2.601097 |
| C  | -6.151438 | 0.175864  | -0.545231 |
| H  | -4.844791 | 1.600497  | 0.410765  |
| C  | -6.252863 | -0.850653 | -1.489193 |
| H  | -5.234983 | -2.055782 | -2.971303 |
| H  | -7.029025 | 0.476783  | 0.035578  |
| N  | 0.304819  | 2.348864  | -0.526707 |
| H  | -7.217006 | -1.346680 | -1.645957 |
| C  | 4.360000  | -0.581479 | -1.810432 |
| C  | 4.576843  | -0.931620 | 1.033178  |
| C  | 4.015431  | -3.208921 | -0.656090 |
| H  | 4.235378  | -1.466867 | 1.936810  |
| H  | 5.650380  | -1.139845 | 0.866525  |
| H  | 4.428806  | 0.152538  | 1.187961  |
| H  | 3.532296  | -3.584479 | -1.575256 |
| H  | 5.111880  | -3.324876 | -0.746595 |
| H  | 3.655464  | -3.806924 | 0.199474  |
| H  | 4.205739  | 0.504434  | -1.674257 |
| H  | 5.443305  | -0.800374 | -1.858853 |
| H  | 3.881303  | -0.893123 | -2.755820 |
| H  | -2.565450 | 2.611747  | 0.563394  |
| S  | 1.589183  | 2.526675  | 0.569253  |
| C  | 0.539857  | 2.703358  | -1.921705 |
| H  | 1.134755  | 3.628830  | -1.988000 |
| H  | 1.067400  | 1.893274  | -2.461324 |
| H  | -0.434159 | 2.891880  | -2.404181 |
| C  | 1.597171  | 4.271891  | 0.878805  |
| O  | 1.196698  | 1.848582  | 1.799747  |
| O  | 2.836567  | 2.183941  | -0.108558 |
| H  | 2.433207  | 4.450851  | 1.575437  |
| H  | 1.766805  | 4.819550  | -0.061604 |
| H  | 0.636989  | 4.547876  | 1.341385  |
| C  | -1.704154 | 0.065025  | 2.399239  |
| C  | -2.565788 | -0.502415 | 3.337743  |
| C  | -3.215458 | -1.704310 | 3.060119  |
| C  | -2.985227 | -2.351293 | 1.844103  |
| C  | -2.115642 | -1.794259 | 0.911371  |
| H  | -1.190777 | 1.010901  | 2.613787  |
| H  | -2.736296 | 0.005739  | 4.293883  |
| H  | -3.899090 | -2.143009 | 3.795737  |
| H  | -3.485860 | -3.300888 | 1.622753  |
| H  | -1.926384 | -2.302629 | -0.044097 |

# TS<sub>6c2A</sub>

54

scf done: -1965.646778

|   |           |          |           |
|---|-----------|----------|-----------|
| N | -1.259882 | 0.468925 | -0.968054 |
| C | -2.607954 | 0.710211 | -0.520717 |
| N | -2.370853 | 1.203565 | 0.643626  |

|    |           |           |           |
|----|-----------|-----------|-----------|
| C  | -0.923530 | 1.110997  | 0.363573  |
| C  | -0.386937 | -0.261902 | 0.266139  |
| Au | 1.625849  | -0.539347 | -0.333713 |
| P  | 3.909208  | -0.789085 | -0.927502 |
| N  | -1.102296 | -1.282582 | 0.874791  |
| C  | -1.141485 | -2.597482 | 0.255829  |
| S  | -1.674085 | -1.118381 | 2.474378  |
| H  | -0.197696 | -3.160811 | 0.402274  |
| H  | -1.989174 | -3.171545 | 0.667380  |
| H  | -1.325187 | -2.476472 | -0.826557 |
| O  | -1.168098 | 0.157041  | 2.965999  |
| O  | -3.093455 | -1.433709 | 2.513094  |
| C  | -0.785620 | -2.407185 | 3.313222  |
| H  | -1.046882 | -2.295524 | 4.379008  |
| H  | -1.105752 | -3.396187 | 2.950854  |
| H  | 0.293896  | -2.243353 | 3.158940  |
| C  | -3.828594 | 0.307245  | -1.179690 |
| C  | -3.808792 | -0.254031 | -2.463379 |
| C  | -5.042129 | 0.465091  | -0.492525 |
| C  | -5.001359 | -0.652739 | -3.058343 |
| H  | -2.860505 | -0.380098 | -2.999240 |
| C  | -6.227968 | 0.065905  | -1.093819 |
| H  | -5.032066 | 0.892118  | 0.516554  |
| C  | -6.207361 | -0.490789 | -2.375593 |
| H  | -4.991341 | -1.091989 | -4.061349 |
| H  | -7.177843 | 0.183889  | -0.561770 |
| C  | -0.080087 | 2.322186  | 0.486195  |
| C  | -0.275812 | 3.413019  | -0.363745 |
| C  | 0.885006  | 2.381272  | 1.495670  |
| C  | 0.510566  | 4.553403  | -0.219903 |
| H  | -1.043819 | 3.368279  | -1.146739 |
| C  | 1.662030  | 3.527851  | 1.643025  |
| H  | 1.009233  | 1.526812  | 2.171729  |
| C  | 1.479159  | 4.610706  | 0.782752  |
| H  | 0.364311  | 5.404906  | -0.893322 |
| H  | 2.415991  | 3.576625  | 2.436386  |
| H  | 2.095224  | 5.509751  | 0.896322  |
| H  | -7.145128 | -0.804920 | -2.847190 |
| H  | -0.806476 | 0.643948  | -1.870687 |
| C  | 4.729503  | 0.805999  | -1.252246 |
| C  | 4.943612  | -1.584721 | 0.344390  |
| C  | 4.200835  | -1.774024 | -2.433034 |
| H  | 4.571712  | -2.605131 | 0.543621  |
| H  | 5.993484  | -1.639473 | 0.000260  |
| H  | 4.897083  | -1.003330 | 1.282064  |
| H  | 3.675599  | -1.314147 | -3.288614 |
| H  | 5.283640  | -1.823903 | -2.652789 |
| H  | 3.811034  | -2.797153 | -2.289483 |
| H  | 4.659231  | 1.449068  | -0.356855 |
| H  | 5.794249  | 0.646481  | -1.505491 |
| H  | 4.227507  | 1.318910  | -2.091625 |

## 6c2A

54

scf done: -1965.652350

|   |           |           |           |
|---|-----------|-----------|-----------|
| N | -1.302395 | 0.418802  | -0.939730 |
| C | -2.644962 | 0.656181  | -0.458936 |
| N | -2.389522 | 1.121211  | 0.712225  |
| C | -0.947677 | 1.056642  | 0.407508  |
| C | -0.410829 | -0.300838 | 0.226088  |

|    |           |           |           |
|----|-----------|-----------|-----------|
| Au | 1.611702  | -0.525262 | -0.380602 |
| P  | 3.911668  | -0.690702 | -0.928576 |
| N  | -1.092672 | -1.364514 | 0.836109  |
| C  | -0.965973 | -2.680930 | 0.226898  |
| S  | -1.308303 | -1.309693 | 2.526640  |
| H  | 0.065057  | -3.078569 | 0.304399  |
| H  | -1.660042 | -3.387193 | 0.710374  |
| H  | -1.248529 | -2.598800 | -0.837937 |
| O  | -0.780354 | -2.560995 | 3.053197  |
| O  | -0.759931 | -0.035315 | 2.976608  |
| C  | -3.066301 | -1.314091 | 2.748225  |
| H  | -3.240847 | -1.386716 | 3.835209  |
| H  | -3.465201 | -0.372643 | 2.339163  |
| H  | -3.480856 | -2.196784 | 2.233386  |
| C  | -3.871603 | 0.284359  | -1.122657 |
| C  | -3.842549 | -0.402622 | -2.344010 |
| C  | -5.097254 | 0.600422  | -0.515277 |
| C  | -5.036157 | -0.778898 | -2.950810 |
| H  | -2.884328 | -0.650642 | -2.815421 |
| C  | -6.284036 | 0.223485  | -1.128862 |
| H  | -5.101787 | 1.144756  | 0.436161  |
| C  | -6.253081 | -0.465286 | -2.344804 |
| H  | -5.018354 | -1.319324 | -3.902897 |
| H  | -7.243364 | 0.467178  | -0.660454 |
| C  | -0.135354 | 2.288787  | 0.524860  |
| C  | -0.518647 | 3.442625  | -0.165097 |
| C  | 0.984381  | 2.312021  | 1.362228  |
| C  | 0.233982  | 4.607006  | -0.044008 |
| H  | -1.408925 | 3.427955  | -0.806500 |
| C  | 1.728397  | 3.483157  | 1.489625  |
| H  | 1.253810  | 1.413210  | 1.929383  |
| C  | 1.358376  | 4.626940  | 0.782448  |
| H  | -0.060789 | 5.506768  | -0.594797 |
| H  | 2.602444  | 3.502940  | 2.149944  |
| H  | 1.948088  | 5.545285  | 0.880370  |
| H  | -7.191954 | -0.760038 | -2.826429 |
| H  | -0.876712 | 0.626649  | -1.849655 |
| C  | 4.320993  | -0.140533 | -2.617720 |
| C  | 4.941364  | 0.351028  | 0.157393  |
| C  | 4.635722  | -2.357636 | -0.798877 |
| H  | 4.817141  | 0.028499  | 1.206538  |
| H  | 6.008054  | 0.273979  | -0.124624 |
| H  | 4.616009  | 1.403562  | 0.074099  |
| H  | 4.118340  | -3.044015 | -1.491977 |
| H  | 5.712348  | -2.327579 | -1.051081 |
| H  | 4.512542  | -2.738747 | 0.230056  |
| H  | 3.992242  | 0.904425  | -2.758085 |
| H  | 5.411893  | -0.205836 | -2.788558 |
| H  | 3.798757  | -0.775892 | -3.354685 |

# TS<sub>6c2B</sub>

54

scf done: -1965.653285

|    |           |           |           |
|----|-----------|-----------|-----------|
| Au | 1.427495  | -0.520671 | -0.130433 |
| P  | 3.621150  | -1.122272 | -0.765502 |
| C  | 4.307356  | -2.569196 | 0.105029  |
| C  | -0.462417 | 0.158188  | 0.540660  |
| C  | -0.716786 | 1.612542  | 0.429380  |
| C  | 0.354330  | 2.639819  | 0.428436  |
| C  | 0.338274  | 3.651459  | -0.534740 |

|   |           |           |           |
|---|-----------|-----------|-----------|
| C | 1.330528  | 4.627957  | -0.532249 |
| C | 2.336004  | 4.598660  | 0.435641  |
| C | 2.349250  | 3.593411  | 1.402784  |
| C | 1.360038  | 2.612061  | 1.398737  |
| H | 1.368493  | 1.812333  | 2.151247  |
| H | 3.137301  | 3.571221  | 2.163613  |
| H | 3.117776  | 5.366599  | 0.434884  |
| H | 1.323145  | 5.416603  | -1.292712 |
| H | -0.452597 | 3.660300  | -1.295143 |
| N | -2.101540 | 2.013690  | 0.725528  |
| C | -2.476246 | 1.309397  | -0.342977 |
| N | -1.243443 | 0.966873  | -0.811052 |
| C | -3.758282 | 0.840931  | -0.793383 |
| C | -3.783618 | -0.096938 | -1.839367 |
| C | -4.995825 | -0.644388 | -2.239214 |
| C | -6.177318 | -0.253465 | -1.604839 |
| C | -6.155264 | 0.683448  | -0.568006 |
| C | -4.947845 | 1.233018  | -0.158181 |
| H | -4.926210 | 1.967218  | 0.655591  |
| H | -7.087406 | 0.982898  | -0.078146 |
| H | -7.132312 | -0.686199 | -1.922769 |
| H | -5.024731 | -1.380374 | -3.049235 |
| H | -2.841011 | -0.398465 | -2.310405 |
| N | -1.295812 | -0.600462 | 1.337317  |
| C | -1.822198 | -0.181018 | 2.637590  |
| H | -1.284874 | 0.721331  | 2.973604  |
| H | -2.909121 | 0.024739  | 2.612141  |
| H | -1.617938 | -0.969957 | 3.383552  |
| S | -1.330936 | -2.294150 | 1.031186  |
| O | -0.965232 | -2.480806 | -0.366240 |
| O | -0.589181 | -2.983187 | 2.080278  |
| C | -3.059206 | -2.648670 | 1.212593  |
| H | -3.624222 | -2.025614 | 0.498506  |
| H | -3.377411 | -2.476628 | 2.252546  |
| H | -3.162716 | -3.717707 | 0.960868  |
| H | -2.573079 | 2.410917  | 1.537127  |
| C | 3.845804  | -1.506499 | -2.533151 |
| C | 4.809691  | 0.221437  | -0.434680 |
| H | 5.343944  | -2.762194 | -0.229456 |
| H | 4.302245  | -2.385538 | 1.193814  |
| H | 3.685076  | -3.457439 | -0.102841 |
| H | 3.217607  | -2.371709 | -2.808930 |
| H | 3.537511  | -0.640335 | -3.144696 |
| H | 4.906318  | -1.743338 | -2.740500 |
| H | 5.832633  | -0.077801 | -0.731057 |
| H | 4.513260  | 1.122444  | -1.001327 |
| H | 4.797201  | 0.468514  | 0.642248  |

## 6c2B

54

scf done: -1965.661316

|    |           |           |           |
|----|-----------|-----------|-----------|
| N  | -1.315040 | 0.552075  | -1.013370 |
| C  | -2.620830 | 0.795224  | -0.569676 |
| N  | -2.322933 | 1.556285  | 0.461496  |
| C  | -0.899777 | 1.310303  | 0.211506  |
| C  | -0.556744 | -0.124761 | 0.182007  |
| Au | 1.442374  | -0.599944 | -0.333869 |
| P  | 3.710527  | -1.034396 | -0.892486 |
| N  | -1.372175 | -1.020537 | 0.941236  |
| C  | -1.474872 | -2.375763 | 0.417262  |

|   |           |           |           |
|---|-----------|-----------|-----------|
| S | -1.345594 | -0.858548 | 2.623715  |
| H | -0.486471 | -2.879674 | 0.365608  |
| H | -2.167010 | -2.959146 | 1.044833  |
| H | -1.892916 | -2.326895 | -0.604013 |
| O | -1.282019 | 0.573708  | 2.907540  |
| O | -2.445573 | -1.659496 | 3.138276  |
| C | 0.179872  | -1.594603 | 3.158019  |
| H | 0.225925  | -1.460232 | 4.251678  |
| H | 0.165113  | -2.667812 | 2.905842  |
| H | 1.020319  | -1.076654 | 2.663488  |
| C | -3.846276 | 0.273007  | -1.087363 |
| C | -3.808844 | -0.483928 | -2.271761 |
| C | -5.063097 | 0.493864  | -0.418205 |
| C | -4.983732 | -1.026255 | -2.773964 |
| H | -2.852465 | -0.629250 | -2.786855 |
| C | -6.231338 | -0.051219 | -0.928977 |
| H | -5.085648 | 1.084362  | 0.504704  |
| C | -6.189487 | -0.809663 | -2.103059 |
| H | -4.965981 | -1.617282 | -3.695126 |
| H | -7.182810 | 0.110371  | -0.412606 |
| C | 0.073233  | 2.425323  | 0.221195  |
| C | 0.088058  | 3.356033  | -0.820120 |
| C | 0.969362  | 2.547693  | 1.287758  |
| C | 1.007825  | 4.402296  | -0.800963 |
| H | -0.617877 | 3.246408  | -1.652936 |
| C | 1.884554  | 3.597153  | 1.305781  |
| H | 0.935625  | 1.815364  | 2.103507  |
| C | 1.906105  | 4.521482  | 0.260170  |
| H | 1.026494  | 5.128535  | -1.621141 |
| H | 2.587378  | 3.695023  | 2.140616  |
| H | 2.630515  | 5.343762  | 0.272279  |
| H | -7.115544 | -1.237484 | -2.502618 |
| C | 4.051184  | -1.002683 | -2.683923 |
| C | 4.861346  | 0.193342  | -0.187861 |
| C | 4.368268  | -2.641635 | -0.336555 |
| H | 4.771649  | 0.198598  | 0.913164  |
| H | 5.904366  | -0.047351 | -0.467334 |
| H | 4.604827  | 1.199949  | -0.563986 |
| H | 3.786347  | -3.462028 | -0.792382 |
| H | 5.430319  | -2.740665 | -0.629786 |
| H | 4.285188  | -2.720496 | 0.761713  |
| H | 3.765858  | -0.019903 | -3.098987 |
| H | 5.125346  | -1.183082 | -2.876648 |
| H | 3.454588  | -1.782484 | -3.189631 |
| H | -2.826183 | 1.876578  | 1.290459  |

# TS<sub>6c1A'</sub>

54

scf done: -1965.653908

|    |           |           |           |
|----|-----------|-----------|-----------|
| N  | -1.434303 | 0.225377  | -0.903922 |
| C  | -2.716195 | 0.755749  | -0.447338 |
| N  | -2.352488 | 1.548722  | 0.493520  |
| C  | -0.939891 | 1.271154  | 0.219513  |
| C  | -0.550591 | -0.144193 | 0.304822  |
| Au | 1.417214  | -0.706461 | -0.302874 |
| P  | 3.677630  | -1.072426 | -0.870284 |
| C  | -1.195692 | -1.025293 | 1.307703  |
| C  | -4.009513 | 0.347025  | -0.936404 |
| C  | -4.124136 | -0.638070 | -1.927968 |
| C  | -5.159128 | 0.946233  | -0.395832 |



|   |           |           |           |
|---|-----------|-----------|-----------|
| C | -5.383942 | -1.027382 | -2.369313 |
| H | -3.226540 | -1.104965 | -2.350712 |
| C | -6.412348 | 0.553868  | -0.843778 |
| H | -5.048812 | 1.715577  | 0.376372  |
| C | -6.524073 | -0.431860 | -1.828797 |
| H | -5.478651 | -1.798755 | -3.140493 |
| H | -7.312578 | 1.015843  | -0.425205 |
| N | -0.105017 | 2.322109  | -0.047844 |
| H | -7.515461 | -0.738286 | -2.180467 |
| H | -1.086084 | 0.148041  | -1.864449 |
| C | 4.162450  | -0.205031 | -2.398651 |
| C | 4.754852  | -0.350724 | 0.411478  |
| C | 4.268850  | -2.781897 | -1.086335 |
| H | 4.602553  | -0.881026 | 1.368315  |
| H | 5.818362  | -0.422704 | 0.116195  |
| H | 4.477694  | 0.710433  | 0.550243  |
| H | 3.719295  | -3.265908 | -1.912674 |
| H | 5.350963  | -2.785908 | -1.315246 |
| H | 4.089829  | -3.357200 | -0.161113 |
| H | 3.909591  | 0.865821  | -2.296628 |
| H | 5.249214  | -0.310263 | -2.576227 |
| H | 3.609606  | -0.618845 | -3.260372 |
| S | 1.379972  | 2.511882  | 0.797988  |
| C | -0.571592 | 3.431210  | -0.873697 |
| H | 0.299799  | 3.945612  | -1.311963 |
| H | -1.166334 | 3.028212  | -1.710985 |
| H | -1.191617 | 4.147434  | -0.303937 |
| C | 1.160308  | 4.077257  | 1.600024  |
| O | 1.426409  | 1.478057  | 1.823216  |
| O | 2.446234  | 2.636028  | -0.186364 |
| H | 2.070206  | 4.214971  | 2.208313  |
| H | 1.081762  | 4.883277  | 0.854733  |
| H | 0.268625  | 4.021475  | 2.244403  |
| C | -1.179402 | -0.660458 | 2.658381  |
| C | -1.738386 | -1.504071 | 3.616517  |
| C | -2.325775 | -2.709978 | 3.234340  |
| C | -2.347241 | -3.073582 | 1.886978  |
| C | -1.778920 | -2.239084 | 0.927831  |
| H | -0.716076 | 0.290284  | 2.951952  |
| H | -1.722195 | -1.211291 | 4.672564  |
| H | -2.770040 | -3.369015 | 3.988749  |
| H | -2.808715 | -4.019099 | 1.580020  |
| H | -1.784573 | -2.528432 | -0.131860 |

# TS<sub>6c1B'</sub>

54

scf done: -1965.647745

|    |           |           |           |
|----|-----------|-----------|-----------|
| Au | -1.783728 | -0.206164 | 0.159415  |
| P  | -3.975329 | 0.007329  | 1.033040  |
| C  | -4.468170 | -1.348733 | 2.147629  |
| C  | 0.204993  | -0.489366 | -0.558591 |
| C  | 0.987577  | 0.591638  | -1.108726 |
| N  | 2.392948  | 0.251644  | -1.219270 |
| C  | 2.477702  | -0.094031 | 0.070596  |
| N  | 1.206148  | -0.076212 | 0.534997  |
| N  | 0.579730  | 1.846166  | -1.418736 |
| C  | 3.653740  | -0.368409 | 0.852183  |
| C  | 4.932446  | -0.294562 | 0.274987  |
| C  | 6.050698  | -0.585992 | 1.043967  |
| C  | 5.897081  | -0.943825 | 2.385593  |

|   |           |           |           |
|---|-----------|-----------|-----------|
| C | 4.627881  | -1.011238 | 2.966022  |
| C | 3.504842  | -0.720894 | 2.204329  |
| H | 2.499772  | -0.758001 | 2.639149  |
| H | 4.519884  | -1.288226 | 4.019670  |
| H | 6.782371  | -1.170189 | 2.990073  |
| H | 7.049505  | -0.534105 | 0.599114  |
| H | 5.052993  | -0.017621 | -0.778359 |
| C | 0.410586  | -1.879036 | -1.061548 |
| H | 3.074107  | 0.708099  | -1.820665 |
| S | 1.442876  | 3.237676  | -0.814684 |
| C | -0.763775 | 2.117691  | -1.931490 |
| C | 0.775628  | 3.380319  | 0.821835  |
| O | 2.848085  | 2.875377  | -0.727065 |
| O | 1.001655  | 4.351698  | -1.630294 |
| H | -1.460013 | 2.452017  | -1.138869 |
| H | -0.686829 | 2.894878  | -2.708129 |
| H | -1.155985 | 1.195615  | -2.387498 |
| H | 1.281766  | 4.245204  | 1.283346  |
| H | -0.309259 | 3.561915  | 0.749781  |
| H | 0.997109  | 2.447631  | 1.367780  |
| C | 0.148599  | -2.168880 | -2.406572 |
| C | 0.290989  | -3.467795 | -2.887942 |
| C | 0.691637  | -4.494722 | -2.031486 |
| C | 0.951680  | -4.210470 | -0.691355 |
| C | 0.814187  | -2.910018 | -0.207552 |
| H | -0.167736 | -1.362196 | -3.082709 |
| H | 0.092286  | -3.679415 | -3.944997 |
| H | 0.803388  | -5.516701 | -2.410836 |
| H | 1.268685  | -5.010387 | -0.012144 |
| H | 1.018673  | -2.686947 | 0.847788  |
| C | -4.236689 | 1.521436  | 2.016061  |
| C | -5.289696 | 0.059921  | -0.229610 |
| H | -5.499746 | -1.190219 | 2.513903  |
| H | -4.416041 | -2.311088 | 1.608430  |
| H | -3.777716 | -1.391678 | 3.008498  |
| H | -5.276610 | 1.562834  | 2.390939  |
| H | -3.539681 | 1.534775  | 2.872560  |
| H | -4.040818 | 2.410214  | 1.390005  |
| H | -6.279860 | 0.164068  | 0.252440  |
| H | -5.122186 | 0.916200  | -0.906573 |
| H | -5.270987 | -0.868415 | -0.827207 |

# TS<sub>6c2A'</sub>

54

scf done: -1965.648502

|    |           |           |           |
|----|-----------|-----------|-----------|
| H  | -1.050671 | 0.341087  | -1.882513 |
| N  | -1.392318 | 0.132882  | -0.941629 |
| C  | -2.696014 | 0.409236  | -0.390674 |
| N  | -2.471494 | 0.913116  | 0.769087  |
| C  | -1.047152 | 0.981557  | 0.551112  |
| C  | -0.440019 | -0.298678 | 0.178769  |
| Au | 1.595039  | -0.431178 | -0.444612 |
| P  | 3.897657  | -0.517665 | -1.001949 |
| N  | -0.974324 | -1.446948 | 0.866039  |
| C  | -3.942217 | 0.069248  | -1.038533 |
| C  | -3.950938 | -0.654890 | -2.239490 |
| C  | -5.150931 | 0.458648  | -0.438938 |
| C  | -5.162847 | -0.995699 | -2.830570 |
| H  | -3.007143 | -0.962955 | -2.704496 |
| C  | -6.356189 | 0.117057  | -1.036086 |

|   |           |           |           |
|---|-----------|-----------|-----------|
| H | -5.124639 | 1.031756  | 0.494550  |
| C | -6.361632 | -0.609100 | -2.230677 |
| H | -5.173592 | -1.565247 | -3.765636 |
| H | -7.301554 | 0.418402  | -0.572830 |
| H | -7.314953 | -0.874654 | -2.700879 |
| C | -0.395385 | 2.287897  | 0.593756  |
| C | -0.812900 | -2.729074 | 0.204724  |
| S | -0.807975 | -1.421308 | 2.544442  |
| H | -1.351418 | -3.514300 | 0.760670  |
| H | -1.263783 | -2.657792 | -0.801729 |
| H | 0.252823  | -3.021401 | 0.104704  |
| C | -2.456640 | -1.724805 | 3.115406  |
| O | 0.045998  | -2.531596 | 2.950738  |
| O | -0.438131 | -0.050455 | 2.900254  |
| H | -2.413876 | -1.733862 | 4.217468  |
| H | -3.093317 | -0.904431 | 2.746127  |
| H | -2.794021 | -2.703584 | 2.737402  |
| C | -1.134156 | 3.438295  | 0.272906  |
| C | -0.532295 | 4.689377  | 0.319840  |
| C | 0.799755  | 4.806998  | 0.721556  |
| C | 1.529514  | 3.673051  | 1.079592  |
| C | 0.938739  | 2.415961  | 1.013092  |
| H | -2.183970 | 3.344622  | -0.025900 |
| H | -1.107257 | 5.581689  | 0.051098  |
| H | 1.269858  | 5.795594  | 0.768539  |
| H | 2.565744  | 3.769499  | 1.421200  |
| H | 1.500541  | 1.527047  | 1.322564  |
| C | 4.277571  | -0.393661 | -2.780578 |
| C | 4.808801  | 0.866341  | -0.239559 |
| C | 4.778510  | -2.012910 | -0.446018 |
| H | 5.372100  | -0.400225 | -2.940126 |
| H | 3.826588  | -1.245570 | -3.319311 |
| H | 3.855472  | 0.542395  | -3.187066 |
| H | 5.882096  | 0.822122  | -0.503688 |
| H | 4.384477  | 1.824551  | -0.590089 |
| H | 4.700651  | 0.818152  | 0.859132  |
| H | 5.851627  | -1.943987 | -0.704838 |
| H | 4.672660  | -2.121087 | 0.647765  |
| H | 4.342798  | -2.904860 | -0.929790 |

# TS<sub>6c2B'</sub>

54

scf done: -1965.643268

|    |           |           |           |
|----|-----------|-----------|-----------|
| Au | 1.515374  | -0.470120 | -0.438972 |
| P  | 3.782725  | -0.607869 | -1.126082 |
| C  | 4.730630  | -2.002796 | -0.432776 |
| C  | -0.494408 | -0.254610 | 0.233774  |
| C  | -1.025748 | 1.052354  | 0.542098  |
| N  | -2.469314 | 1.051478  | 0.638808  |
| C  | -2.667799 | 0.298404  | -0.454874 |
| N  | -1.460034 | -0.031412 | -0.940292 |
| C  | -0.357221 | 2.332759  | 0.491581  |
| C  | -1.071089 | 3.483999  | 0.107865  |
| C  | -0.438947 | 4.719215  | 0.071928  |
| C  | 0.901362  | 4.825527  | 0.448841  |
| C  | 1.610672  | 3.696553  | 0.866239  |
| C  | 0.991000  | 2.454973  | 0.882876  |
| H  | 1.534170  | 1.572182  | 1.239469  |
| H  | 2.653015  | 3.790050  | 1.188875  |
| H  | 1.396848  | 5.802554  | 0.428479  |

|   |           |           |           |
|---|-----------|-----------|-----------|
| H | -0.993214 | 5.607901  | -0.247020 |
| H | -2.123668 | 3.393744  | -0.180599 |
| C | -3.933156 | -0.042107 | -1.059947 |
| C | -5.137104 | 0.480420  | -0.559697 |
| C | -6.342703 | 0.106765  | -1.138468 |
| C | -6.350191 | -0.781080 | -2.216932 |
| C | -5.154858 | -1.296815 | -2.723576 |
| C | -3.945545 | -0.927200 | -2.150595 |
| H | -2.995174 | -1.316929 | -2.532579 |
| H | -5.171109 | -1.988545 | -3.572097 |
| H | -7.303140 | -1.071617 | -2.672952 |
| H | -7.283810 | 0.512122  | -0.752987 |
| H | -5.128651 | 1.190308  | 0.275340  |
| N | -1.028222 | -1.330911 | 1.072791  |
| C | -0.862011 | -2.662168 | 0.511714  |
| H | 0.205179  | -2.947776 | 0.405886  |
| H | -1.382675 | -3.410910 | 1.132481  |
| H | -1.334918 | -2.666643 | -0.486627 |
| S | -0.595284 | -1.166857 | 2.697853  |
| O | 0.613146  | -1.928121 | 3.004508  |
| O | -0.621064 | 0.274794  | 2.969250  |
| C | -1.962367 | -1.916738 | 3.540704  |
| H | -1.754166 | -1.792909 | 4.616570  |
| H | -2.014787 | -2.987783 | 3.290198  |
| H | -2.884394 | -1.387362 | 3.253812  |
| H | -3.014530 | 1.165066  | 1.494541  |
| C | 4.066581  | -0.711063 | -2.924676 |
| C | 4.712674  | 0.874795  | -0.607315 |
| H | 5.786204  | -1.952801 | -0.759524 |
| H | 4.687526  | -1.968285 | 0.670278  |
| H | 4.289283  | -2.957336 | -0.769597 |
| H | 5.769473  | 0.807747  | -0.927882 |
| H | 4.251062  | 1.774639  | -1.052864 |
| H | 4.669907  | 0.970229  | 0.492776  |
| H | 5.150908  | -0.712219 | -3.144034 |
| H | 3.612959  | -1.635908 | -3.322663 |
| H | 3.594488  | 0.153092  | -3.424677 |

# 6c1

54

scf done: -1965.764042

|   |           |           |           |
|---|-----------|-----------|-----------|
| C | 0.397711  | 0.987073  | 0.502809  |
| N | 1.714554  | 0.652272  | 0.944462  |
| C | 2.516276  | 0.503585  | -0.112596 |
| N | 1.871530  | 0.764949  | -1.254320 |
| C | 0.620370  | 1.106004  | -0.917140 |
| C | -0.347266 | 1.971463  | 1.346598  |
| C | -0.273298 | 3.332589  | 1.023642  |
| C | -0.913726 | 4.285691  | 1.813584  |
| C | -1.619036 | 3.890216  | 2.949618  |
| C | -1.676281 | 2.539903  | 3.293052  |
| C | -1.047151 | 1.586864  | 2.494856  |
| N | -0.223055 | 1.557288  | -1.916596 |
| C | 0.325555  | 1.630412  | -3.273463 |
| S | -1.941455 | 1.523898  | -1.844821 |
| O | -2.391570 | 0.807139  | -3.027828 |
| O | -2.339526 | 1.061813  | -0.522077 |
| C | -2.373016 | 3.233197  | -1.992533 |
| C | 3.909431  | 0.070022  | -0.055202 |
| C | 4.548308  | -0.214485 | 1.160658  |

|    |           |           |           |
|----|-----------|-----------|-----------|
| C  | 5.878561  | -0.619079 | 1.173684  |
| C  | 6.583937  | -0.743528 | -0.023972 |
| C  | 5.954596  | -0.462630 | -1.237158 |
| C  | 4.624204  | -0.059374 | -1.254977 |
| H  | 0.302107  | 3.651848  | 0.144139  |
| H  | -0.851066 | 5.346526  | 1.545348  |
| H  | -2.121778 | 4.638157  | 3.572962  |
| H  | -2.224422 | 2.222765  | 4.187257  |
| H  | -1.108077 | 0.523254  | 2.762109  |
| H  | -0.371430 | 2.179730  | -3.923900 |
| H  | 1.283618  | 2.170035  | -3.240623 |
| H  | 0.490628  | 0.624239  | -3.697570 |
| H  | -3.475527 | 3.261150  | -2.010763 |
| H  | -1.983256 | 3.763882  | -1.108381 |
| H  | -1.966241 | 3.642241  | -2.930745 |
| H  | 4.015104  | -0.123000 | 2.114234  |
| H  | 6.506468  | -0.560862 | -2.178313 |
| H  | 4.116165  | 0.161292  | -2.199346 |
| H  | 6.369498  | -0.839094 | 2.127696  |
| Au | -0.637130 | -1.037036 | 0.369834  |
| P  | -1.773469 | -3.072531 | 0.194352  |
| H  | 1.950421  | 0.503537  | 1.923246  |
| H  | 7.632013  | -1.062673 | -0.010705 |
| C  | -2.062612 | -3.956370 | 1.758405  |
| C  | -3.427121 | -2.795355 | -0.516313 |
| C  | -0.979269 | -4.291418 | -0.898819 |
| H  | -2.613909 | -3.305107 | 2.458855  |
| H  | -2.651884 | -4.873421 | 1.570074  |
| H  | -1.096230 | -4.231038 | 2.216318  |
| H  | -3.326974 | -2.293524 | -1.495628 |
| H  | -3.962003 | -3.755036 | -0.643791 |
| H  | -4.008376 | -2.136355 | 0.153086  |
| H  | 0.011350  | -4.565180 | -0.495478 |
| H  | -1.608093 | -5.198425 | -0.975180 |
| H  | -0.842990 | -3.855332 | -1.903896 |

## 6c2

54

scf done: -1965.765556

|    |           |           |           |
|----|-----------|-----------|-----------|
| C  | 0.430011  | 0.911973  | 0.950600  |
| N  | 1.689775  | 0.357005  | 1.208800  |
| C  | 2.452420  | 0.511240  | 0.102595  |
| N  | 1.808403  | 1.185003  | -0.837439 |
| C  | 0.569037  | 1.476912  | -0.349862 |
| N  | -0.404418 | 1.336446  | 1.994623  |
| C  | -0.335831 | 2.384975  | -1.076055 |
| C  | 3.802952  | -0.028325 | -0.046193 |
| C  | 4.490463  | -0.607076 | 1.029885  |
| C  | 5.777530  | -1.104207 | 0.852293  |
| C  | 6.391042  | -1.026743 | -0.398158 |
| C  | 5.714072  | -0.447704 | -1.472409 |
| C  | 4.427091  | 0.048965  | -1.299367 |
| H  | 4.034619  | -0.663593 | 2.025266  |
| H  | 6.194404  | -0.384865 | -2.454966 |
| H  | 3.883124  | 0.503095  | -2.134071 |
| H  | 6.307560  | -1.552288 | 1.699615  |
| Au | -0.716000 | -0.696809 | -0.403290 |
| P  | -1.934564 | -2.511573 | -1.212553 |
| H  | 1.890678  | -0.211945 | 2.029569  |
| H  | 7.404906  | -1.418889 | -0.535463 |

|   |           |           |           |
|---|-----------|-----------|-----------|
| C | -2.581992 | -3.521689 | 0.154122  |
| C | -3.382513 | -2.038707 | -2.203972 |
| C | -0.964785 | -3.641224 | -2.253722 |
| H | -3.243566 | -2.905118 | 0.788813  |
| H | -3.153123 | -4.381503 | -0.243188 |
| H | -1.745208 | -3.890726 | 0.772964  |
| H | -3.056461 | -1.473311 | -3.094286 |
| H | -3.932649 | -2.943352 | -2.523866 |
| H | -4.050341 | -1.397779 | -1.602052 |
| H | -0.099040 | -4.021591 | -1.684236 |
| H | -1.595309 | -4.490856 | -2.575983 |
| H | -0.594968 | -3.101485 | -3.142754 |
| C | -0.150735 | 2.661662  | 2.568380  |
| S | -1.120293 | 0.177241  | 3.012455  |
| H | -1.013381 | 2.981586  | 3.175217  |
| H | 0.756739  | 2.670019  | 3.200534  |
| H | -0.029350 | 3.380712  | 1.740427  |
| O | -0.996035 | 0.661644  | 4.378561  |
| C | -2.835837 | 0.212143  | 2.564692  |
| O | -0.559395 | -1.120218 | 2.635572  |
| H | -3.344548 | -0.516299 | 3.218758  |
| H | -3.222948 | 1.228122  | 2.747887  |
| H | -2.941148 | -0.075830 | 1.504700  |
| C | 0.108330  | 2.951138  | -2.279361 |
| C | -0.706844 | 3.825229  | -2.992190 |
| C | -1.976166 | 4.148722  | -2.514166 |
| C | -2.427169 | 3.591319  | -1.317152 |
| C | -1.616645 | 2.715998  | -0.601751 |
| H | 1.108604  | 2.697758  | -2.644205 |
| H | -0.344996 | 4.261141  | -3.930068 |
| H | -2.616717 | 4.838589  | -3.074855 |
| H | -3.422937 | 3.841142  | -0.934610 |
| H | -1.986297 | 2.284708  | 0.335555  |

## Tables of partial charges of crucial structures of B/C-Series

| <div style="display: flex; flex-wrap: wrap; justify-content: space-around;"> <div style="text-align: center;"> 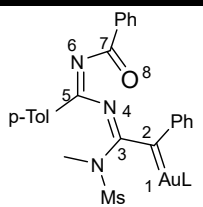 <p><b>4b1</b></p> </div> <div style="text-align: center;">  <p><b>TS5b1</b></p> </div> <div style="text-align: center;">  <p><b>5b1</b></p> </div> <div style="text-align: center;">  <p><b>TS6b1A</b></p> </div> <div style="text-align: center;">  <p><b>TS6b1B</b></p> </div> </div> |                  |           |           |           |           |           |           |           |           |           |
|------------------------------------------------------------------------------------------------------------------------------------------------------------------------------------------------------------------------------------------------------------------------------------------------------------------------------------------------------------------------------------------------------------------------------------------------------------------------------------------------------------------------------------------------------------------------------------------------------------------------------------------------------------------------------------------------------------------------------------------------------------------------------------------------------------------------------------|------------------|-----------|-----------|-----------|-----------|-----------|-----------|-----------|-----------|-----------|
| <div style="display: flex; flex-wrap: wrap; justify-content: space-around;"> <div style="text-align: center;">  <p><b>4b2</b></p> </div> <div style="text-align: center;">  <p><b>TS5b2</b></p> </div> <div style="text-align: center;">  <p><b>5b2</b></p> </div> <div style="text-align: center;">  <p><b>TS6b2A</b></p> </div> <div style="text-align: center;">  <p><b>TS6b2B</b></p> </div> </div> |                  |           |           |           |           |           |           |           |           |           |
|                                                                                                                                                                                                                                                                                                                                                                                                                                                                                                                                                                                                                                                                                                                                                                                                                                    | 4b1              | 4b2       | TS_5b1    | TS_5b2    | 5b1       | 5b2       | TS_6b1A   | TS_6b2A   | TS_6b1B   | TS_6b2B   |
| 1-Au                                                                                                                                                                                                                                                                                                                                                                                                                                                                                                                                                                                                                                                                                                                                                                                                                               | 0.120944         | 0.194652  | 0.145753  | 0.211691  | 0.114595  | 0.235655  | 0.206867  | 0.238972  | 0.144805  | 0.179897  |
| 2-C                                                                                                                                                                                                                                                                                                                                                                                                                                                                                                                                                                                                                                                                                                                                                                                                                                | <b>0.894065</b>  | 0.236744  | 0.907579  | 0.19533   | 0.955435  | 0.325304  | 0.762552  | 0.673092  | 0.806853  | 0.77089   |
| 3-C                                                                                                                                                                                                                                                                                                                                                                                                                                                                                                                                                                                                                                                                                                                                                                                                                                | <b>1.185185</b>  | 1.003198  | 1.414182  | 1.60575   | 0.853187  | 0.661227  | 1.155488  | 1.377783  | 0.763504  | 0.600618  |
| 4-N                                                                                                                                                                                                                                                                                                                                                                                                                                                                                                                                                                                                                                                                                                                                                                                                                                | -1.332222        | -1.208757 | -1.133197 | -1.230472 | -1.020151 | -0.982092 | -1.042689 | -1.09442  | -1.413728 | -1.519344 |
| 5-C                                                                                                                                                                                                                                                                                                                                                                                                                                                                                                                                                                                                                                                                                                                                                                                                                                | 1.537495         | 1.538158  | 1.152096  | 1.324972  | 1.224882  | 1.278928  | 1.221485  | 1.266385  | 1.775056  | 1.848884  |
| 6-N                                                                                                                                                                                                                                                                                                                                                                                                                                                                                                                                                                                                                                                                                                                                                                                                                                | <b>-1.355262</b> | -1.43594  | -1.42201  | -1.492785 | -1.140083 | -1.106504 | -1.517246 | -1.480617 | -1.239887 | -1.331464 |
| 7-C                                                                                                                                                                                                                                                                                                                                                                                                                                                                                                                                                                                                                                                                                                                                                                                                                                | 1.62677          | 1.686675  | 1.449818  | 1.324283  | 1.552585  | 1.396078  | 1.508171  | 1.54265   | 1.531206  | 1.710358  |
| 8-O                                                                                                                                                                                                                                                                                                                                                                                                                                                                                                                                                                                                                                                                                                                                                                                                                                | -0.955994        | -0.975795 | -0.945551 | -0.829415 | -0.967732 | -0.874619 | -0.880036 | -0.936137 | -0.881069 | -0.920224 |

**Table S1.** Values of partial charges for Series-B

|         |                  |            |               |               |                 |                 |                |                |                |                |
|---------|------------------|------------|---------------|---------------|-----------------|-----------------|----------------|----------------|----------------|----------------|
|         |                  |            |               |               |                 |                 |                |                |                |                |
|         |                  |            |               |               |                 |                 |                |                |                |                |
|         | <b>4c1</b>       | <b>4c2</b> | <b>TS_5c1</b> | <b>TS_5c2</b> | <b>5c1</b>      | <b>5c2</b>      | <b>TS_6c1A</b> | <b>TS_6c2A</b> | <b>TS_6c1B</b> | <b>TS_6c2B</b> |
| 1-Au    | 0.098709         | 0.19294    | 0.162348      | 0.211666      | 0.088815        | 0.193403        | 0.13896        | 0.171871       | 0.127574       | 0.18835        |
| 2-C     | <b>0.916796</b>  | 0.089538   | 0.939511      | 0.061567      | <b>1.070416</b> | <b>0.337279</b> | 0.876762       | 0.776936       | 0.932643       | 0.879914       |
| 3-C     | <b>1.263572</b>  | 1.137719   | 1.407143      | 1.468532      | 0.815943        | 0.534177        | 0.900219       | 0.834716       | 0.848677       | 0.638202       |
| 4-N     | -1.263664        | -1.243767  | -1.445964     | -1.209881     | -1.040223       | -0.948257       | -0.980906      | -0.904711      | -0.925783      | -1.536372      |
| 5-C     | 1.209813         | 1.321927   | 1.419242      | 1.185547      | 1.176866        | 1.206591        | 1.168054       | 1.154241       | 1.398518       | 1.554621       |
| 6-N(NH) | <b>-0.924369</b> | -0.992448  | -1.18242      | -1.183294     | -0.906437       | -0.913927       | -1.131005      | -1.133475      | -1.360403      | -0.910495      |

**Table S2.** Values of partial charges for Series-C



| Alternative pathways of cyclization for 4b1 |                  |                                                                                                      | Alternative pathways of cyclization for 4c1 |                  |                                                                                                        |
|---------------------------------------------|------------------|------------------------------------------------------------------------------------------------------|---------------------------------------------|------------------|--------------------------------------------------------------------------------------------------------|
| 1-Au                                        | 0.120944         | 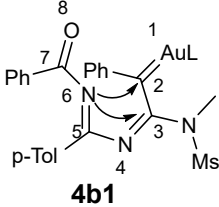 <p><b>4b1</b></p> | 1-Au                                        | 0.098709         |  <p><b>4c1'</b></p> |
| 2-C                                         | <b>0.894065</b>  |                                                                                                      | 2-C                                         | <b>0.916796</b>  |                                                                                                        |
| 3-C                                         | <b>1.185185</b>  |                                                                                                      | 3-C                                         | <b>1.263572</b>  |                                                                                                        |
| 4-N                                         | -1.332222        |                                                                                                      | 4-N                                         | -1.263664        |                                                                                                        |
| 5-C                                         | 1.537495         |                                                                                                      | 5-C                                         | 1.209813         |                                                                                                        |
| 6-N                                         | <b>-1.355262</b> |                                                                                                      | 6-N(NH)                                     | <b>-0.924369</b> |                                                                                                        |
| 7-C                                         | 1.62677          |                                                                                                      |                                             |                  |                                                                                                        |
| 8-O                                         | -0.955994        |                                                                                                      |                                             |                  |                                                                                                        |

**Table S3.** Values of partial charges on the structures of alternative cyclization for Series-B/C

# Energy diagrams of B/C-Series including alternative attack of N-4 of oxadiazole

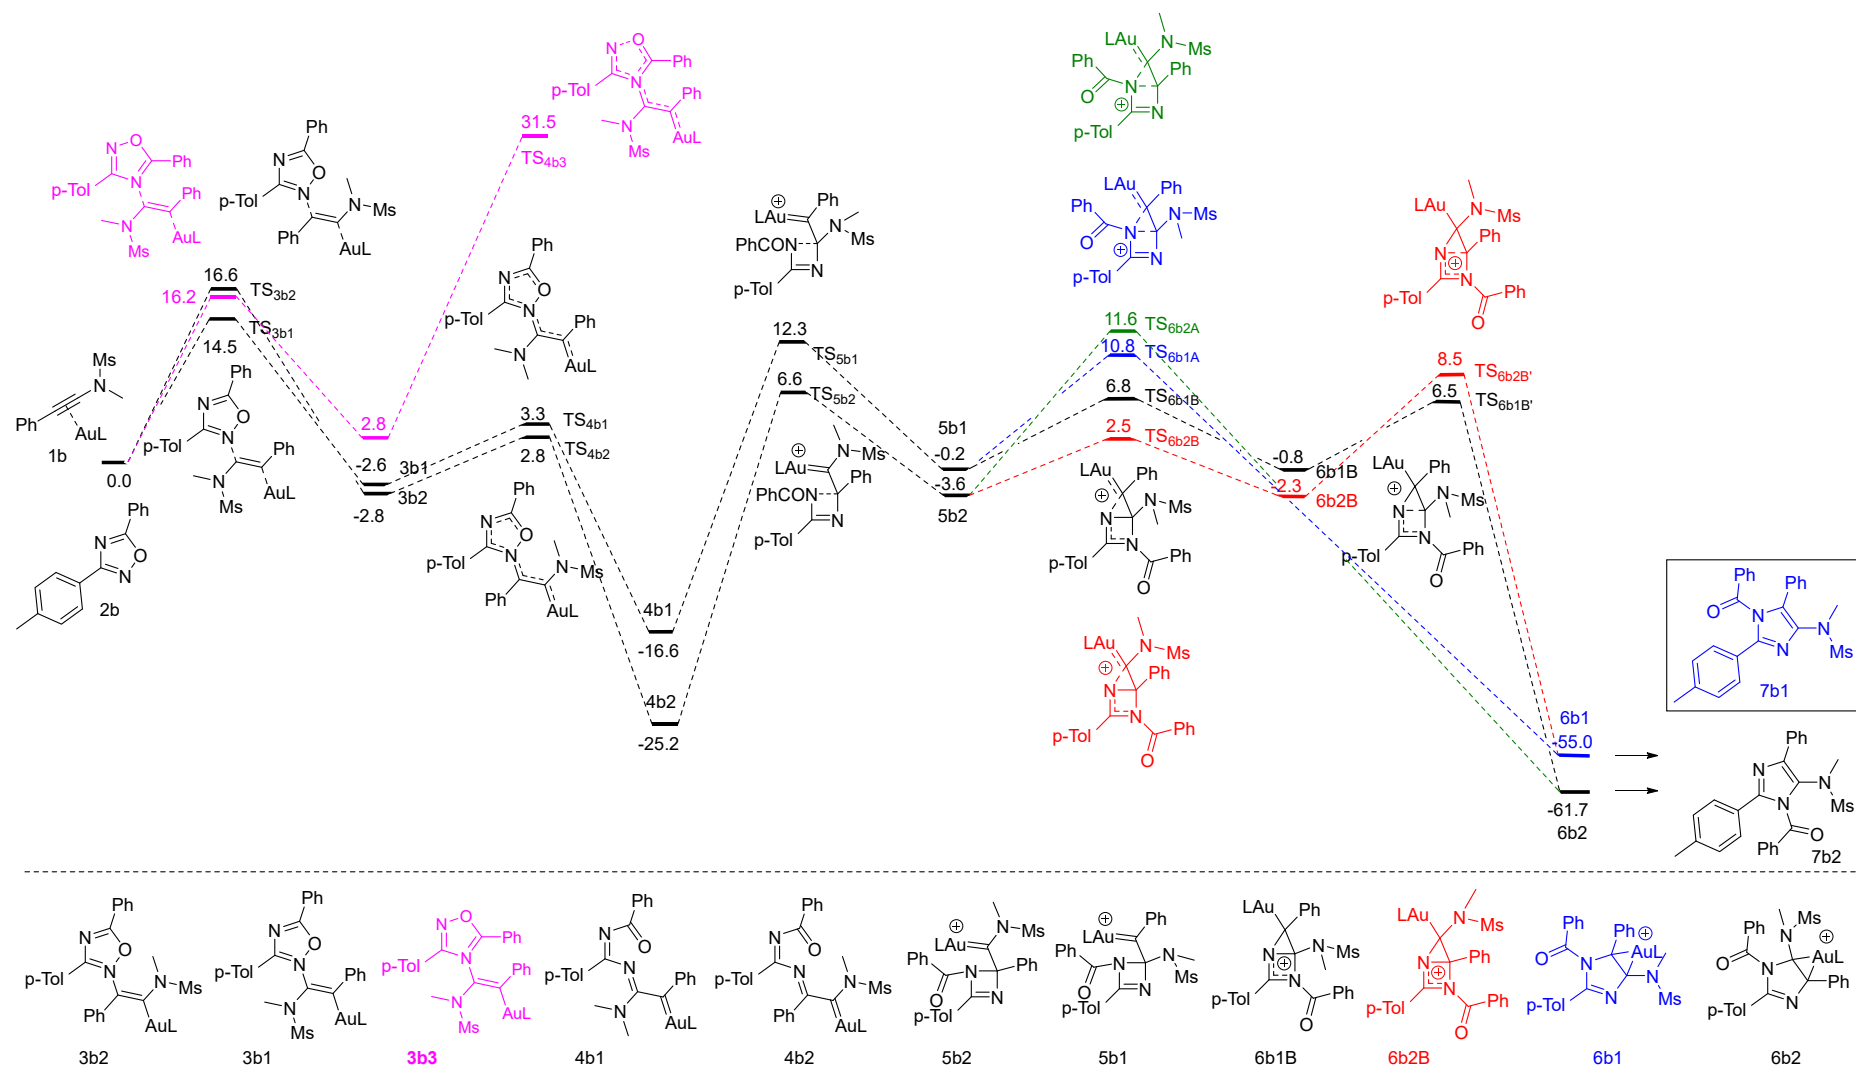

**Figure S4.** B-series reaction mechanism including the alternative path of nucleophilic attack of N-4 of 1,2,4-oxadiazole on ynamide

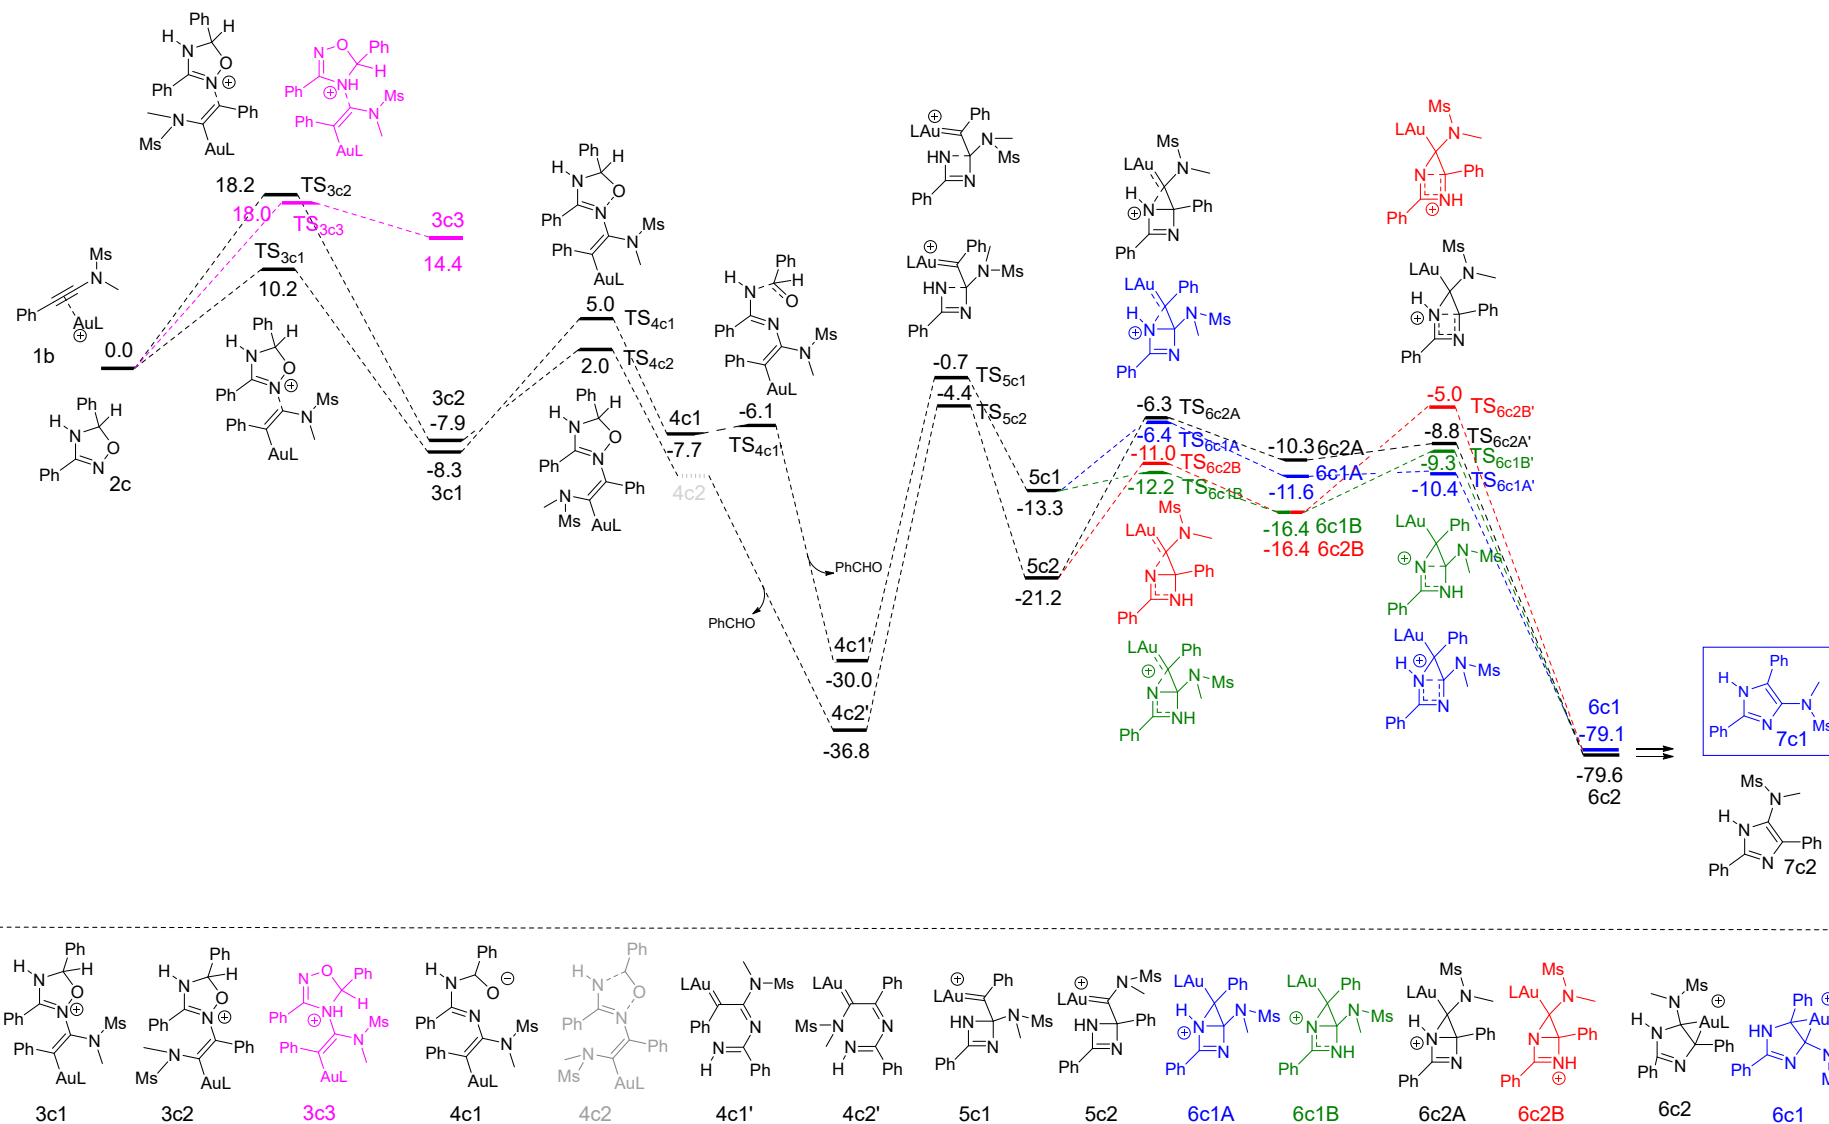

**Figure S5.** C-series reaction mechanism including the alternative path of nucleophilic attack of N-4 of 1,2,4-oxadiazole on ynamid
